# Supplementary material for: Synthesis and Profiling of a Novel Potent Selective Inhibitor of CHK1 Kinase Possessing Unusual N-trifluoromethylpyrazole Pharmacophore Resistant to Metabolic N-dealkylation
Source: Oxford University Press journal article supplement (doi:10.1158/1535-7163.mct-17-0018), 2017-06-15
Supplement: 15357163mct170018-sup-176943_2_supp_4065878_8r384k.docx [file 15357163mct170018-sup-176943_2_supp_4065878_8r384k.docx]

**Synthesis**

**General**

All chemicals were purchased from commercial suppliers and were used without further purification. The solvents were purchased as extra dry and stored over 4Å molecular sieves under nitrogen. Unless noted otherwise, the reactions were carried out in oven-dried glassware under nitrogen atmosphere.

Column chromatography was carried on silica gel (230-400 mesh). TLC plates (silica gel 60 F254 or silica gel-RP18 60 F254) were visualized under UV and/or with phosphomolybdic acid, KMnO4, CAM or H2SO4 in MeOH. HPLC separations were performed on Ultimate 3000 LC Systems (Thermo Scientific) with UV detection using semipreparative columns with chiral stationary phase Chiralpak® ADTM.

HRMS spectra were measured on Agilent 6224 Accurate-Mass TOF LC-MS with dual electrospray/chemical ionization mode with mass accuracy greater than 2 ppm. NMR spectra were recorded on Bruker Avance 300 MHz and 500 MHz spectrometers. Chemical shifts (δ in ppm) of 1H NMR and 13C NMR were referenced to the residual signals of solvents: CDCl3 [7.26 (1H) and 77.16 (13C)] and DMSO-d6 [2.50 (1H) and 39.52 (13C)], chemical shifts of 19F to the signal of α,α,α-trifluorotoluene [-63.72]. Data are represented as follows: chemical shift, multiplicity (s = singlet, d = doublet, t = triplet, q = quartet, m = multiplet and/or multiple resonances), coupling constant (*J*) in Hertz, integration. IR spectra (4000-400 cm–1) were collected on ALPHA ATR spectrometer (BRUKER); solid samples were measured neat and oily samples as films. CD spectra were recorded at 20 °C in a 1 cm quartz cuvette.

***tert*-butyl 3-(3-methoxy-3-oxopropanoyl)piperidine-1-carboxylate (1):**

SOCl2 (1.90 mL, 26.17 mmol) was added dropwise to a solution of 1-(*tert*-butoxycarbonyl) piperidine-3-carboxylic acid(5.00 g, 21.80 mmol) and anhydrous pyridine (4.52 mL, 55.39 mmol) in dichloromethane (30 mL) and the resulting mixture was stirred at 25 °C for 30 min. Then, DMAP (6.84 g, 56.04 mmol) and Meldrum’s acid (3.52 g, 24.42 mmol) were added and the resulting mixture was stirred at 25 °C for 1 hour. The reaction mixture was poured into diethyl ether (200 mL), the organic part was washed with aqueous 1M HCl (2 × 100 mL), brine (100 mL), dried over MgSO4, filtered, and concentrated under reduced pressure. The residue was dissolved in MeOH (60 mL) and the mixture was refluxed for 14 hours. The reaction mixture was concentrated under reduced pressure and the residue was purified by flash column chromatography (CH2Cl2 : EtOAc / 95 : 5) to afford **1** (2.65 g, 43 %) as a slightly orange oil.

HRMS (APCI): calculated for C14H23NO5 [M-H]-:284.1503, found 284.1500

IR (ν˜max, neat) = 2933, 2933, 2860, 1746, 1685, 1628, 1466, 1419, 1365, 1238, 1170, 1140, 1011, 954, 857, 768 cm-1

***tert*-butyl-3-(7-hydroxypyrazolo[1,5-a]pyrimidin-5-yl)piperidine-1-carboxylate (2):**

3-aminopyrazole (0.714 g, 8.58 mmol) was added to a solution of **1** (2.65 g, 9.27 mmol) in anhydrous toluene (15 mL) and the reaction mixture was stirred and refluxed for 24 hours. The mixture was concentrated under reduced pressure and the residue was purified by flash column chromatography (CH2Cl2 : MeOH / 97 : 3) to afford **2** (2.40 g, 81 %) as a white solid.

1H NMR (500 MHz, CDCl3): *δ* = 1.44 (s, 9H), 1.49 – 1.59 (m, 1H), 1.61 – 1.76 (m, 1H), 1.76 – 1.97 (m, 1H), 2.10 – 2.23 (m, 1H), 2.82 – 3.20 (m, 2H), 3.22 – 3.46 (m, 1H), 3.56 – 3.96 (m, 1H), 3.97 – 4.16 (m, 1H), 5.75 (s, 1H), 6.16 (d, *J* = 2.1 Hz, 1H), 7.85 (d, *J* = 2.1 Hz, 1H), 11.78 (s, 1H) ppm

13C NMR (126 MHz, CDCl3): *δ* = 24.2, 28.5, 30.2, 39.8, 44.5, 47.1, 80.7, 90.0, 94.1, 141.9, 143.3, 155.3, 158.1 ppm

HRMS (APCI): calculated for C16H22N4O3 [M+H]+:319.1765 and [2M+H]+: 637.3457, found 319.1767 and 637.3459

IR (ν˜max, neat) = 3152, 3084, 2974, 2919, 2856, 1671, 1619, 1574, 1459, 1411, 1364, 1298, 1266, 1174, 1143, 921, 812, 766, 658, 633, 523 cm-1

m.p. = 209 – 211 °C

***tert*-butyl-3-(7-chloropyrazolo[1,5-a]pyrimidin-5-yl)piperidine-1-carboxylate (3):**

N, N-dimethyl aniline (2.96 mL, 23.36 mmol) was added dropwise to a solution of **2** (2.40 g, 7.53 mmol) in POCl3 (24 mL, 258.19 mmol) and the reaction mixture was stirred at 25 °C for 72 hours. Then, excessive POCl3 was evaporated under reduced pressure and the residue was slowly poured into saturated aqueous NaHCO3 (100 mL). The mixture was extracted with CH2Cl2 (2 × 300 mL). The combined organic extracts were dried over MgSO4, filtered, and concentrated under reduced pressure. The residue was purified by flash column chromatography (CH2Cl2 : EtOAc / 80 : 20) to afford **3** (2.50 g, 98 %) as a pale yellow wax.

1H NMR (500 MHz, CDCl3): *δ* = 1.47 (s, 9H), 1.52 – 1.60 (m, 1H) 1.76 – 1.95 (m, 2H), 2.08 – 2.13 (m, 1H), 2.77 – 2.91 (m, 2H), 3.08 (s, 2H), 3.95 – 4.15 (m, 1H), 4.16 – 4.50 (m, 1H), 6.71 (d, *J* = 2.3 Hz, 1H), 6.91 (s, 1H), 8.18 (d, *J* = 2.3 Hz, 1H) ppm

13C NMR (126 MHz, CDCl3): *δ* = 25.0, 28.6, 30.3, 44.1, 48.2, 79.9, 98.0, 107.8, 138.8, 145.7, 149.8, 154.9, 162.5 ppm

HRMS (APCI): calculated for C16H21ClN4O2 [M+H]+ :337.1426, found 337.1419

IR (ν˜max, neat) = 2974, 2932, 2858, 1685, 1606, 1493, 1477, 1452, 1419, 1365, 1260, 1238, 1172, 1146, 933, 893, 857, 769, 735 cm-1

***tert-*butyl 3-(7-aminopyrazolo[1,5-a]pyrimidin-5-yl)piperidine-1-carboxylate (4):**

A mixture of **3** (2.5 g, 7.42 mmol), 2.0 M NH3 in 2-propanol (11.0 mL) and aqueous 25-29 % NH4OH solution (1.50 mL) was stirred in a pressure tube at 80 °C for 15 hours. The solvents were evaporated under reduced pressure and the residue was purified by flash column chromatography (CH2Cl2 : MeOH / 96 : 4) to afford **4** (2.25 g, 96 %) as a white solid.

1H NMR (500 MHz, DMSO-*d6*): *δ* = 1.39 (s, 9H), 1.41 – 1.50 (m, 1H), 1.65 – 1.77 (m, 2H), 1.90 – 2.03 (m, 1H), 2.48 – 2.52 (m, 1H), 2.61 – 2.71 (m, 1H), 2.72 – 2.83 (m, 1H), 3.88 – 4.00 (m, 1H), 4.08 (brs, 1H), 6.05 (s, 1H), 6.33 (d, *J* = 2.3 Hz, 1H), 8.01 (brs, 2H), 8.07 (d, *J* = 2.3 Hz, 1H) ppm

13C NMR (126 MHz, DMSO-*d*6): *δ* = 24.6, 28.0, 29.6, 42.9, 47.8, 78.7, 86.0, 93.0, 144.1, 147.3, 148.5, 153.8, 161.4 ppm

HRMS (APCI): calculated for C16H23N5O2 [M+H]+ :318.1925, found 318.1925

IR (ν˜max, neat) = 3361, 3308, 3218, 3181, 2974, 2931, 1647, 1596, 1561, 1468, 1426, 1365, 1266, 1240, 1144, 1065, 963, 853, 769, 628 cm-1

m.p. = 182 °C (dec.)

***tert-*butyl-3-(7-(bis(ethoxymethyl)amino)pyrazolo[1,5-a]pyrimidin-5-yl)piperidine-1-carboxylate (5):**

## Ethoxymethyl chloride (1.68 mL, 18.11 mmol) was added to a solution of 4 (2.30 g, 7.25 mmol) and DIPEA (3.78 mL, 21.73 mmol) in 1,2-dichloroethane (80 mL) and the mixture was stirred at 80 °C for 15 hours. The reaction mixture was cooled to 25 °C, quenched with water (100 mL), and extracted with CH2Cl2 (3 × 200 mL). The organic extracts were dried over MgSO4, filtered, and concentrated under reduced pressure. The residue was purified by flash column chromatography (hexane : EtOAc / 60 : 40) to afford 5 (3.00 g, 95%) as a pale yellow wax.

1H NMR (500 MHz, CDCl3): *δ* = 1.20 (t, *J* = 7.0 Hz, 6H), 1.47 (s, 9H), 1.54 – 1.64 (m, 1H), 1.72 – 1.90 (m, 2H), 2.05 – 2.13 (m, 1H), 2.70 – 2.88 (m, 1H), 2.94 – 3.16 (m, 1H), 3.60 (q, *J* = 7.1 Hz, 4H), 4.00 – 4.20 (m, 1H), 4.25 – 4.40 (m, 1H), 5.26 (m, 1H), 6.41 (s, 1H), 6.53 (d, *J* = 2.4 Hz, 1H), 8.02 (d, *J* = 2.3 Hz, 1H) ppm

13C NMR (126 MHz, CDCl3): *δ* = 15.0, 25.0, 28.4, 30.3, 44.3, 48.3, 63.9, 79.4, 79.8, 94.1, 95.1, 143.7, 148.2, 150.8, 154.7, 163.2 ppm

HRMS (APCI): calculated for C22H35N5O4 [M+H]+ :434.2762, found 434.2762

IR (ν˜max, neat) = 2974, 2931, 2897, 2867, 1687, 1604, 1542, 1460, 1415, 1390, 1363, 1300, 1289, 1265, 1254, 1238, 1171, 1147, 1065, 1005, 966, 905, 854, 823, 766, 740 cm-1

***tert-*butyl-3-(7-(bis(ethoxymethyl)amino)-3-iodopyrazolo[1,5-a]pyrimidin-5-yl) piperidine-1-carboxylate (6):**

A solution of N-iodosuccinimide (1.55 g, 6.92 mmol) acetonitrile (15 mL) was added dropwise to a solution of **5** (3.00 g, 6.92 mmol) in acetonitrile (40 mL). The reaction mixture was stirred at 25 °C for 16 hours, and then concentrated under reduced pressure. The residue was purified by flash column chromatography (hexane : EtOAc / 70 : 30) to afford **6** (3.60 g, 93 %) as a colorless wax.

1H NMR (500 MHz, CDCl3): *δ* = 1.18 (t, *J* = 7.1 Hz, 6H), 1.47 (s, 9H), 1.54 – 1.64 (m, 1H), 1.72 – 1.94 (m, 2H), 2.05 – 2.14 (m, 1H), 2.70 – 2.91 (m, 2H), 3.00 – 3.14 (m, 1H), 3.57 (q, *J* = 7.0 Hz, 4H), 4.00 – 4.22 (m, 1H), 4.22 – 4.45 (m, 1H), 5.19 – 5.25 (m, 4H), 6.45 (s, 1H), 8.01 (s, 1H) ppm

13C NMR (126 MHz, CDCl3): *δ* = 15.2, 25.2, 28.6, 30.5, 44.5, 48.2, 64.2, 79.6, 80.1, 94.9, 147.9, 148.6, 149.8, 155.0, 164.9 ppm

HRMS (APCI): calculated for C22H34IN5O4 [M+H]+ :560.1728, found 560.1731

IR (ν˜max, neat) = 2925, 2854, 2248, 1732, 1679, 1603, 1541, 1465, 1453, 1421, 1390, 1380, 1365, 1302, 1256, 1171, 1036, 1011, 727, 647 cm-1

**1-(bromodifluoromethyl)-4-iodo-1H-pyrazole (7):**

| 500 mL (with a magnetic stirring bar) and 100 mL round-bottom flasks (both fitted with silicon septa) were evacuated and then filled with argon. Then, a solution of 4-iodopyrazole (15.00 g, 77.3 mmol) in 70 mL of anhydrous DMF (Merck) was added to the 500 mL flask. The solution was cooled to -30 °C (ethanol/dry ice bath) and a solution of NaHMDS in THF (1M, 81.2 mL, 81.2 mmol) was added dropwise over the period of 50 min while the temperature was maintained below -20 °C. During the formation of sodium salt, the solution became green.  This solution was stirred at 0 °C for 15 minutes while 15 mL of anhydrous DMF was added to the 100 mL flask. The solvent was cooled to -30 °C (ethanol/dry ice bath) and CBr2F2 (8.48 mL, 92.8 mmol) was added quickly. This solution was then added to a solution of the sodium pyrazole salt dropwise at -10 °C over the period of 30 minutes.  Then, the cooling bath was removed and the mixture was stirred under argon for 18 hours. Then, the mixture was slowly poured into water (200 mL) and extracted with Et2O (5 **×** 100 mL). The combined organic extracts were washed with water (100 mL) and brine (100 mL), dried over Na2SO4, and filtered. Et2O ether and THF were evaporated at 30 mbar and the residue (ca. 23 g) was distilled under reduced pressure (20 mbar). The following fractions were collected:  1. 75-95 °C  2. 95-105 °C  3 . > 105 °C  Then, the first and second fractions (ca. 13 g) were combined and purified by flash column chromatography (hexane : CH2Cl2 / 10:1 to 5:1) to afford the product as a colorless oil (8.80 g, 35%). |
| --- |

1H NMR (300 MHz, CDCl3): *δ* = 7.78 (s, 1H), 7.90 (s, 1H) ppm

13C NMR (126 MHz, CDCl3): *δ* = 61.3, 109.5 (t, *1J*C-F = 306.3 Hz), 132.1, 148.5 ppm

19F NMR (282 MHz, CDCl3): *δ* = −33.7 (s) ppm

HRMS (APCI): calcd for C4H2BrF2IN2 [M+H]+: 322.8487/324.8468, found 322.8485/324.8465

**4-iodo-1-(trifluoromethyl)-1H-pyrazole (8):**

| A mixture of compound **7** (8.80 g, 27.27 mmol) and AgF (4.50 g, 135.45 mmol) in pentane (100 mL) was stirred in a 150 mL pressure tube at 25 °C for 9 days. Then, AgF (1.73 g, 13.63 mmol) was added and the mixture was stirred for additional 5 days. Then, AgF (0.69 g, 5.45 mmol) was added and the mixture was stirred for additional 1 day. The mixture was quickly filtered and the solvent from the filtrate was evaporated at 25 °C under reduced pressure (570 mbar). The product (5.11 g, 71%) was obtained as a colorless oil. |
| --- |

1H NMR (300 MHz, CDCl3): δ = 7.76 (s, 1H), 7.88 (s, 1H) ppm

13C NMR (126 MHz, CDCl3): δ = 60.89, 117.62 (q, *1J*C-F = 264.0 Hz), 132.58, 148.66 ppm

19F NMR (282 MHz, CDCl3): δ = −61.6 (s) ppm

HRMS (APCI): calcd for C4H2F3IN2 [M+H]+: 262.9288, found 262.9285

**4-(4,4,5,5-tetramethyl-1,3,2-dioxaborolan-2-yl)-1-(trifluoromethyl)-*1H*-pyrazole (9):**

## A mixture of compound 8 (1.50 g, 5.72 mmol), Pd(dppf)Cl2 (0.419 g, 0.572 mmol), bis(pinacolato)diboron (1.53 g, 6.01 mmol), potassium acetate (2.25 g, 22.88 mmol) and DMF (20 mL) was stirred in a pressure tube at 90 °C for 18 hours. The mixture was cooled to 25 °C, mixed with water (100 mL), and extracted with Et2O (2 × 150 mL). The combined organic extracts were washed with brine (2 × 100 mL), dried over MgSO4, filtered and concentrated under reduced pressure to yield the crude product as a brown solid (1.8 g), which was directly used in the next step without further purification.

1H NMR (500 MHz, CDCl3): *δ* = 1.31 (s, 12H); 7.95 (s, 1H); 8.10 (s, 1H) ppm

13C NMR (126 MHz, CDCl3): *δ* = 25.01; 84.24; 110.64 (HMBC); 118.18 (q, *1J*C-F = 263.9 Hz); 135.30; 148.77 ppm

11B NMR (160 MHz, CDCl3): δ = 29.22 ppm

## 19F NMR (282 MHz, CDCl3): δ = -61.25 (s) ppm

***tert*-butyl-3-(7-(bis(ethoxymethyl)amino)-3-(1-(trifluoromethyl)-1H-pyrazol-4-yl)pyrazolo [1,5-a]pyrimidin-5-yl)piperidine-1-carboxylate (10):**

## A solution of 6 (2.40 g, 4.29 mmol) in DME/H2O (50+12 mL) was added to a mixture of 4-(4, 4, 5, 5-tetramethyl-1, 3, 2-dioxaborolan-2-yl)-1-(trifluoromethyl)-1H-pyrazole (1.68 g, 6.43 mmol), K3PO4 (3.64 g, 17.16 mmol) and Pd(dppf)Cl2 (0.140 g, 0.429 mmol). The reaction mixture was stirred at 100 °C for 3 hours, then diluted with water (100 mL), and extracted with EtOAc (2 × 300 mL). The combined organic extracts were washed with brine (50 mL), dried over MgSO4, filtered, and concentrated under reduced pressure. The residue was purified by flash column chromatography (hexane: EtOAc / 60 : 40) to afford 10 (1.50 g, 62 %) as a light brown solid.

1H NMR (300 MHz, CDCl3): *δ* = 1.21 (t, *J* = 7.0 Hz, 6H), 1.48 (s, 9H), 1.55 – 1.70 (m, 1H), 1.75 – 1.95 (m, 2H), 2.07 – 2.21 (m, 1H), 2.72 – 2.94 (m, 2H), 2.96 – 3.19 (m, 1H), 3.61 (q, *J* = 7.0 Hz, 4H), 4.07 – 4.26 (m, 1H), 4.28 – 4.46 (m, 1H), 5.18 – 5.38 (m, 4H), 6.48 (s, 1H), 8.21 (s, 1H), 8.29 (s, 1H), 8.37 (s, 1H) ppm

13C NMR (126 MHz, CDCl3): *δ* = 15.2, 25.2, 28.6, 30.6, 44.3, 48.7, 64.3, 79.8, 80.1, 94.9, 99.8, 116.7, 119.5 (q, 1*J*C-F = 262.0 Hz), 123.7, 140.8, 141.7, 147.2, 148.5, 155.0, 164.0 ppm

19F NMR (282 MHz, CDCl3): *δ* = -61.14 (s) ppm

HRMS (APCI): calculated for C26H36F3N7O4 [M+H]+: 568.2854, found 568.2851

IR (ν˜max, neat) = 3142, 3095, 2972, 2937, 2889, 2859, 1681, 1590, 1542, 1488, 1424, 1410, 1382, 1365, 1308, 1283, 1270, 1221, 1195, 1165, 1142, 1106, 1088, 1074, 1034, 1000, 969, 908, 868, 663, 628, 466 cm-1

m.p. = 122 – 124 °C

**5-(piperidin-3-yl)-3-(1-(trifluoromethyl)-1H-pyrazol-4-yl)pyrazolo[1,5-a]pyrimidin-7-amine (11):**

Aqueous 3 M HCl (30 mL) was added to a solution of **10** (1.68 g, 1.00 mmol) in ethanol (30 mL) and the reaction mixture was stirred at 80 °C for 3 hours. The solvents were evaporated, the residue was dissolved in 7 M NH3 in MeOH (40 mL) and the mixture was stirred at 25 °C for 2 hours. The solvents were evaporated under reduced pressure and the residue was purified by flash column chromatography (CH2Cl2 : 7 M NH3 in MeOH / 90 : 10) to afford **11** (0.850 g, 82 %) as a white solid.

1H NMR (500 MHz, DMSO-*d6*): *δ* = 1.49 – 1.61 (m, 1H), 1.67 – 1.81 (m, 2H), 1.97 – 2.07 (m, 1H), 2.55 – 2.63 (m, 1H), 2.72 – 2.83 (m, 2H), 2.96 – 3.05 (m, 1H), 3.15 – 3.24 (m, 1H), 6.07 (s, 1H), 7.74 (s, 2H), 8.48 (s, 1H), 8.55 (s, 1H), 8.70 (s, 1H) ppm

13C NMR (126 MHz, DMSO-*d6*): *δ* = 26.1, 30.3, 45.1, 46.1, 51.7, 86.4, 97.2, 117.4, 119.2 (q, 1*J*C-F = 261.0 Hz), 123.4, 141.2, 141.9, 145.3, 148.0, 164.9 ppm

19F NMR (282 MHz, DMSO-*d6*): *δ* = -61.71 (s) ppm

HRMS (APCI): calculated for C15H16F3N7 [M+H]+: 352.1492, found 352.1492

IR (ν˜max, neat) = 3336, 3305, 3162, 2957, 2937, 2854, 2827, 1654, 1567, 1483, 1421, 1397, 1316, 1292, 1260, 1209, 1161, 1133, 981, 941, 915, 800, 763, 640, 627, 620, 501 cm-1

m.p. = 221 – 224 °C

**Separation of enantiomers of compound 11:**

Column : semipreparative Chiralpak-AD (particle size 5 m, 22x250 mm)

Injection Volume : 2 mL (a solution of 20 mg of compound **11** in 2 mL of 2-propanol)

Flow Rate : 9 mL/min

Mobile Phase : n-hexane/IPA 90 : 10 + 0.1 % DEA

Retention times : Enantiomer - A (43.76 min) + Enantiomer - B (58.60 min)

Enantiomer – B (slow eluting) is the required R enantiomer.

***tert*-butyl (R)-3-(7-amino-3-(1-(trifluoromethyl)-1H-pyrazol-4-yl)pyrazolo[1,5-a] pyrimidin-5-yl)piperidine-1-carboxylate (12):**

Di-tert-butyl dicarbonate (0.198 g, 0.907 mmol) was added to a mixture of **11** (enantiomer-B) (0.290 g, 0.825 mmol) and triethylamine (0.576 mL, 4.12 mmol) in CH2Cl2 (10 mL) and the mixture was stirred at 25 °C for 4 hours. The resulting solution was quenched with aqueous saturated NaHCO3 (15 mL) and the mixture was extracted with CH2Cl2 (2 × 50 mL). The organic extracts were dried over MgSO4, filtered, and concentrated under reduced pressure. The residue was purified by flash column chromatography (CH2Cl2 : 7 M NH3 in MeOH / 95 : 5) to afford **12** (0.340 g, 91 %) as a pale yellow solid.

1H NMR (300 MHz, CDCl3): *δ* = 1.48 (s, 9H), 1.62 – 1.70 (m, 1H), 1.74 – 1.96 (m, 2H), 2.05 – 2.20 (m, 1H), 2.67 – 2.92 (m, 2H), 2.99 – 3.18 (m, 1H), 3.96 – 4.22 (m, 1H), 4.26 – 4.41 (m, 1H), 5.67 (s, 2H), 6.07 (s, 1H), 8.19 (s, 1H), 8.27 (s, 1H), 8.36 (s, 1H) ppm

13C NMR (126 MHz, CDCl3): *δ* = 25.2, 28.6, 30.4, 44.4, 48.7, 79.8, 87.8, 99.7, 116.8, 119.5 (q, 1*J*C-F = 262.1 Hz), 123.6, 141.3, 141.6, 145.6, 146.7, 155.1, 164.2 ppm

19F NMR (282 MHz, CDCl3): *δ* = -61.13 (s) ppm

HRMS (APCI): calculated for C20H24F3N7O2 [M+H]+: 452.2016 and [M1+H]+: 803.3436, found 452.2015 and 803.3432

IR (ν˜max, neat) = 3453, 3312, 3179, 2977, 2934, 2859, 1668, 1645, 1624, 1591, 1563, 1526, 1477, 1417, 1366, 1319, 1288, 1170, 917, 883, 803, 733, 634 cm-1

m.p. = 124 – 127 °C

***tert*-butyl (R)-3-(7-amino-6-bromo-3-(1-(trifluoromethyl)-1H-pyrazol-4-yl)pyrazolo[1,5-a] pyrimidin-5-yl)piperidine-1-carboxylate (13):**

To a solution of **12** (0.340 g, 0.753 mmol) in CH2Cl2 (9 mL) was added *t*-BuNH2 (6 mL). Then, a solution of Br2 (0.038 mL, 0.738 mmol) in CH2Cl2 (3 mL) was added dropwise and the resulting mixture was stirred at 25 °C for 16 hours. The reaction mixture was concentrated under reduced pressure and the residue was purified by flash column chromatography (CH2Cl2 : 7 M NH3 in MeOH / 97: 3) to afford **13** (0.390 g, 97 %) as a white solid.

1H NMR (300 MHz, CDCl3): *δ* = 1.48 (s, 9H), 1.63 – 1.74 (m, 1H), 1.76 – 1.94 (m, 2H), 2.07 – 2.18 (m, 1H), 2.71 – 2.94 (m, 1H), 3.00 – 3.17 (m, 1H), 3.18 – 3.34 (m, 1H), 4.05 – 4.25 (m, 1H), 4.27 – 4.47 (m, 1H), 6.11 (s, 2H), 8.16 (s, 1H), 8.28 (s, 1H), 8.30 (s, 1H) ppm

13C NMR (126 MHz, CDCl3): *δ* = 25.21, 28.66, 29.8, 42.83, 44.3, 48.1, 79.7, 85.5, 100.4, 116.3, 119.5 (q, 1*J*C-F = 263.0 Hz), 123.7, 141.6, 141.6, 143.5, 144.5, 154.9, 160.6 ppm

19F NMR (282 MHz, CDCl3): *δ* = -61.16 (s) ppm

HRMS (APCI): calculated for C20H23BrF3N7O2 [M+H]+: 530.1121, found: 530.1119

IR (ν˜max, neat) = 3435, 3297, 3235, 3198, 2976, 2928, 2854, 1676, 1642, 1618, 1588, 1540, 1468, 1417, 1397, 1365, 1317, 1288, 1245, 1174, 1150, 1065, 941, 802, 626 cm-1

m.p. = 110 – 113 °C

**(R)-6-bromo-5-(piperidin-3-yl)-3-(1-(trifluoromethyl)-1H-pyrazol-4-yl)pyrazolo[1,5-a]pyrimidin-7-amine (MU380):**

Trifluoroacetic acid (2.25 mL, 29.42 mmol) was slowly added to a solution of **10** (0.390 g, 0.735 mmol) in CH2Cl2 (10 mL). The reaction mixture was stirred at 25 °C for 2 hours, then the solvents were evaporated. The residue was dissolved in 7 M NH3 in MeOH (5 mL) and the solution stirred at 25 °C for 2 hours. The reaction mixture was concentrated under reduced pressure and the residue was purified by flash column chromatography (CH2Cl2 : 7 M NH3 in MeOH / 95 : 5) to afford **MU380** (0.280 g, 88 %) as a white solid.

1H NMR (500 MHz, DMSO-*d6*): *δ* = 1.46 – 1.57 (m, 1H), 1.68 – 1.82 (m, 2H), 1.94 – 2.04 (m, 1H), 2.52 – 2.58 (m, 1H), 2.72 – 2.80 (m, 1H), 2.93 – 2.99 (m, 1H), 3.09 – 3.14 (m, 1H), 3.15 – 3.23 (m, 2H), 8.51 (s, 1H), 8.54 (s, 1H), 8.72 (s, 1H) ppm

13C NMR (126 MHz, DMSO-*d6*): *δ* = 26.0, 29.5, 43.4, 45.9, 50.4, 83.9, 98.2, 116.8, 119.1 (q, 1*J*C-F = 261.1 Hz), 123.8, 141.7, 141.9, 143.2, 145.5, 161.2 ppm

19F NMR (282 MHz, DMSO-*d6*): *δ* = -61.76 (s) ppm

HRMS (APCI): calculated for C15H15BrF3N7 [M+H]+: 430.0597, found 430.0595

IR (ν˜max, neat) = 3292, 3201, 3153, 2935, 2855, 1642, 1628, 1591, 1541, 1419, 1397, 1316, 1289, 1263, 1207, 1169, 1133, 1104, 940, 921, 868, 802, 747, 664, 622, 560 cm-1

m.p. = 147 – 148 °C

***tert*-butyl-3-(7-(bis(ethoxymethyl)amino)-3-(1-(tert-butoxycarbonyl)-1H-pyrazol**

**-4-yl) pyrazolo[1,5-a]pyrimidin-5-yl)piperidine-1-carboxylate(14):**

## A solution of 6 (1.15 g, 1.92 mmol) in DME/H2O (35+8 mL) was added to a mixture of 1-Boc-pyrazole-4-boronic acid pinacol ester (0.735 g, 2.49 mmol), K3PO4 (1.63 g, 7.68 mmol) and Pd(dppf)Cl2 (0.140 g, 0.192 mmol). The reaction mixture was stirred at 100 °C for 3 hours, then it was diluted with water (50 mL) and extracted with EtOAc (2 × 200 mL). The combined organic extracts were washed with brine (50 mL), dried over MgSO4, filtered, and concentrated under reduced pressure. The residue was purified by flash column chromatography (CH2Cl2 : EtOAc / 50 : 50) to afford 14 (0.640 g, 56 %) as a yellow wax; along with mono-deprotected compound 14a (yellow wax, 0.500 g, 43 %, eluted with CH2Cl2 : EtOAc / 20 : 80).

## Intermediate: 14

1H NMR (300 MHz, CDCl3): *δ* = 1.20 (t, *J* = 7.7, 6.4 Hz, 6H), 1.48 (s, 9H), 1.65 – 1.67 (m, 1H), 1.69 (s, 9H), 1.75 – 1.92 (m, 2H), 2.07 – 2.18 (m, 1H), 2.70 – 2.92 (m, 2H), 2.98 – 3.16 (m, 1H), 3.60 (q, *J* = 7.0 Hz, 4H), 4.06 – 4.24 (m, 1H), 4.30 – 4.44 (m, 1H), 5.24 – 5.29 (m, 4H), 6.46 (s, 1H), 8.20 (s, 1H), 8.28 (s, 1H), 8.62 (s, 1H) ppm

HRMS (APCI): calculated for C30H45N7O6[M+H]+ :600.3504, found 600.3496

IR (ν˜max, neat) = 2974, 2926, 2854, 1764, 1744, 1685, 1639, 1594, 1545, 1476, 1464, 1414, 1367, 1323, 1294, 1267, 1253, 1216, 1168, 1148, 1092, 1079, 915, 841, 766, 729, 655 cm-1

***tert*-butyl 3-(7-(bis(ethoxymethyl)amino)-3-(1H-pyrazol-4-yl)pyrazolo[1,5-a]pyrimidin-5-yl)piperidine-1-carboxylate (14a) :**

##

## 1H NMR (300 MHz, CDCl3): *δ* = 1.20 (t, *J* = 7.0 Hz, 6H), 1.48 (s, 10H), 1.56 – 1.64 (m, 1H), 1.75 – 1.93 (m, 2H), 2.09 – 2.21 (m, 1H), 2.73 – 2.92 (m, 2H), 3.03 – 3.17 (m, 1H), 3.60 (q, *J* = 7.0 Hz, 4H), 4.16 – 4.25 (m, 1H), 4.32 – 4.45 (m, 1H), 5.24 – 5.29 (m, 4H), 6.44 (s, 1H), 8.17 (s, 2H), 8.20 (s, 1H) ppm

## HRMS (APCI): calculated for C25H37N7O4 [M+H]+ :500.2980, found 500.2990

## IR (ν˜max, neat) = 2924, 2854, 1677, 1637, 1590, 1543, 1465, 1419, 1389. 1378, 1365, 1298, 1256, 1241, 1149, 1073, 1006, 915, 729, 647 cm-1

## 5-(piperidin-3-yl)-3-(1H-pyrazol-4-yl) pyrazolo [1, 5-a] pyrimidin-7-amine(15):

To a solution of **14** (0.640 g, 1.06 mmol) and **14a** (0.500 g, 1.00 mmol) in ethanol (30 mL) was added aqueous 3 M HCl (20 mL). The reaction mixture was stirred at 60 °C for 3 hours, then the solvents were evaporated under reduced pressure. The residue was dissolved 7 M NH3 in MeOH (30 mL) and the mixture was stirred at 25 °C for 2 hours. The reaction mixture was concentrated under reduced pressure and the residue was purified by flash column chromatography (CH2Cl2 : 7 M NH3 in MeOH / 65 : 35) to afford **15** (0.370 g, 68 %) as a pale yellow solid.

1H NMR (500 MHz, DMSO-*d6*): *δ* = 1.68 – 1.79 (m, 1H), 1.80 – 1.92 (m, 2H), 2.00 – 2.12 (m, 1H), 2.89 – 3.01 (m, 1H), 3.07 – 3.16 (m, 1H), 3.20 – 3.29 (m, 2H), 3.46 – 3.56 (m, 1H), 6.03 (s, 1H), 7.74 (s, 2H), 8.09 (s, 2H), 8.35 (s, 1H), 9.03 (s, 1H), 12.83 (s, 1H) ppm

13C NMR (126 MHz, DMSO-*d6*): *δ* = 21.8, 28.5, 43.0, 46.4, 85.7, 100.9, 112.3, 140.8, 144.2, 148.1, 160.5 ppm

HRMS (ESI): calculated for C14H17N7 [M+H]+ : 284.1618, found 284.1623

## IR (ν˜max, neat) = 3304, 3171, 3033, 2956, 2684, 2552, 2415, 1648, 1631, 1593, 1561, 1476, 1337, 1273, 1255, 1191, 1177, 1129, 1046, 1037, 947, 916, 892, 752, 560, 510, 448 cm-1

m.p = 302 – 305 °C

***tert*-butyl 3-(3-(1-(tert-butoxycarbonyl)-1H-pyrazol-4-yl)-7-((tert-butoxycarbonyl) amino)pyrazolo[1,5-a]pyrimidin-5-yl)piperidine-1-carboxylate (16):**

Di-tert-butyl dicarbonate (0.838 g, 3.84 mmol) was added to a mixture of **15** (0.340 g, 1.20 mmol), triethylamine (1.00 mL, 7.20 mmol) and DMAP (0.015g, 0.120 mmol) in dichloromethane (15 mL) and the mixture was stirred at 25 °C for 24 hours. The resulting solution was mixed with aqueous saturated NaHCO3 (25 mL) and the mixture was extracted with CH2Cl2 (2 × 100 mL). The organic extracts were dried over MgSO4, filtered, and concentrated under reduced pressure. The residue was purified by flash column chromatography (hexane : EtOAc / 60 : 40) to afford **16** (0.450 g, 64 %) as a white solid.

1H NMR (500 MHz, DMSO-*d6*) *δ* = 1.31 – 1.36 (m, 1H), 1.38 (s, 9H), 1.47 – 1.52 (m, 1H), 1.54 (s,9H), 1.62 (s, 9H), 1.75 – 1.89 (m, 2H), 2.06 – 2.14 (m, 1H), 2.86 – 2.95 (m, 2H), 3.83 – 3.96 (m, 1H), 4.05 – 4.33 (m, 1H), 7.39 (s, 1H), 8.41 (s, 1H), 8.64 (s, 1H), 8.73 (s, 1H), 9.87 (s, 1H) ppm

13C NMR (126 MHz, DMSO-*d6*): *δ* = 27.4, 27.7, 28.0, 29.4, 43.2, 78.6, 82.2, 84.7, 92.9, 100.1, 115.9, 125.5, 141.3, 141.7, 144.2, 147.0, 151.1, 153.9, 164.0 ppm

HRMS (ESI): calculated for C29H41N7O6 [M+H]+ :584.3191 and [2M+Na]+: 1189.6129, found 584.3201 and 1189.6144

## IR (ν˜max, neat) = 3151, 2976, 2933, 2856, 1769, 1743, 1689, 1558, 1459, 1391, 1367, 1318, 1287, 1248, 1139, 1010, 953, 916, 830, 765, 653 cm-1

## m.p. = 133 – 136 °C

## *tert*-butyl-3-(6-bromo-3-(1-(tert-butoxycarbonyl)-1H-pyrazol-4-yl)-7-((tert-butoxy carbonyl)amino)pyrazolo[1,5-a]pyrimidin-5-yl)piperidine-1-carboxylate(17):

A solution of Br2 (0.025mL, 0.487 mmol) in CH2Cl2 (5 mL) was added dropwise to a stirred solution of **16** (0.290 g, 0.496 mmol) and *t*-BuNH2 (5 mL) in CH2Cl2 (10 mL) and the resulting mixture was stirred at 25 °C for 16 hours. The reaction mixture was concentrated under reduced pressure and the residue was purified by flash column chromatography (CH2Cl2 : 7 M NH3 in MeOH / 90 : 10) to afford **17** (0.325 g, 98 %) as a yellow solid.

1H NMR (500 MHz, CDCl3): *δ* = 1.47 (s, 9H), 1.55 (s, 9H), 1.62 – 1.66 (m, 1H), 1.69 (s, 9H), 1.76 – 1.87 (m, 2H), 2.16 – 2.23 (m, 1H), 2.65 – 2.85 (m, 1H), 3.06 – 3.14 (m, 1H), 3.34 – 3.45 (m, 1H), 4.10 – 4.30 (m, 1H), 4.31 – 4.55 (m, 1H), 7.51 (s, 1H), 8.22 (s, 1H), 8.25 (s, 1H), 8.58 (s, 1H) ppm

13C NMR (126 MHz, CDCl3): *δ* = 25.2, 28.1, 28.2, 28.6, 30.3, 43.2, 79.8, 83.6, 85.5, 100.2, 102.9, 115.5, 126.3, 138.7, 141.5, 142.2, 143.4, 147.8, 149.7, 154.8, 162.1 ppm

HRMS (ESI): calculated for C29H40BrN7O6 [M-H]- :660.2151, found 660.2165

## IR (ν˜max, neat) = 2976, 2931, 2858, 1743, 1691, 1596, 1529, 1456, 1409, 1390, 1367, 1289, 1241, 1143, 956, 920, 882, 841, 764, 730 cm-1

## m.p. = 121 – 123 °C

## 6-bromo-5-(piperidin-3-yl)-3-(1*H*-pyrazol-4-yl)pyrazolo[1,5-a]pyrimidin-7-amine (18):

TFA (1.7 mL, 22.08 mmol) was added dropwise to a solution of **17** (0.325 g, 0.490 mmol) in CH2Cl2 (15 mL) and the mixture was stirred at 25 °C for 2 hours. The solvents were evaporated under reduced pressure, the residue was dissolved in 7 M NH3 in MeOH (10 mL), and the mixture was stirred at 25 °C for 2 hours. The reaction mixture was concentrated under reduced pressure and the residue was purified by flash column chromatography (CH2Cl2 : 7 M NH3 in MeOH / 80 : 20) to afford **18** (0.100 g, 56 %) as a white solid.

1H NMR (500 MHz, DMSO-*d6*): *δ* = 1.49 – 1.59 (m, 1H), 1.67 – 1.83 (m, 2H), 1.95 – 2.03 (m, 1H), 2.54 – 2.62 (m, 1H), 2.75 – 2.85 (m, 1H), 2.95 – 3.03 (m, 1H), 3.10 – 3.23 (m, 3H), 7.84 (s, 2H), 8.10 (s, 2H), 8.36 (s, 1H), 12.79 (s, 1H) ppm

13C NMR (126 MHz, DMSO-*d6*): *δ* = 25.8, 29.4, 43.0, 45.9, 50.4, 58.2, 78.1, 83.1, 101.4, 112.0, 140.9, 142.3, 145.2, 159.9 ppm

HRMS (ESI): calculated for C14H16BrN7 [M+H]+:362.0723, found 362.0722

## IR (ν˜max, neat) = 3286, 3272, 3138, 2930, 2854, 1676, 1637, 1615, 1582, 1537, 1461, 1400, 1321, 1344, 1272, 1244, 1201, 1186, 1126, 1103, 939, 861, 841, 800, 619, 517 cm-1

## m.p. = 90 – 93 °C

**Separation of enantiomers of racemic compound 18:**

Column : semipreparative Chiralpak-AD (particle size 5 m, 22x250 mm)

Injection Volume : 3 mL (a solution of 12 mg of compound **18** in 1.5 mL of 2-propanol and 1.5 mL *n*-Hexane)

Flow Rate : 8 mL/min

Mobile Phase : *n*-hexane/IPA 80 : 20 + 0.1 % DEA

The slow eluting compound is the required R enantiomer (compound **MU379**).


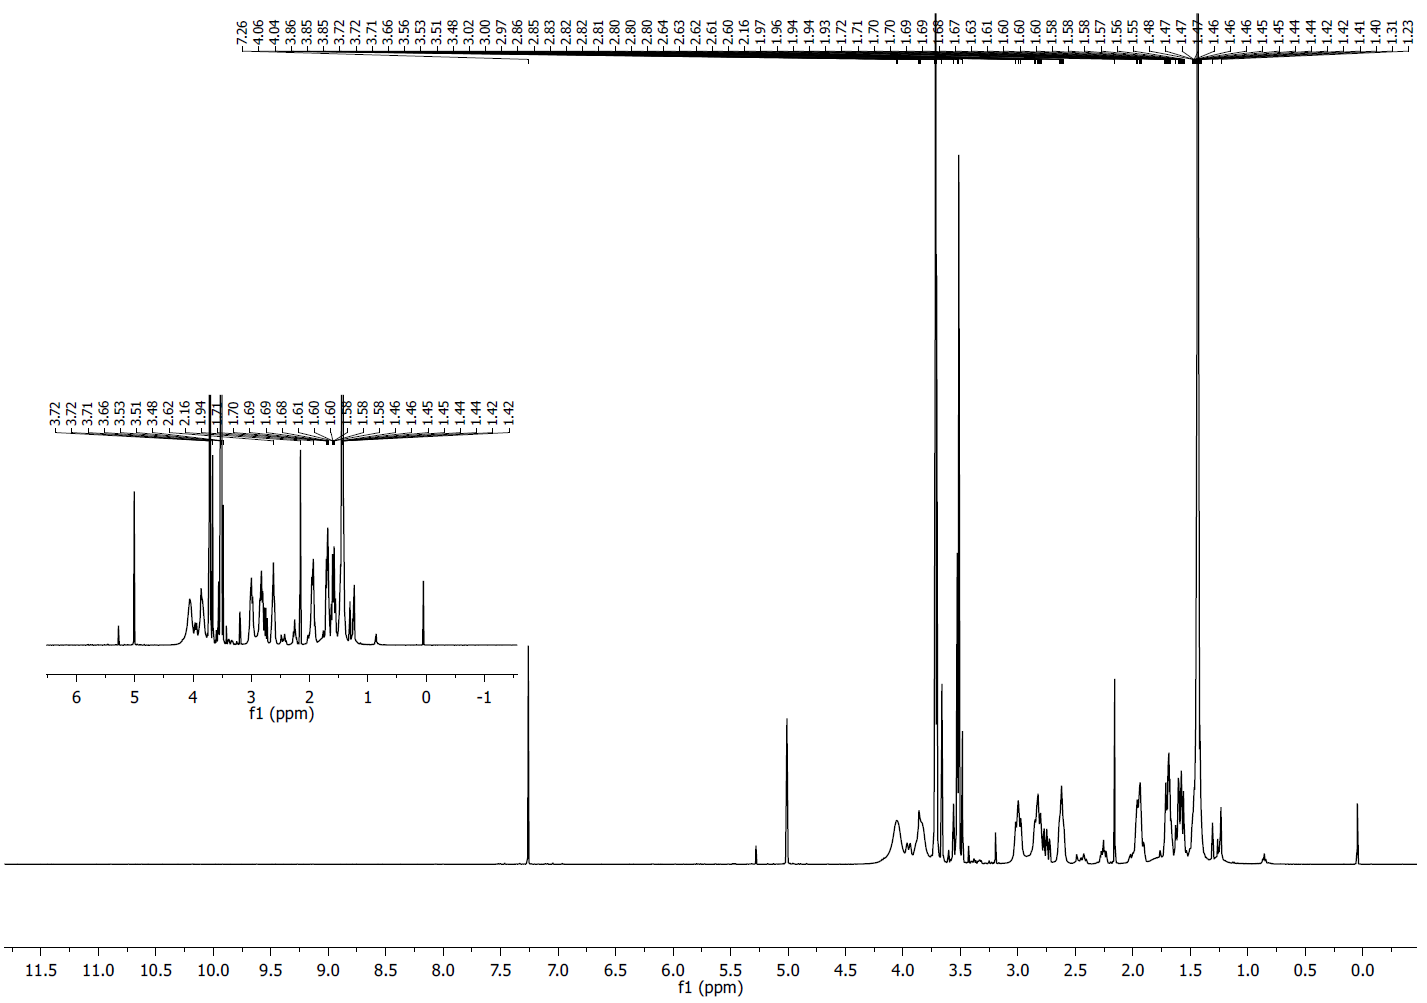


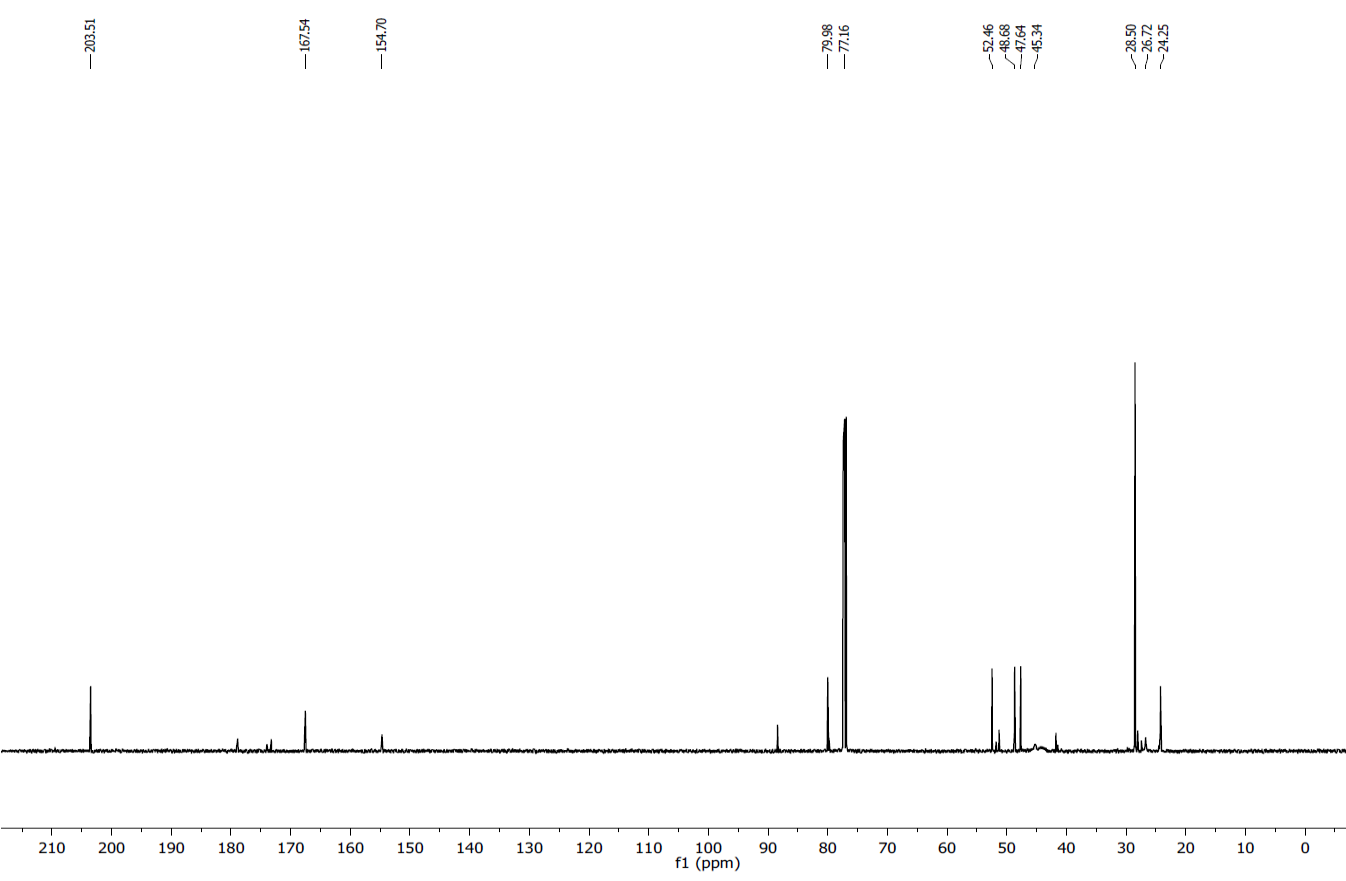
1H NMR (500MHz) spectrum of compound **1** in CDCl3

13C NMR (126 MHz) spectrum of compound **1** in CDCl3

HRMS of compound **1**


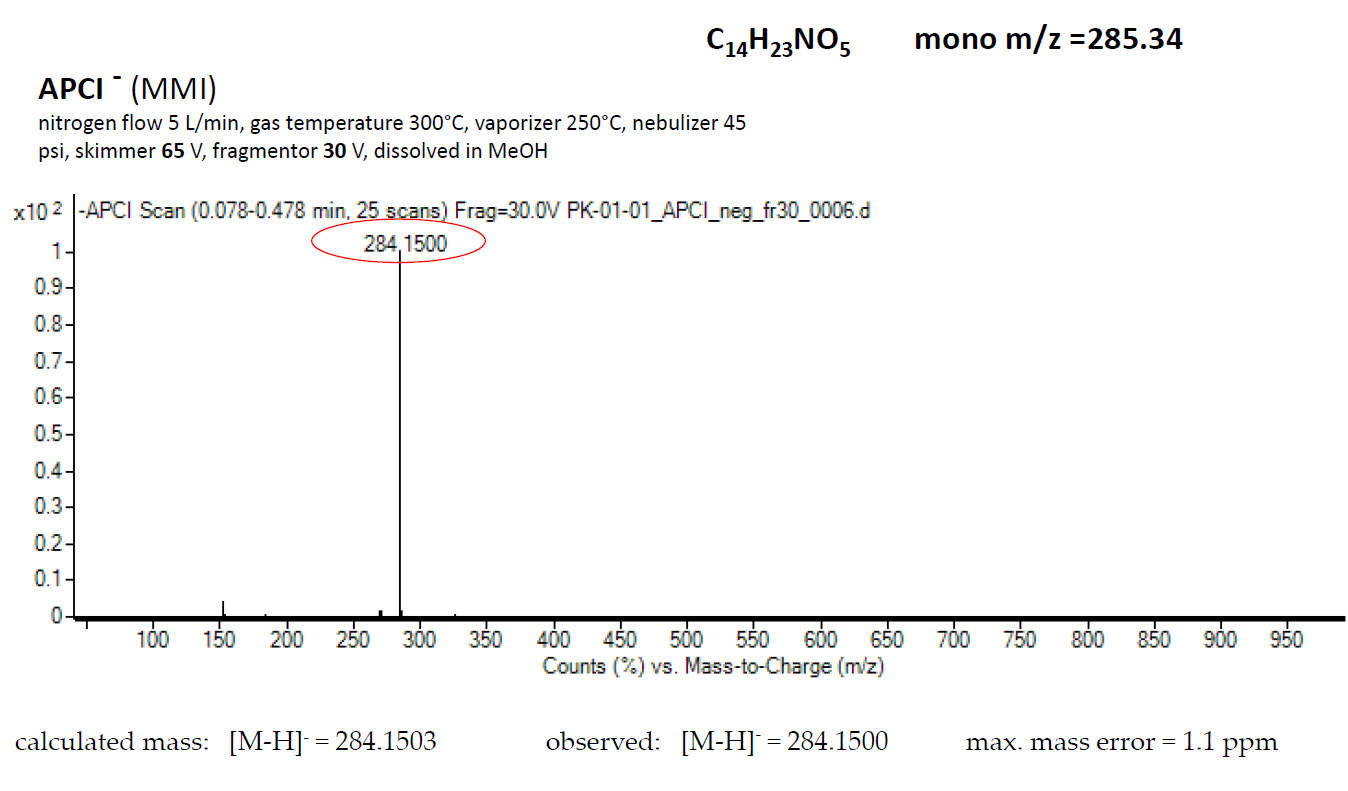

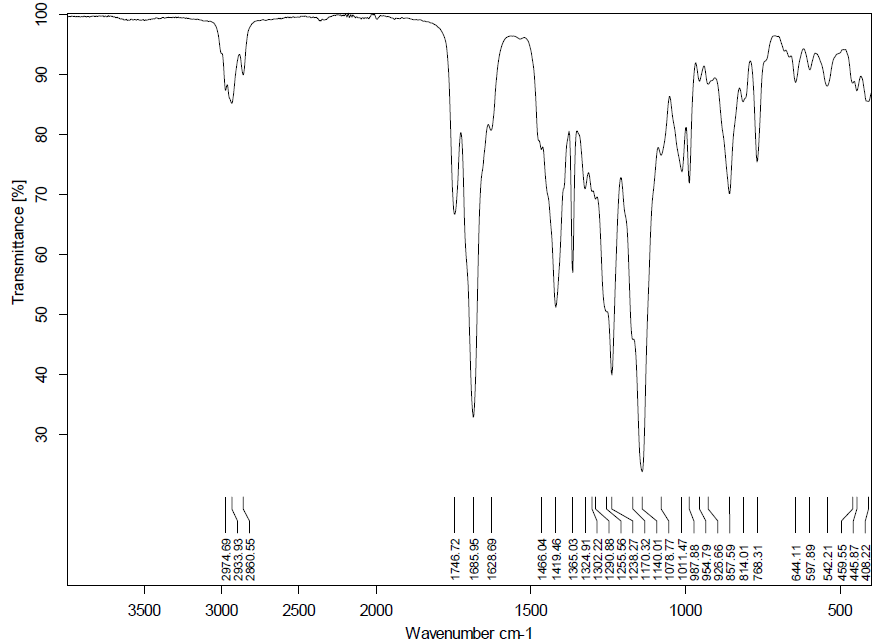


IR spectrum of compound **1**


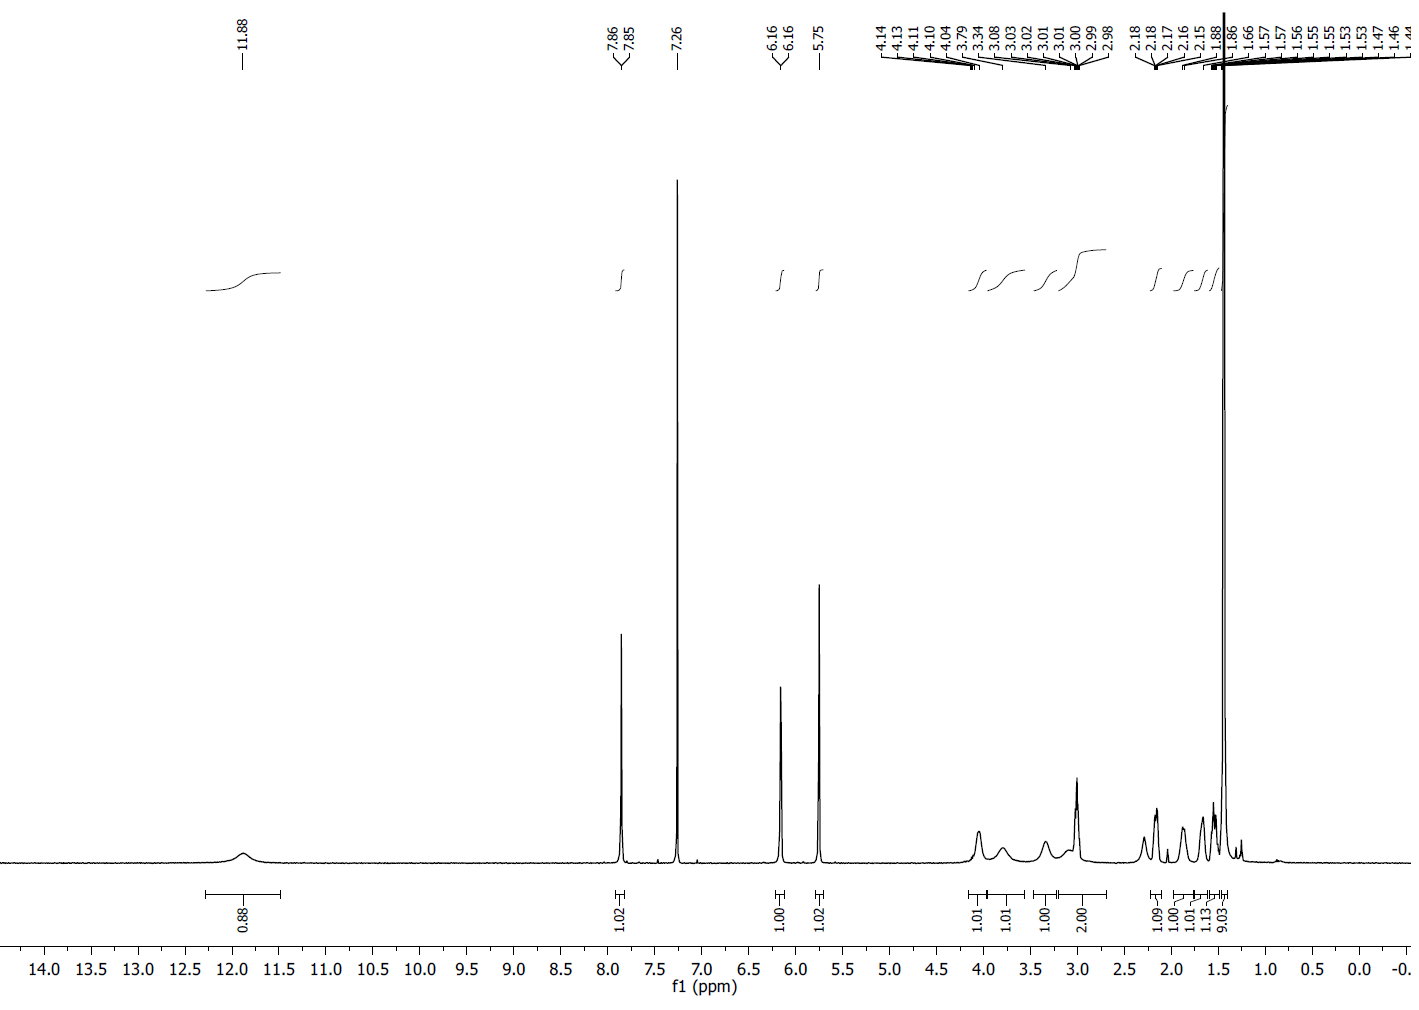


1H NMR (500MHz) spectrum of compound **2** in CDCl3


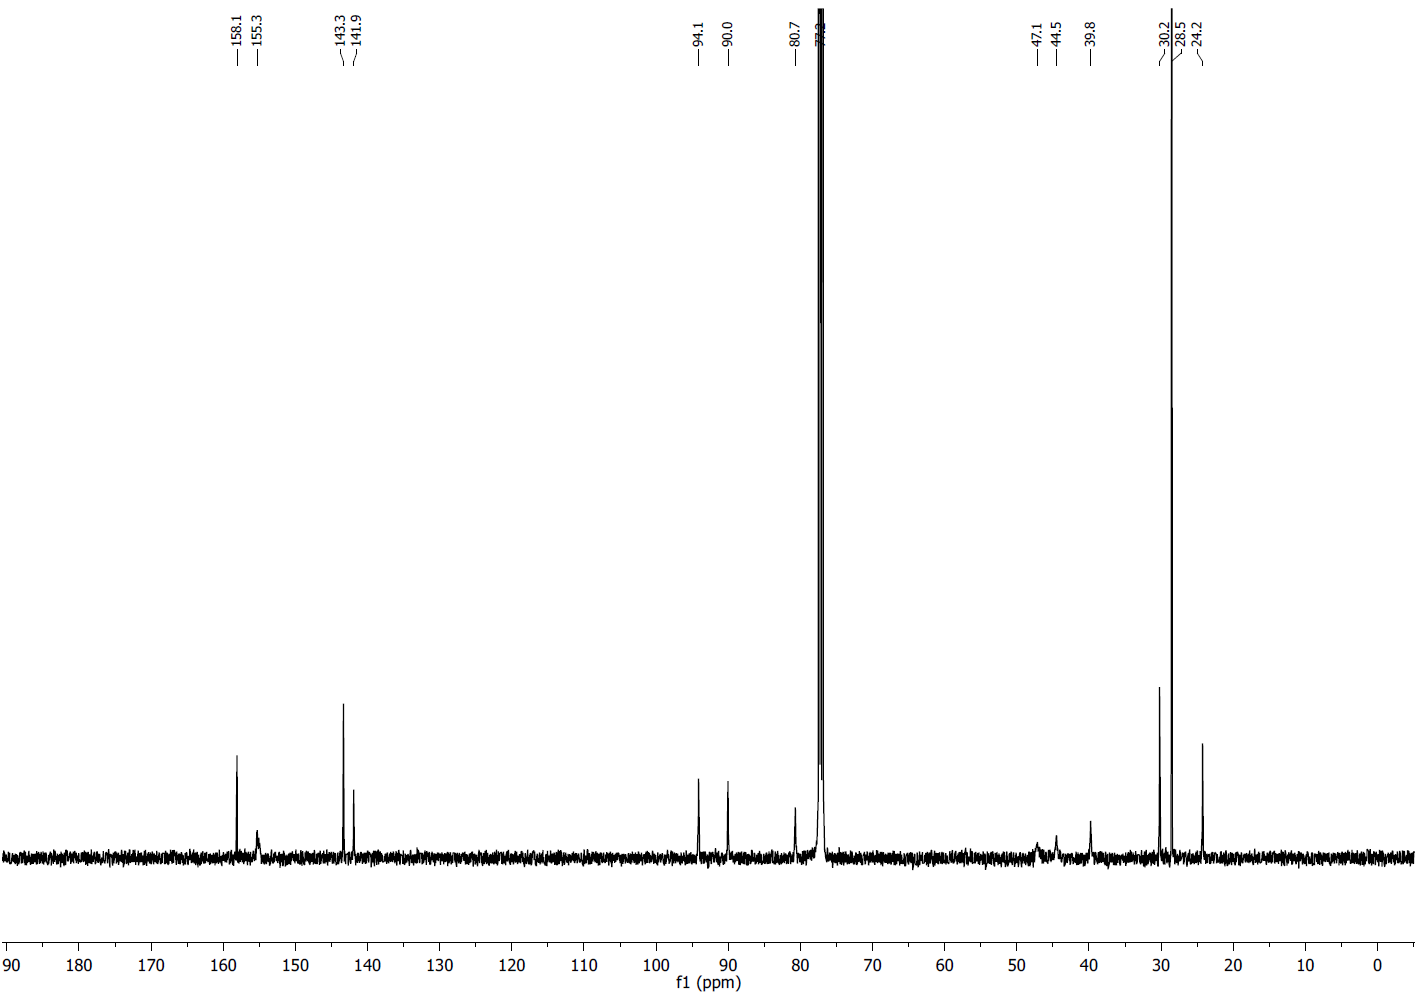


13C NMR (126 MHz) spectrum of compound **2** in CDCl3


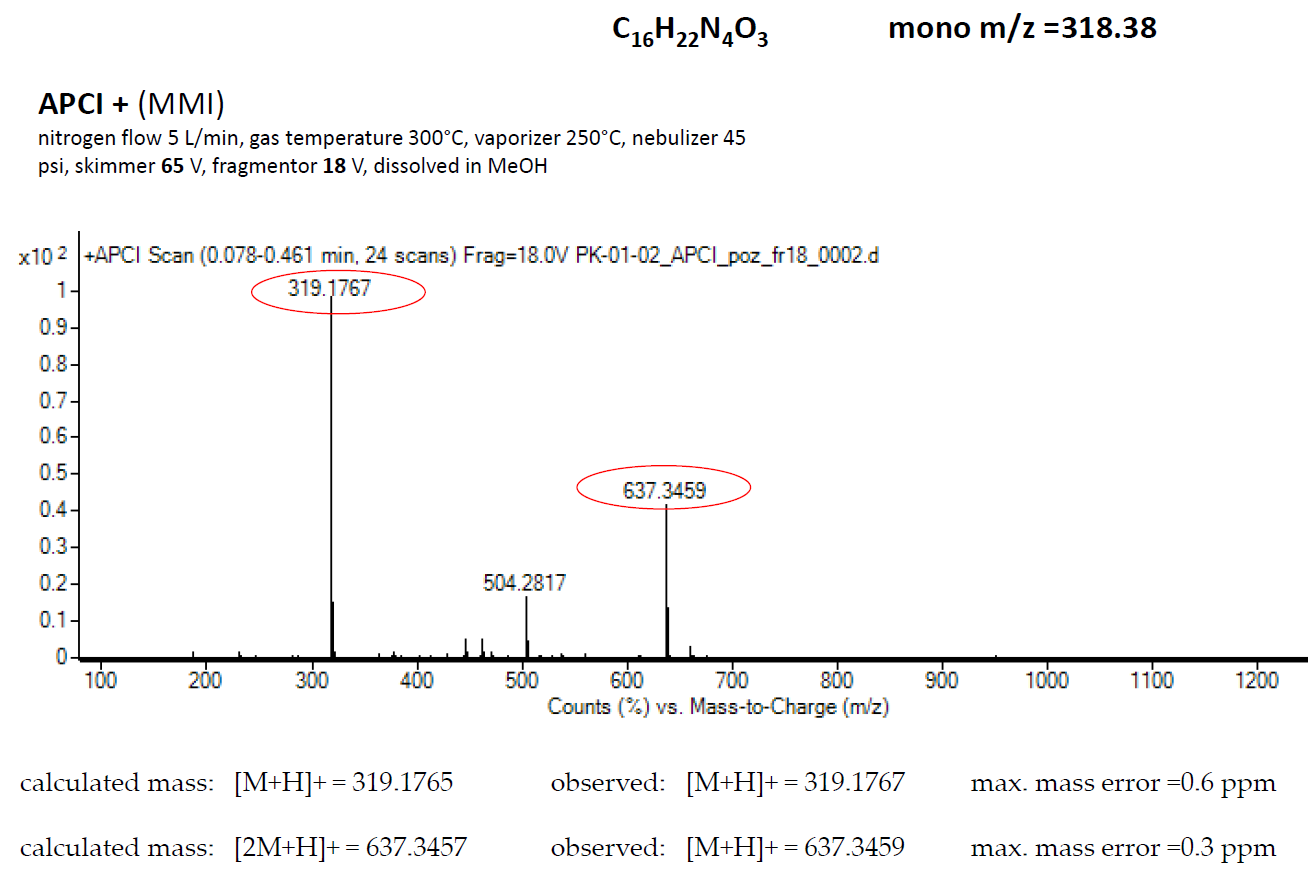


HRMS of compound **2**

IR spectrum of compound **2**


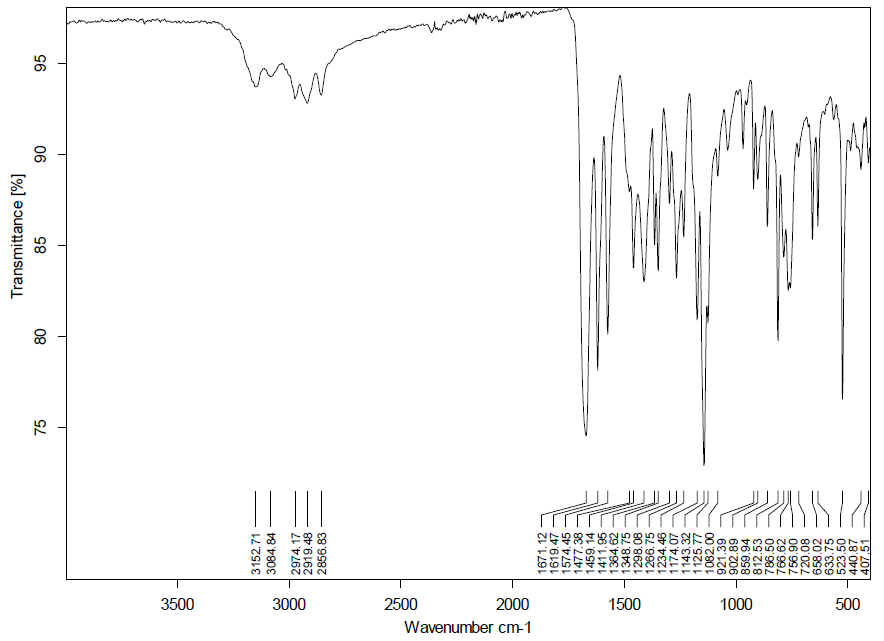

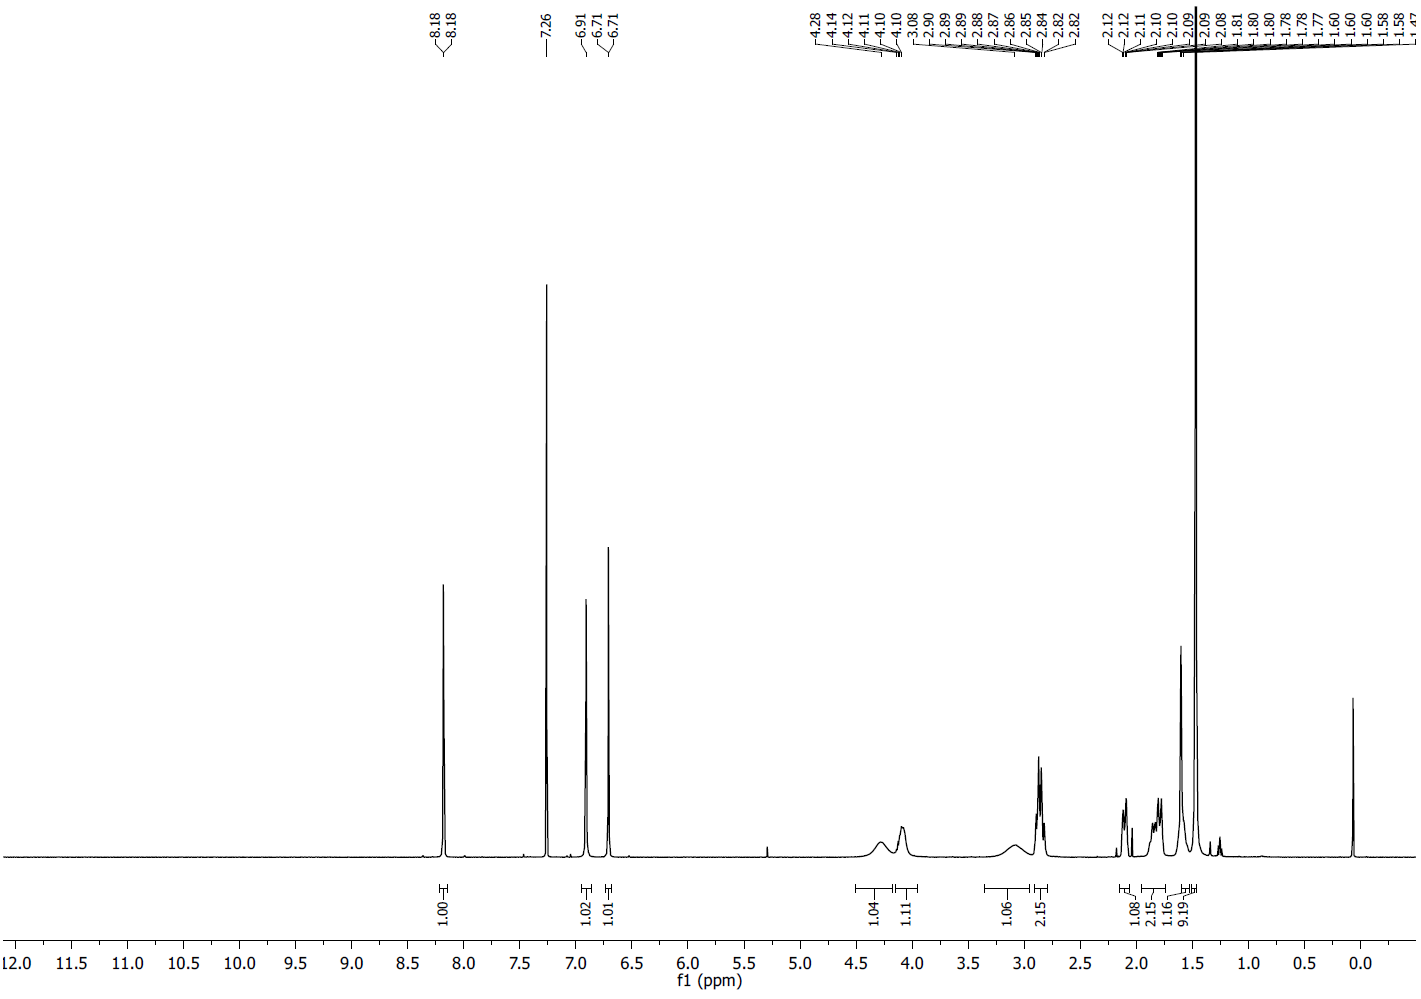


1H NMR (500MHz) spectrum of compound **3** in CDCl3


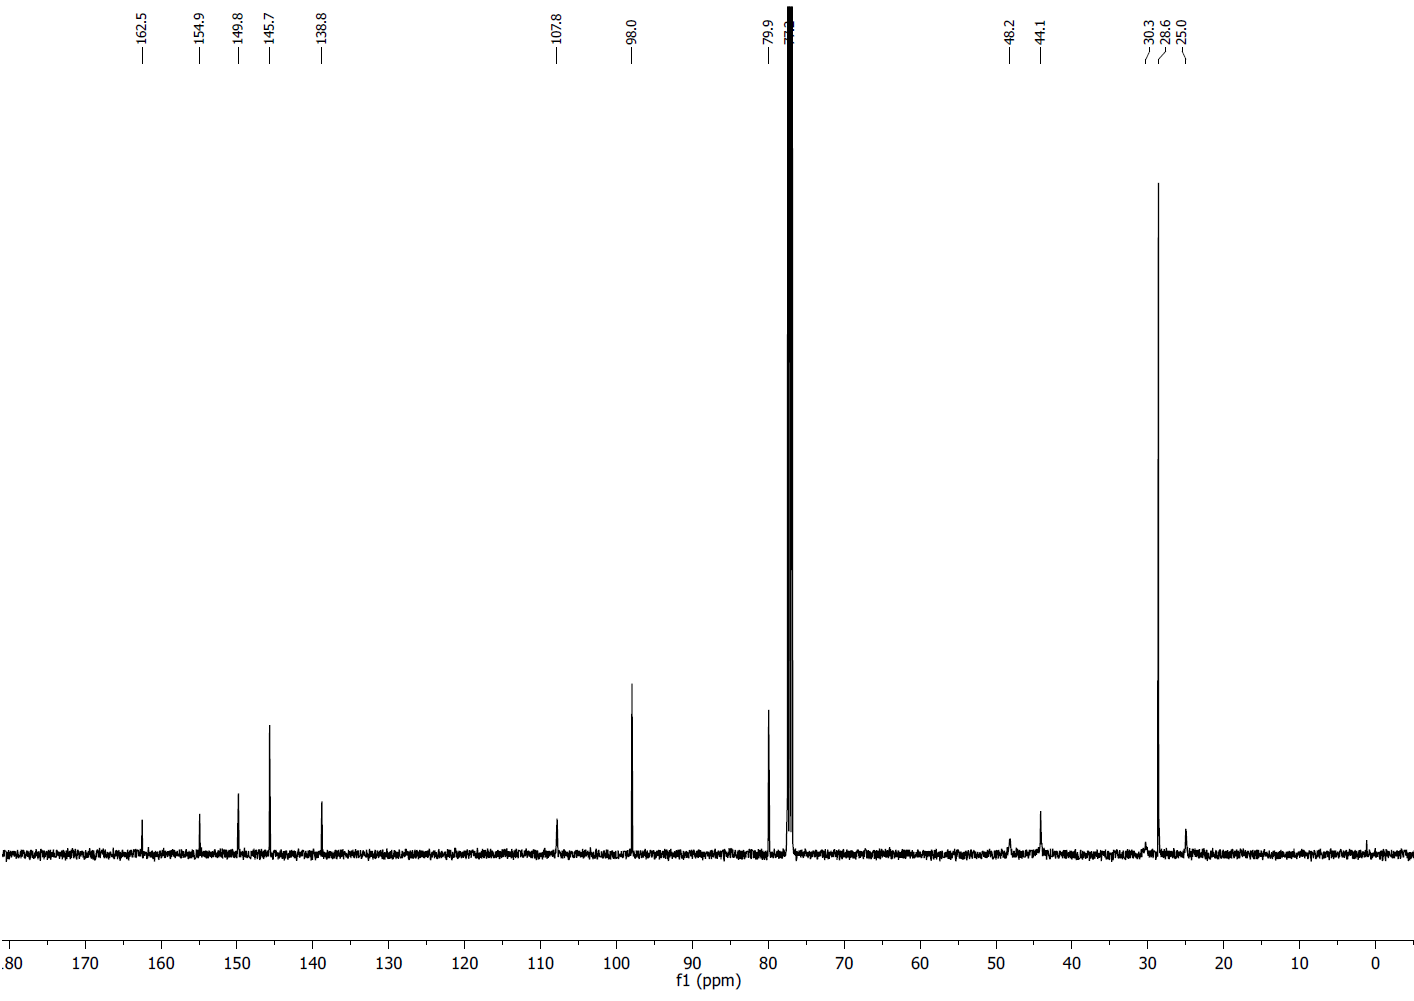


13C NMR (126 MHz) spectrum of compound **3** in CDCl3


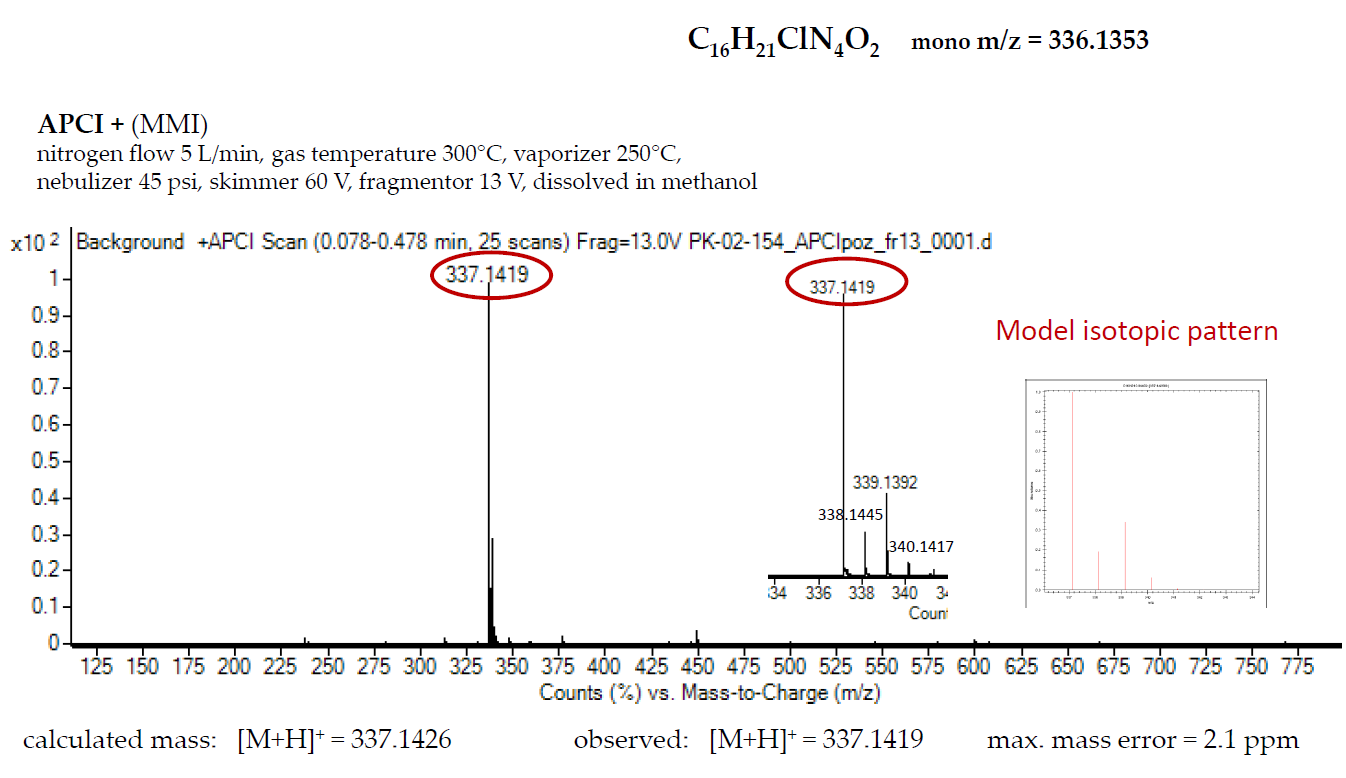


HRMS of compound **3**


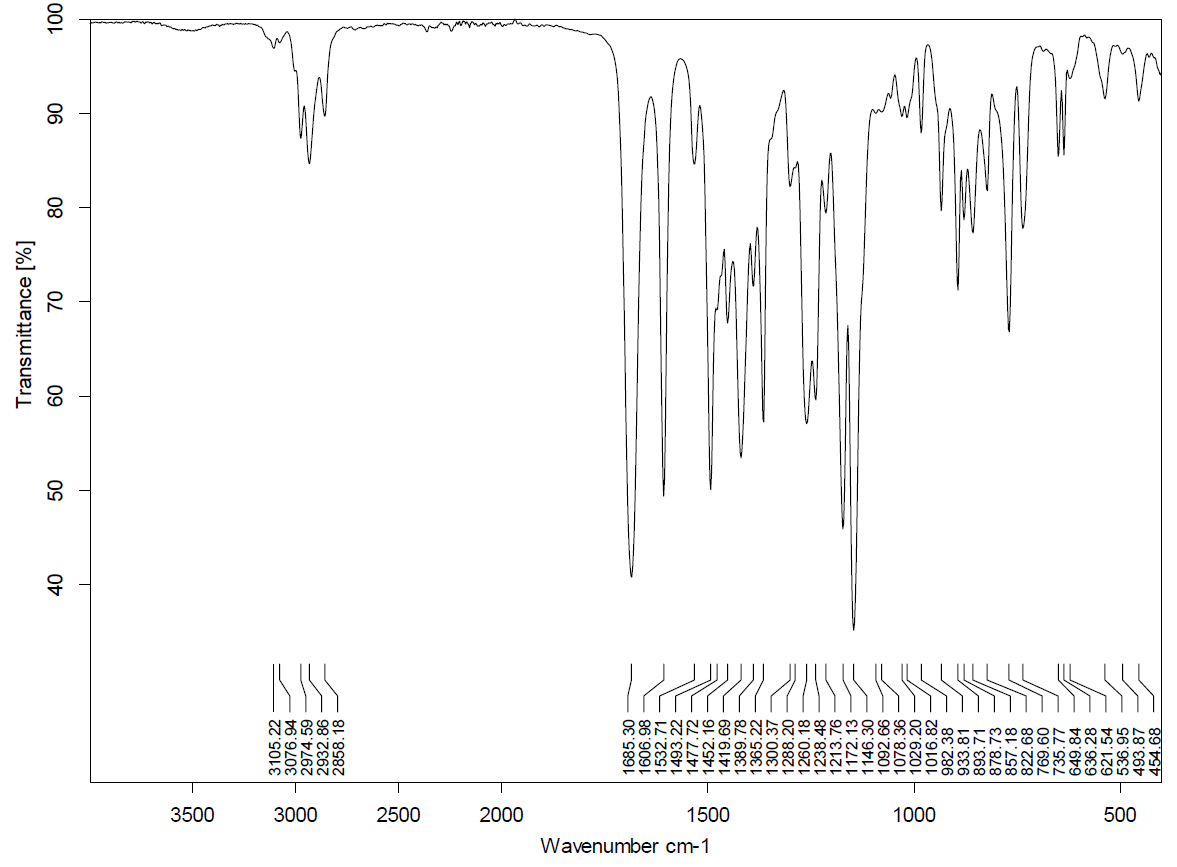


IR spectrum of compound **3**


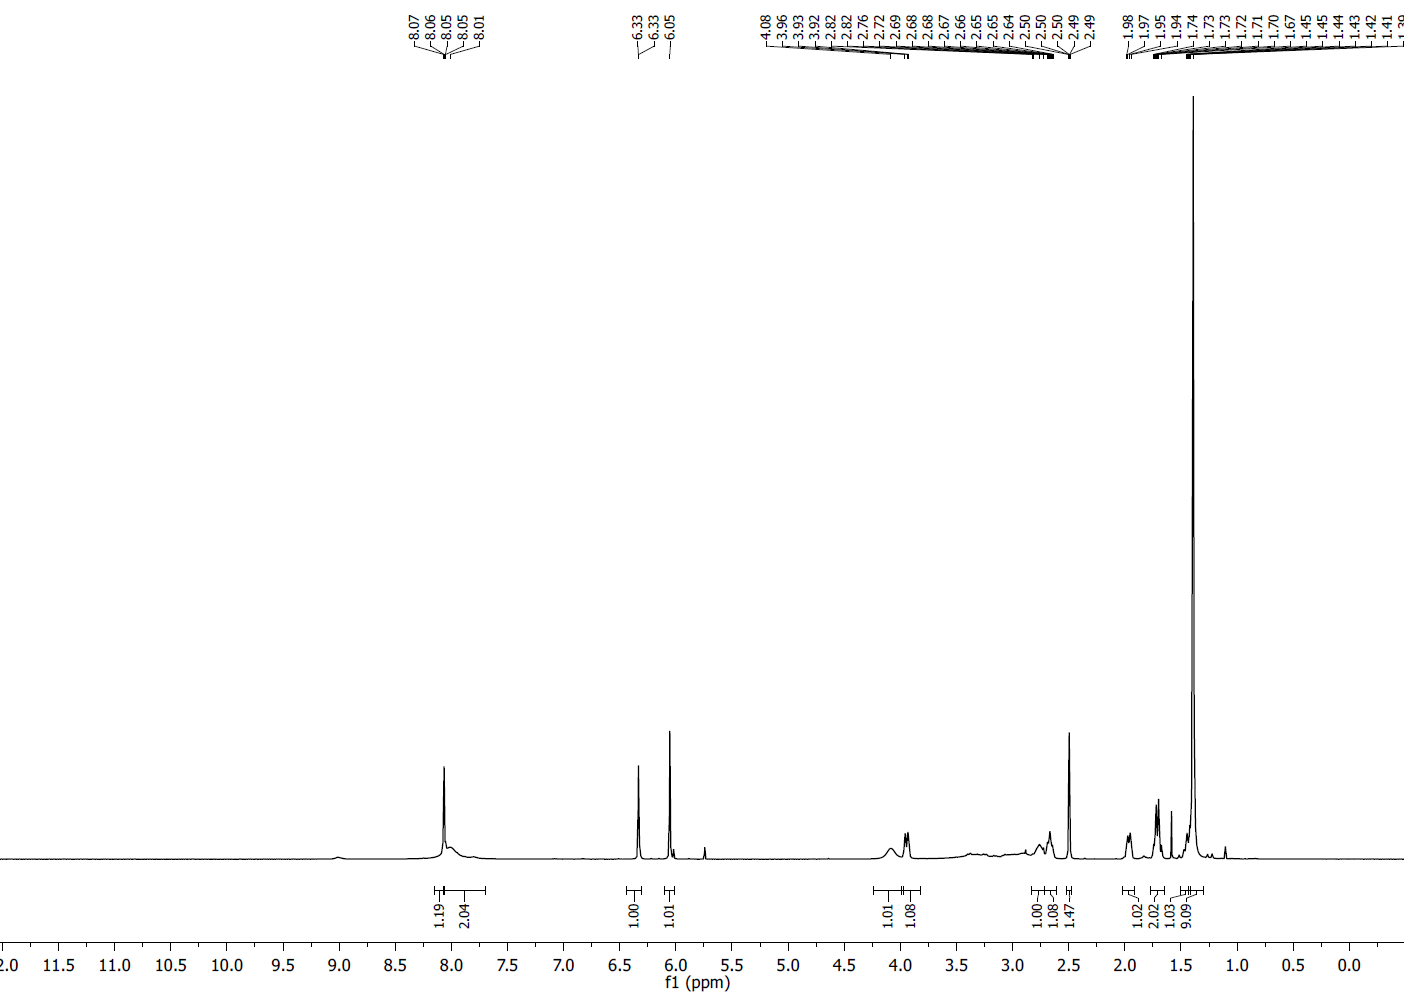


1H NMR (500MHz) spectrum of compound **4** in DMSO-*d6*


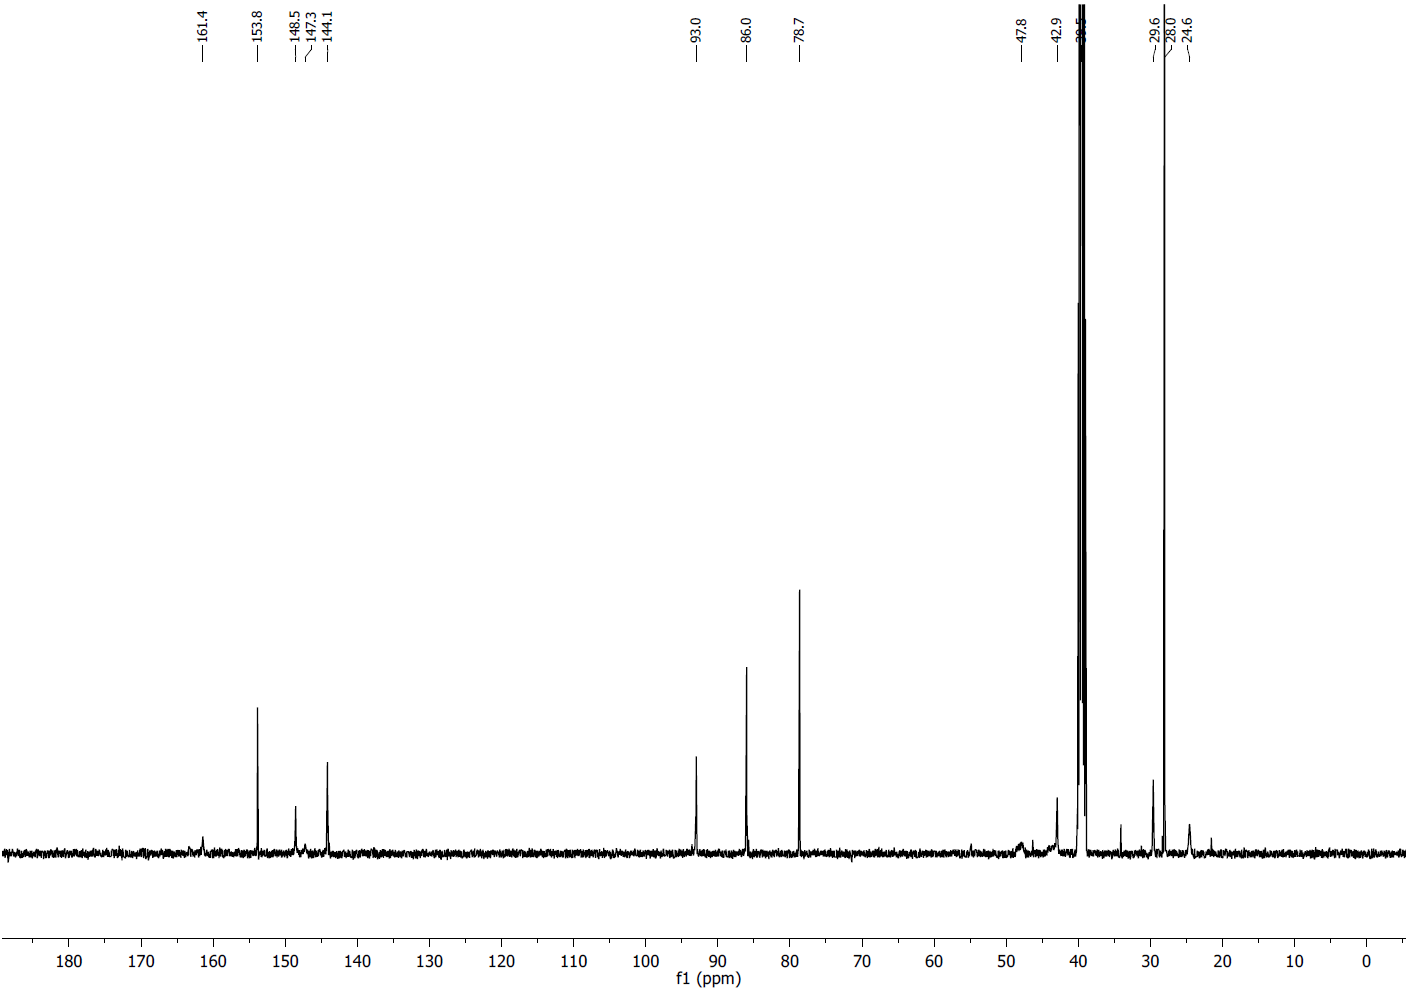


13C NMR (126 MHz) spectrum of compound **4** in DMSO-*d6*

HRMS of compound **4**


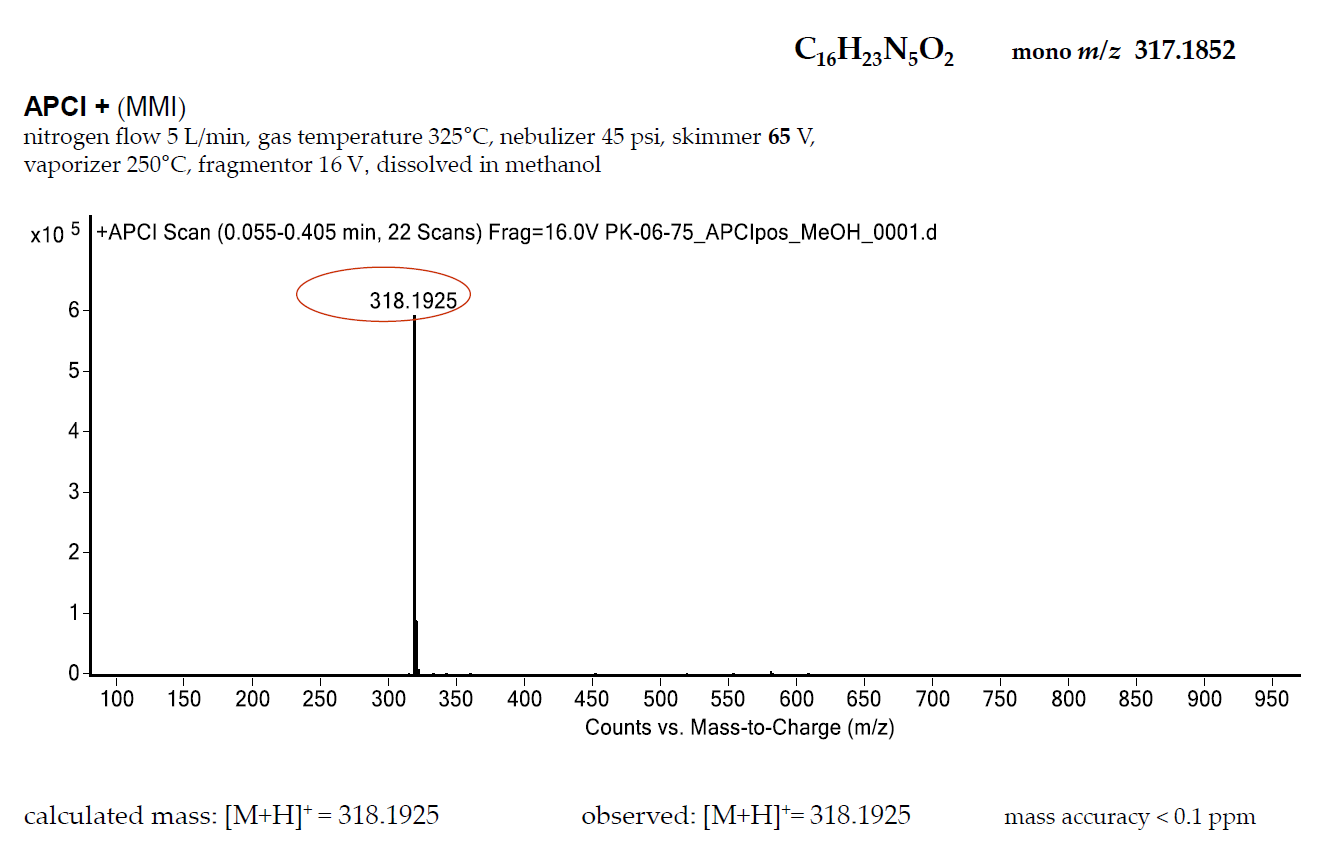


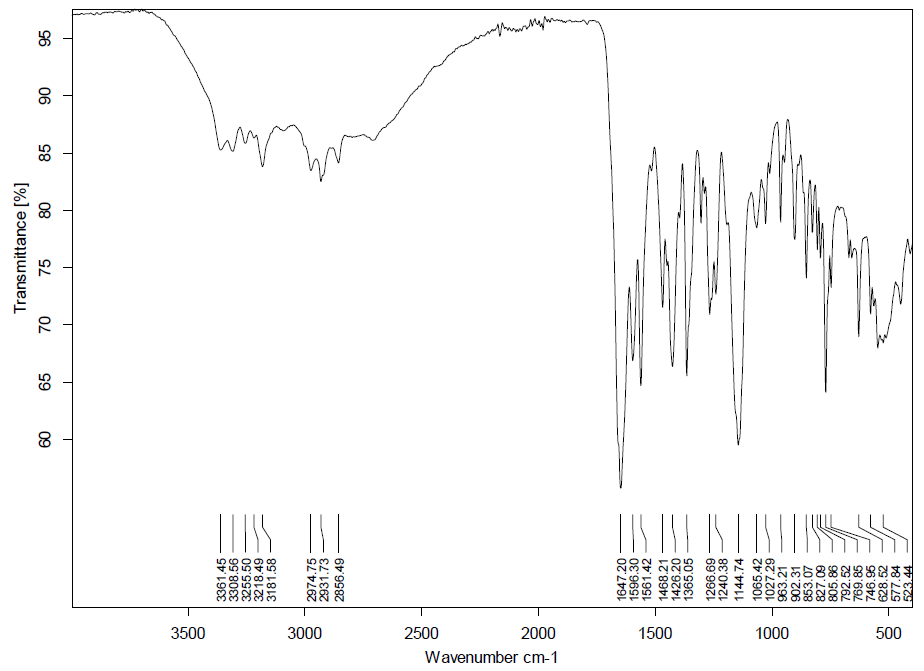
 IR spectrum of compound **4**


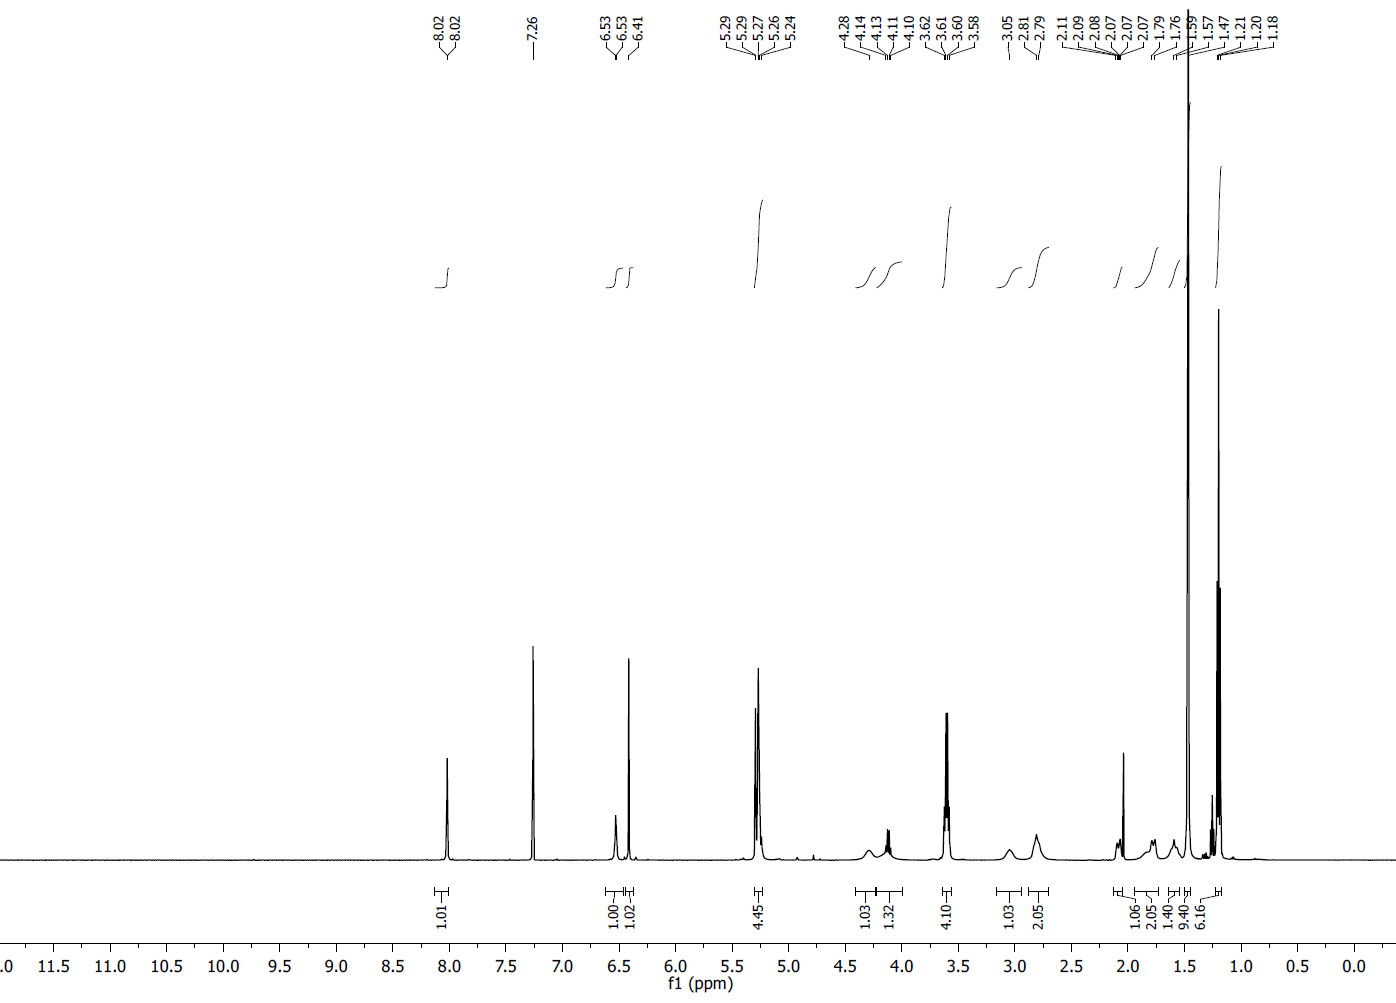


1H NMR (500MHz) spectrum of compound **5** in CDCl3


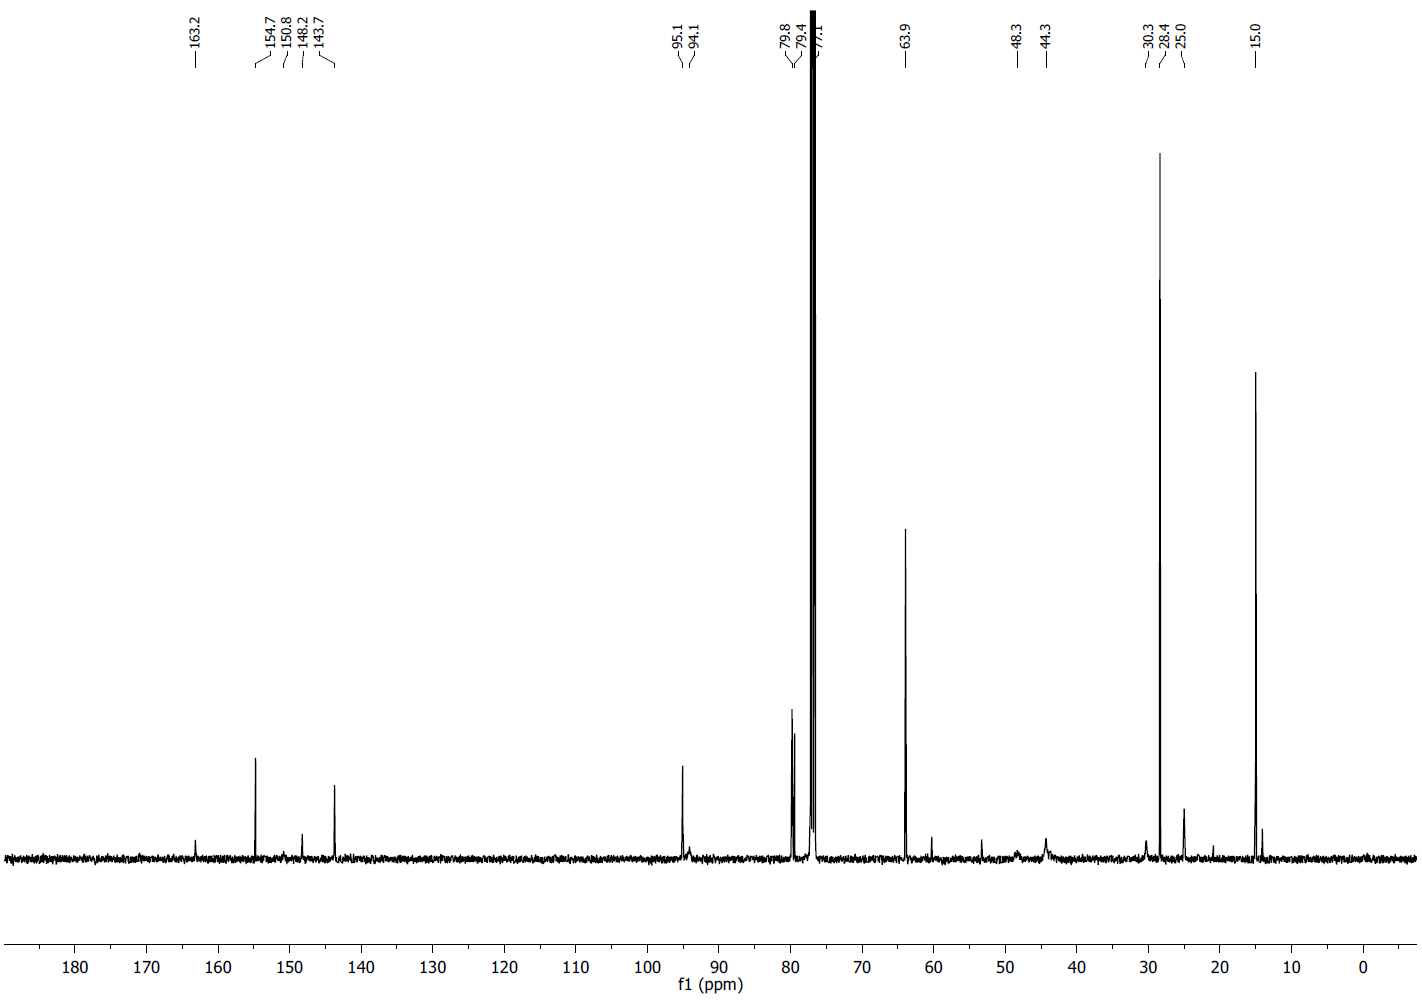


13C NMR (126 MHz) spectrum of compound **5** in CDCl3

HRMS of compound **5**


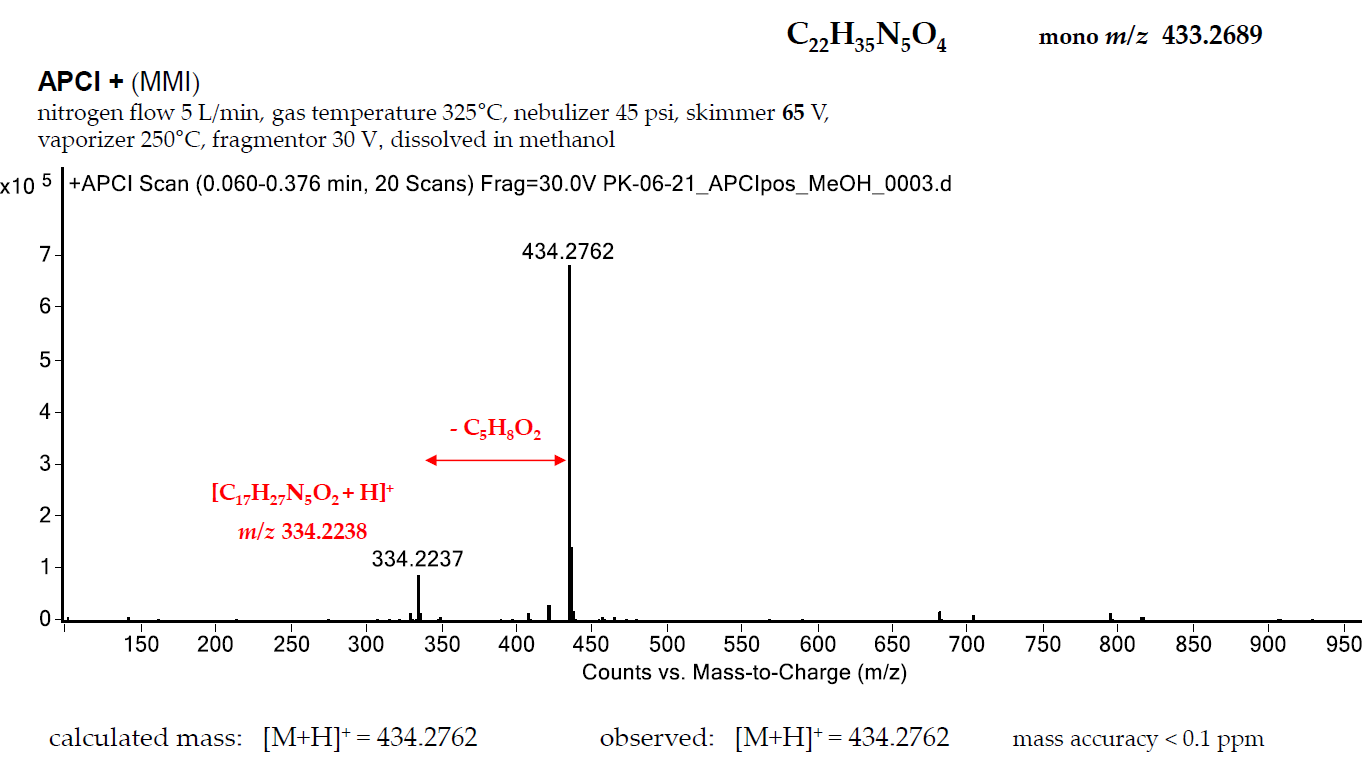


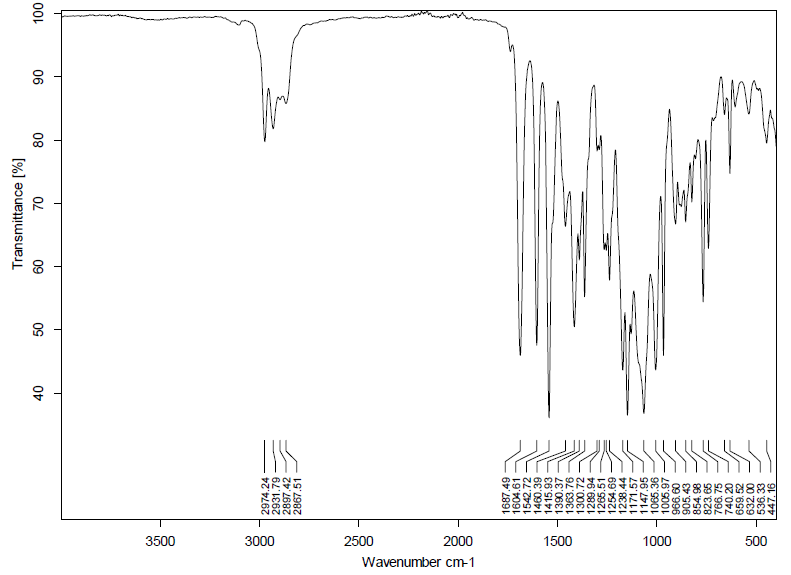
 IR spectrum of compound **5**

1H NMR (500MHz) spectrum of compound **6** in CDCl3


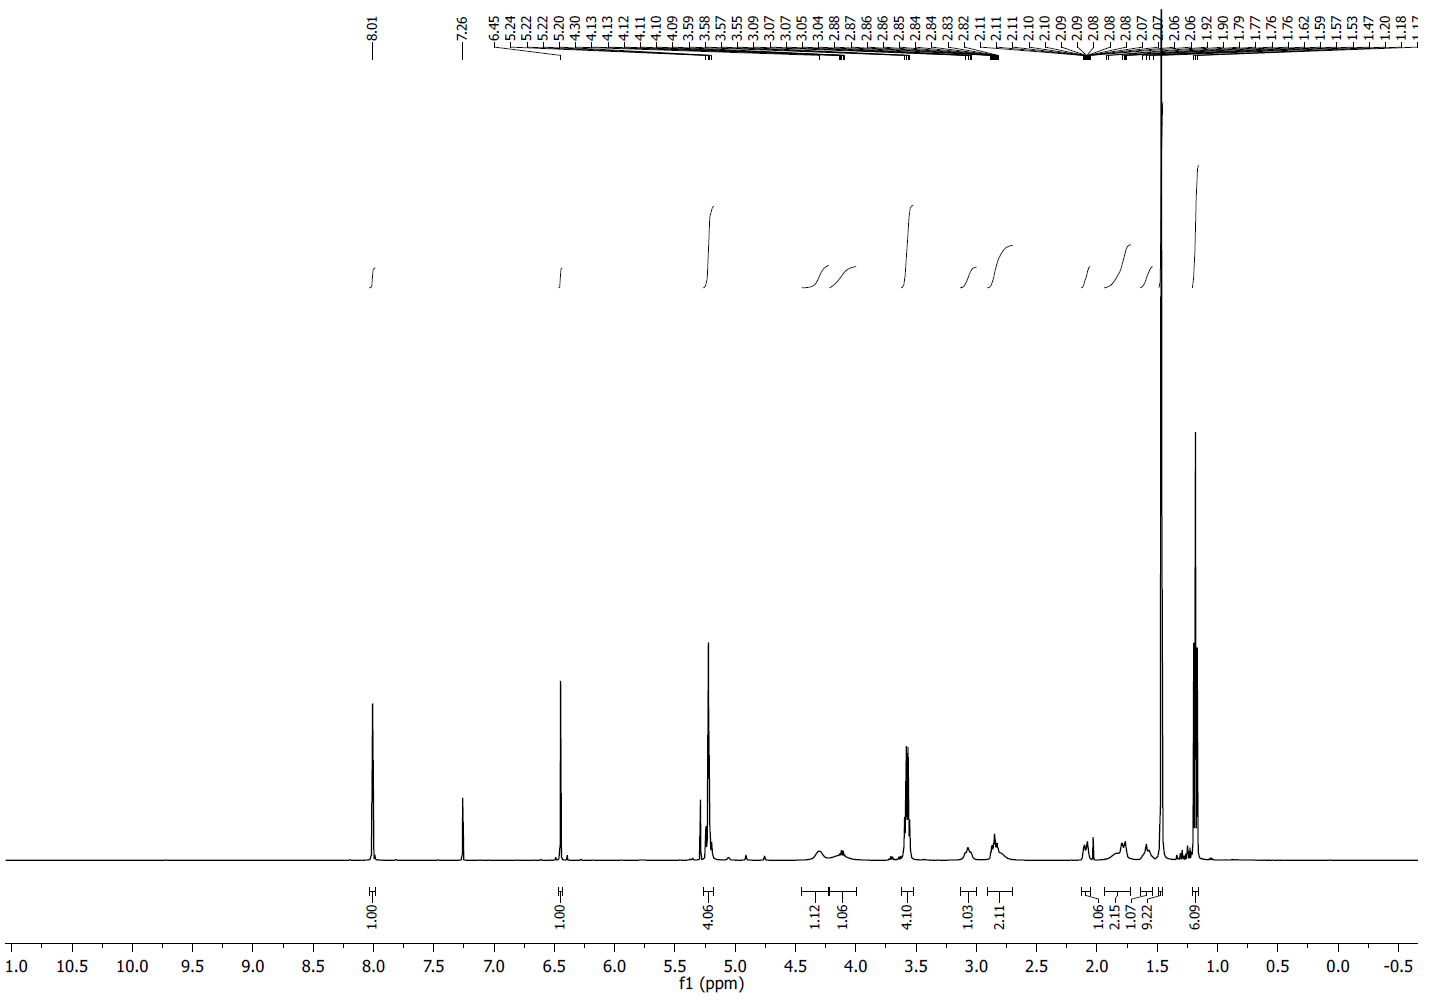


13C NMR (126 MHz) spectrum of compound **6** in CDCl3


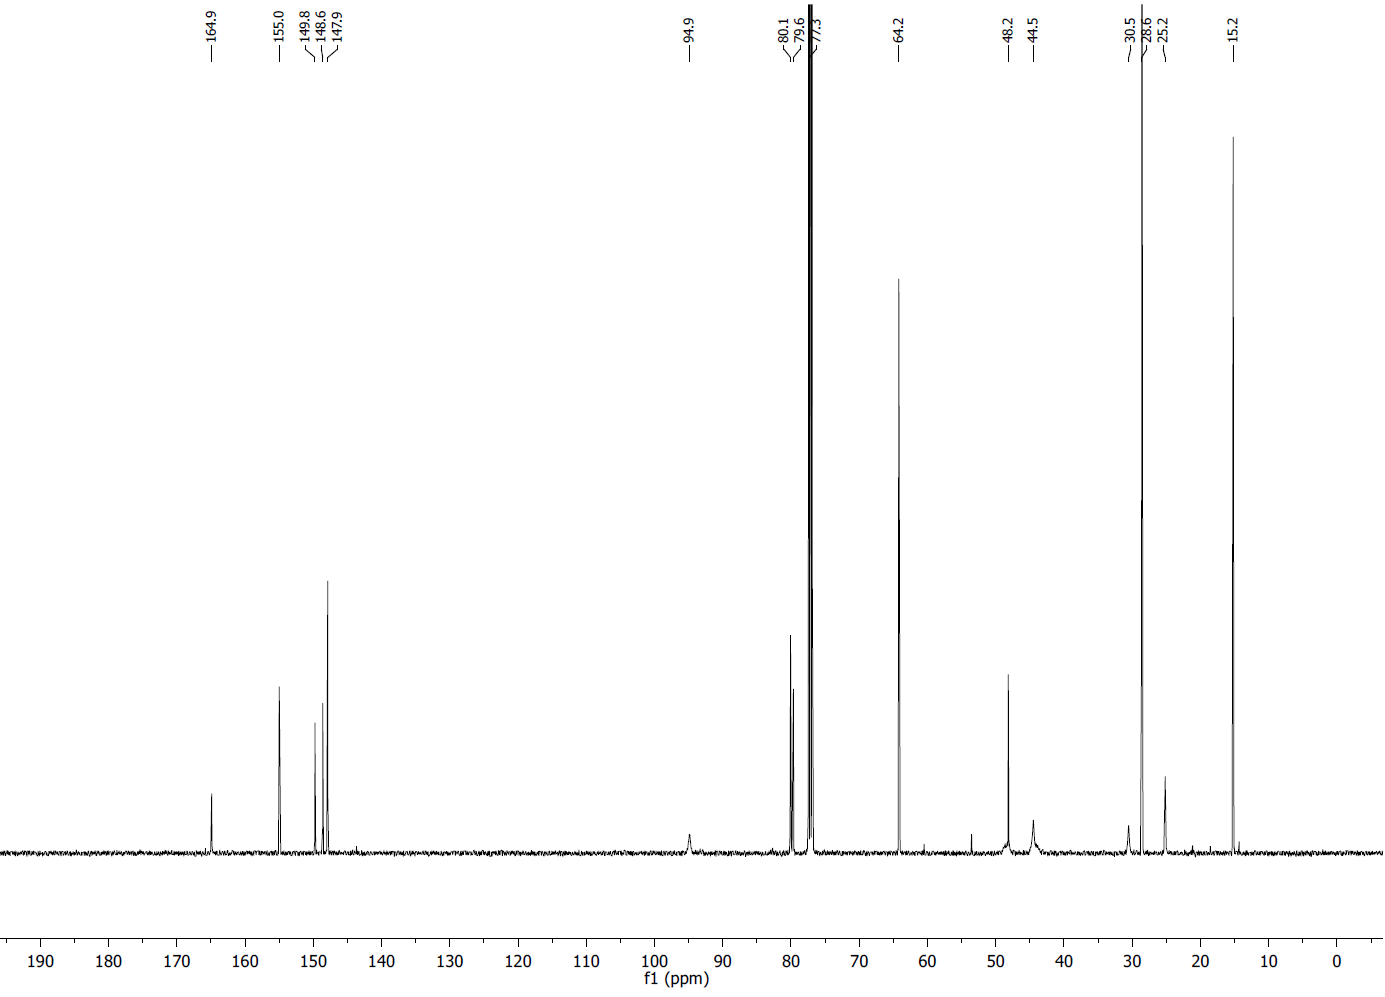


HRMS of compound **6**


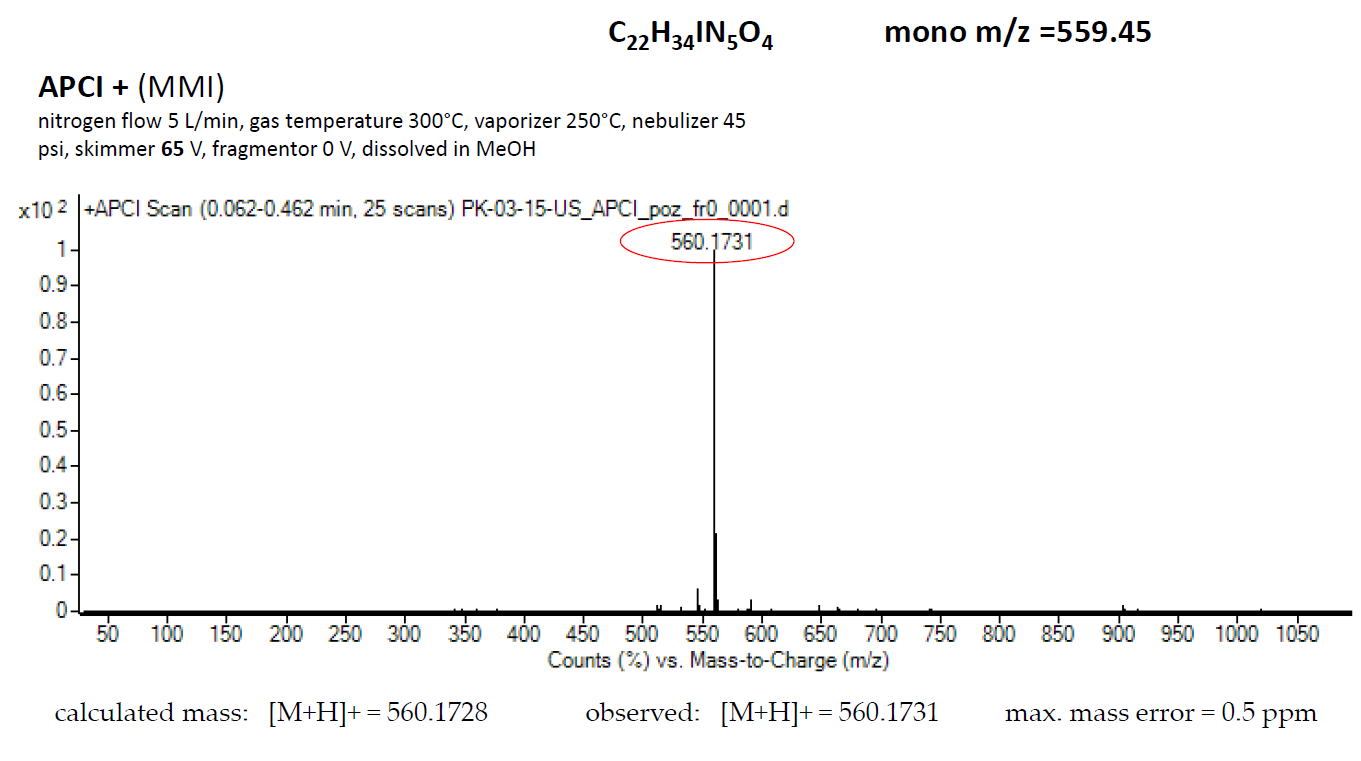


IR spectrum of compound **6**


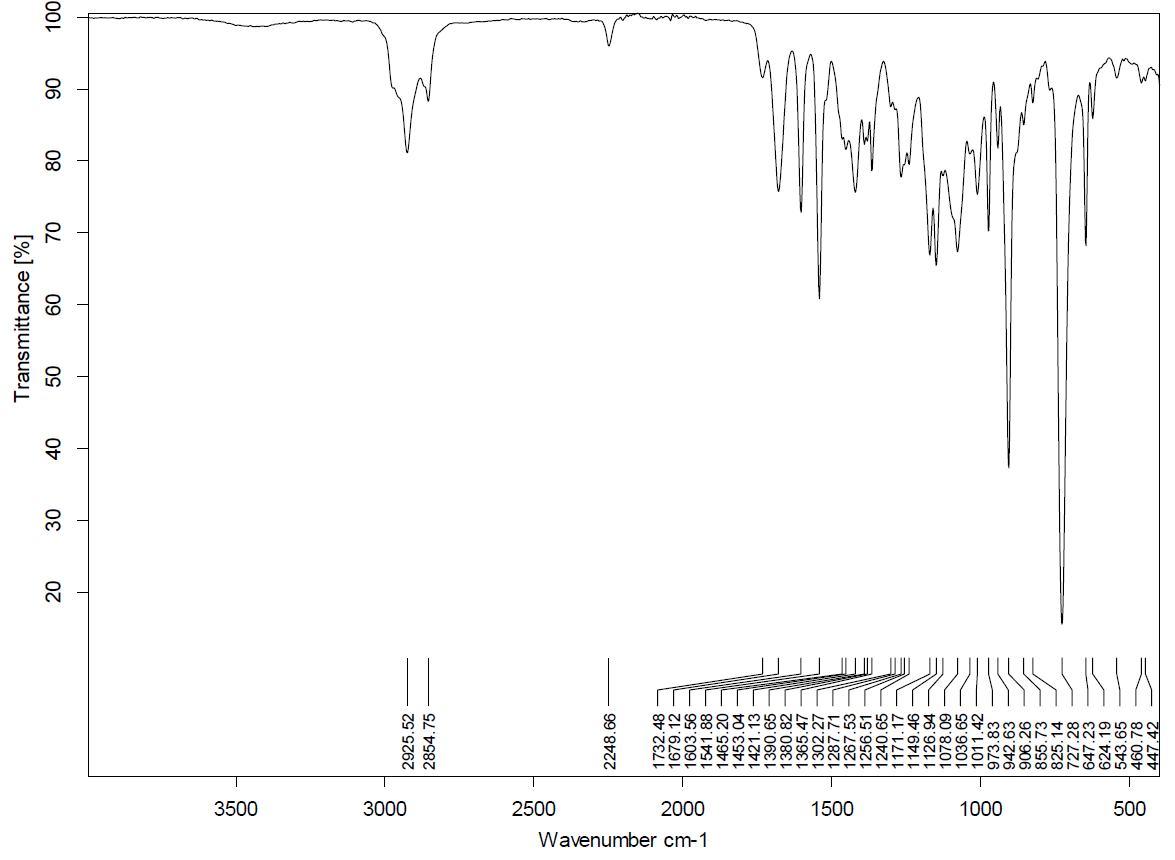


1H NMR (300MHz) spectrum of compound **7** in CDCl3

## 13C NMR (126 MHz) spectrum of compound 7 in CDCl3

##

## 19F NMR (282 MHz) spectrum of compound 7 in CDCl3

1H NMR (300MHz) spectrum of compound **8** in CDCl3

##

## 13C NMR (126 MHz) spectrum of compound 8 in CDCl3

##

## 19F NMR (282 MHz) spectrum of compound 8 in CDCl3

##

1H NMR (300MHz) spectrum of compound **9** in CDCl3

## 13C NMR (126 MHz) spectrum of compound 9 in CDCl3

##

## 19F NMR (282 MHz) spectrum of compound 9 in CDCl3

1H NMR (300MHz) spectrum of compound **10** in CDCl3


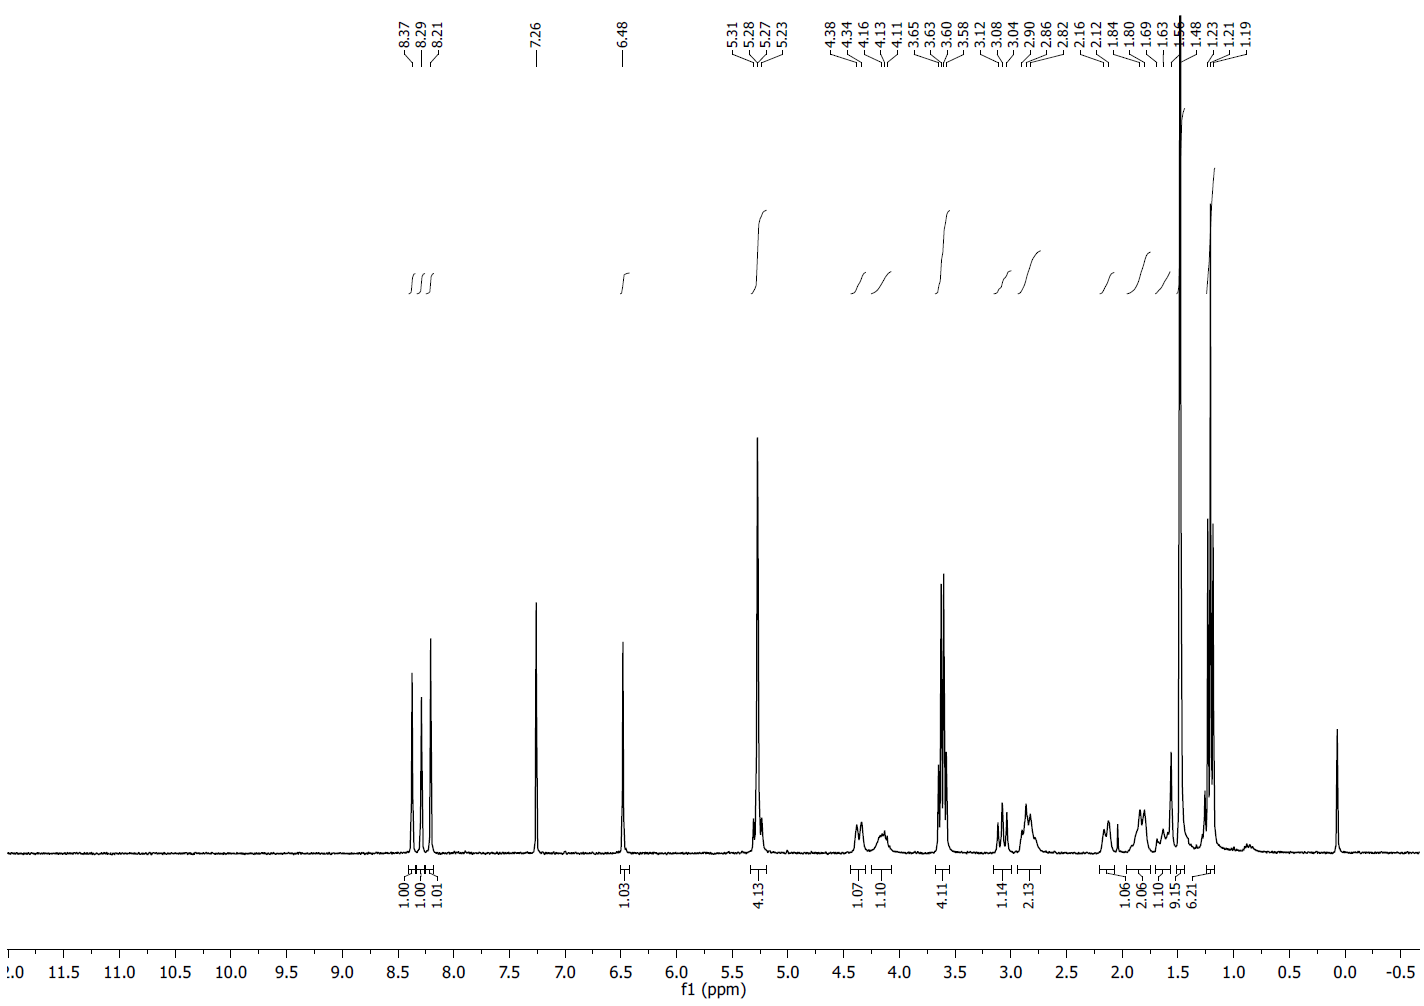

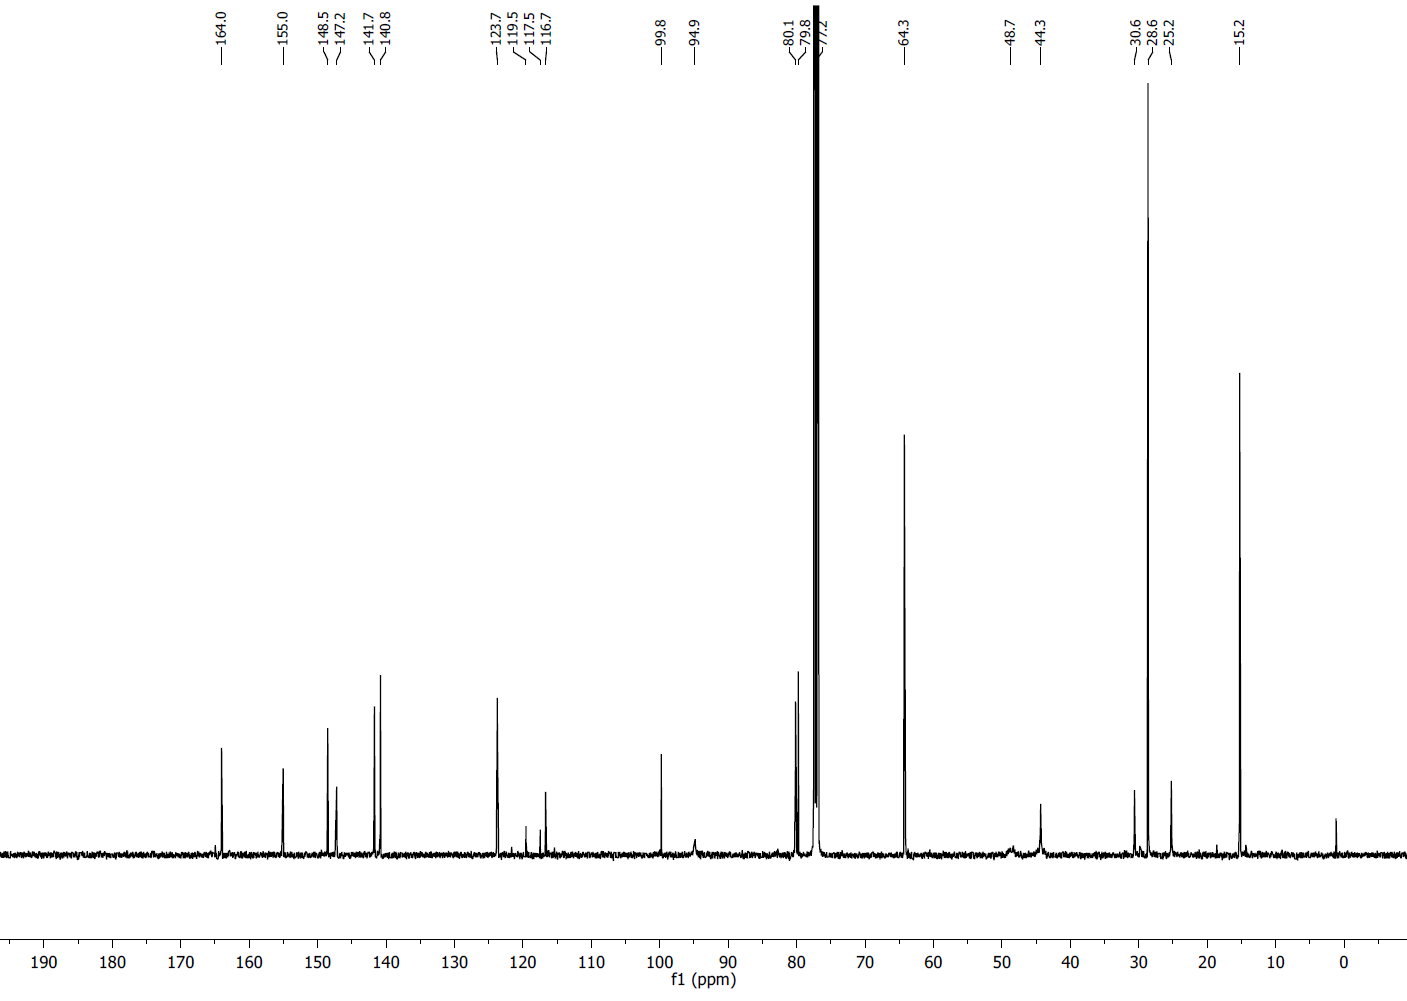


13C NMR (126 MHz) spectrum of compound **10** in CDCl3

19F NMR (282MHz) spectrum of compound **10** in CDCl3


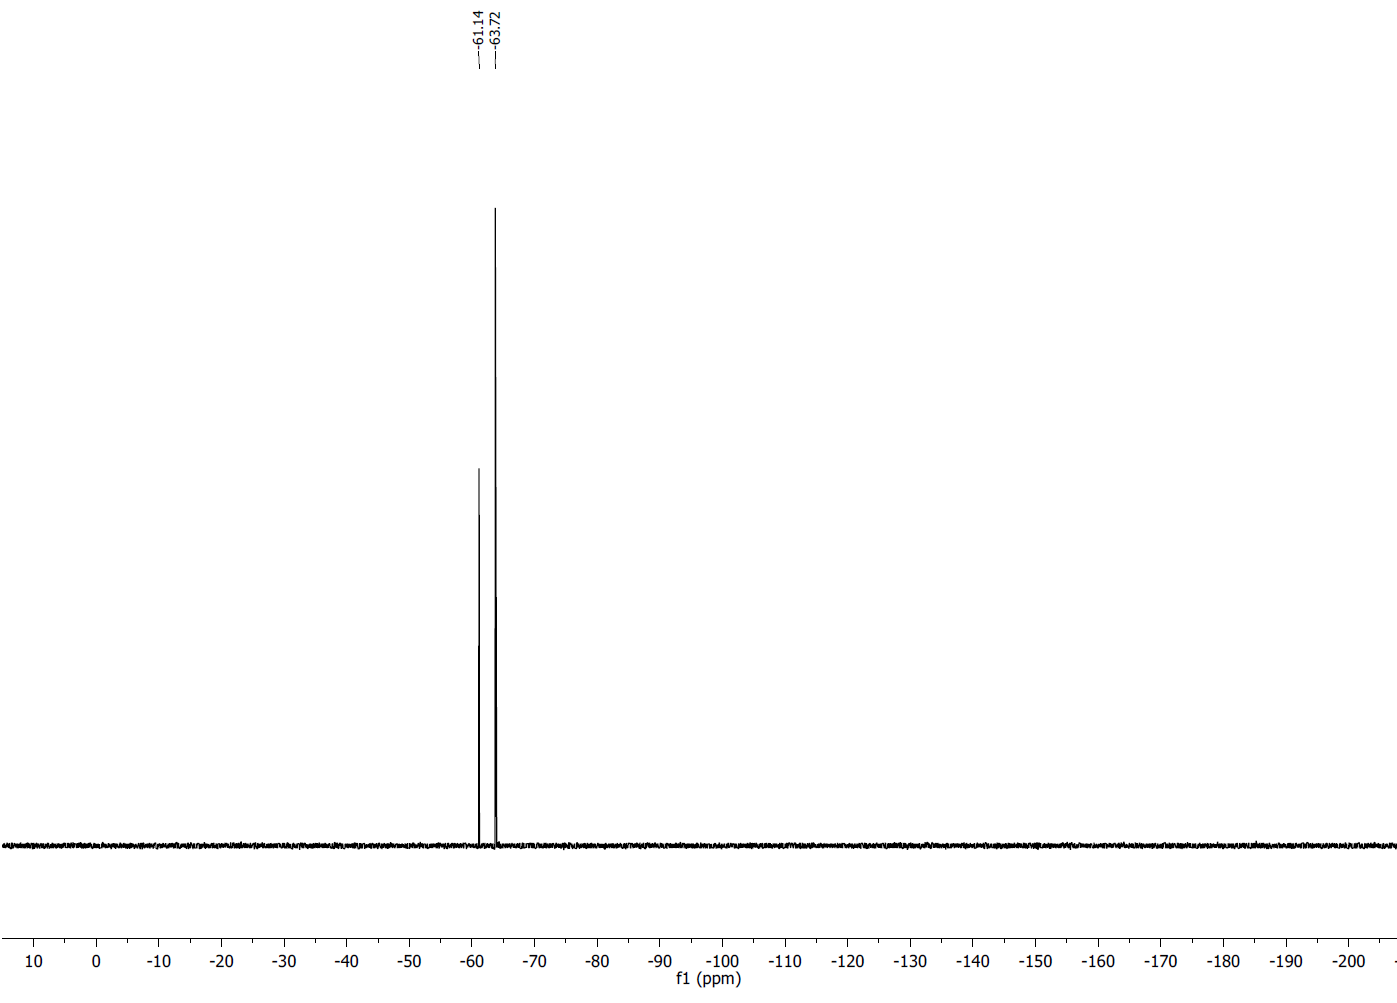


HRMS of compound **7**


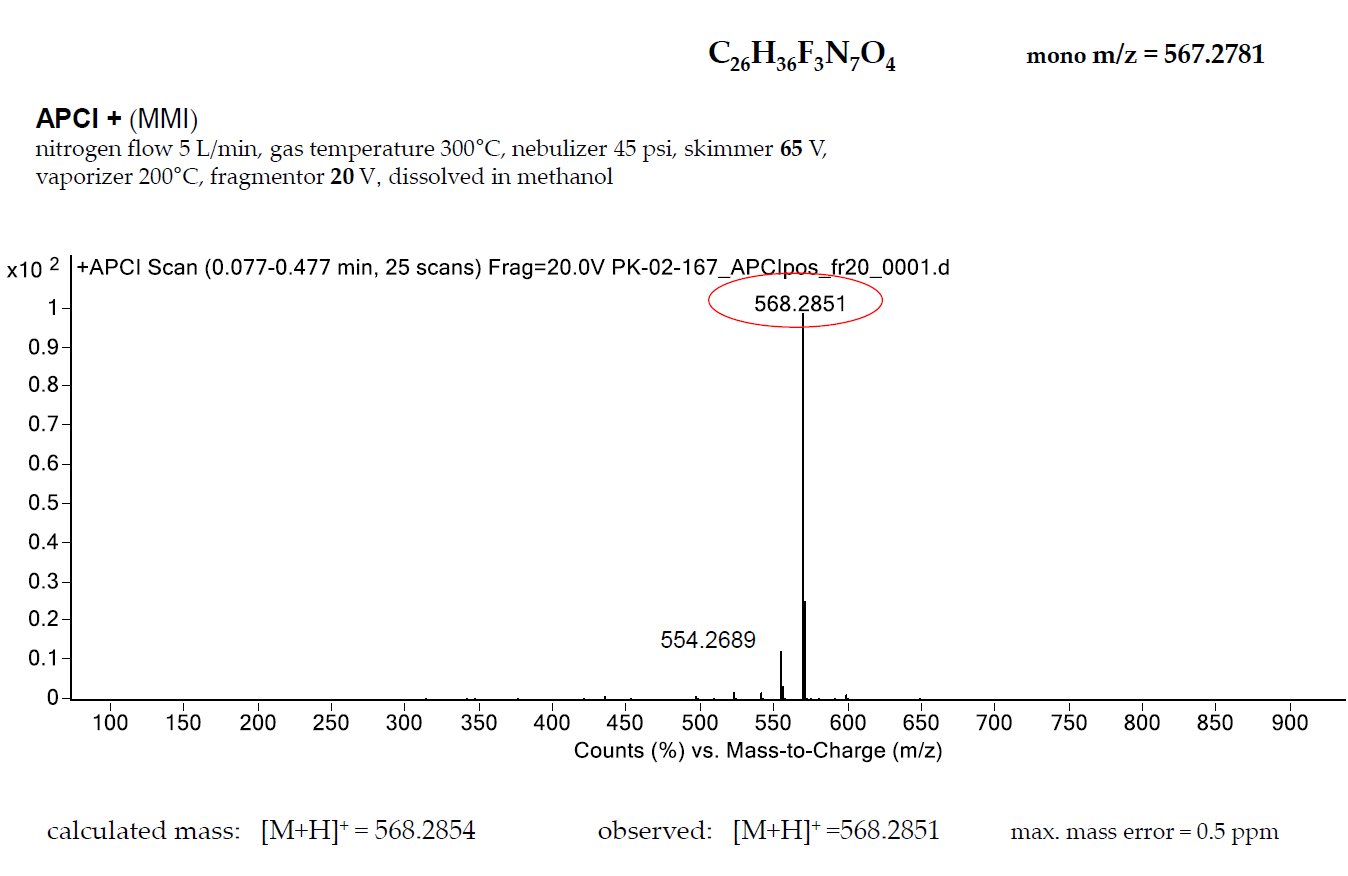


IR spectrum of compound **10**


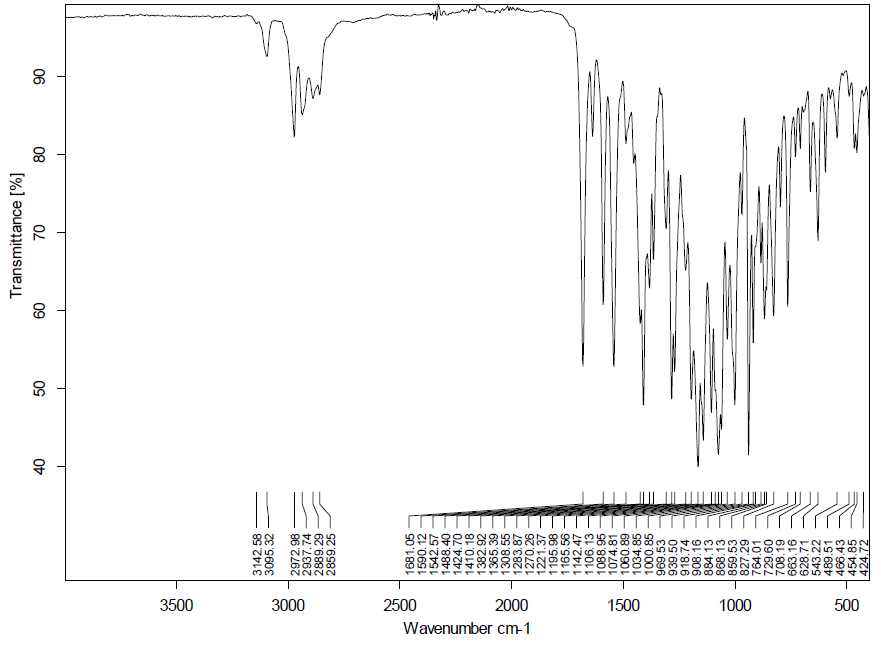


1H NMR (500MHz) spectrum of compound **11** in DMSO-*d6*


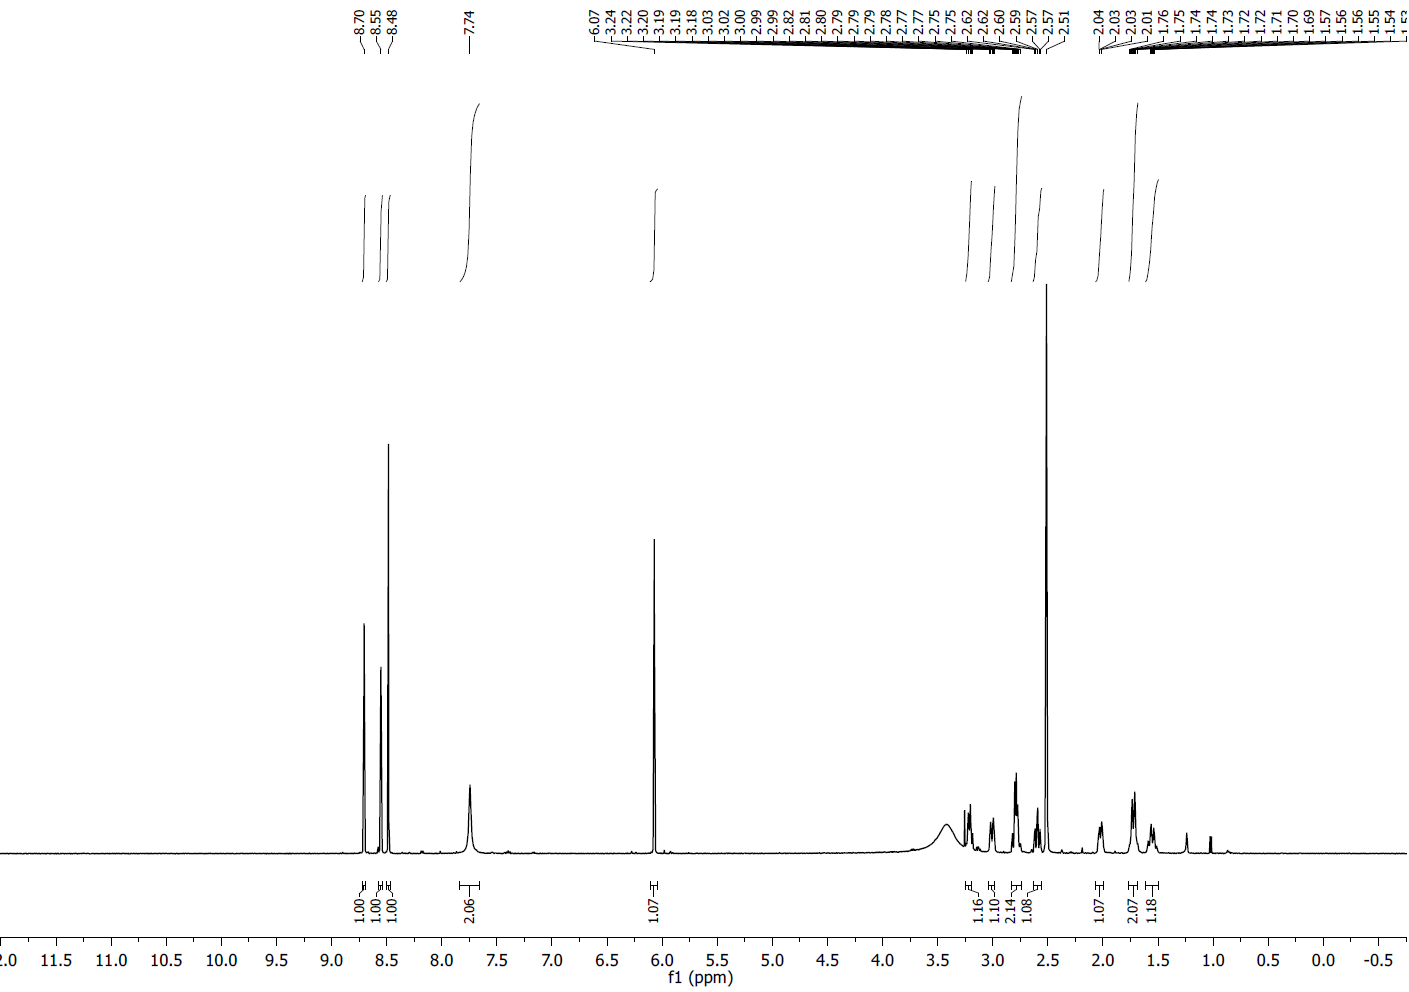

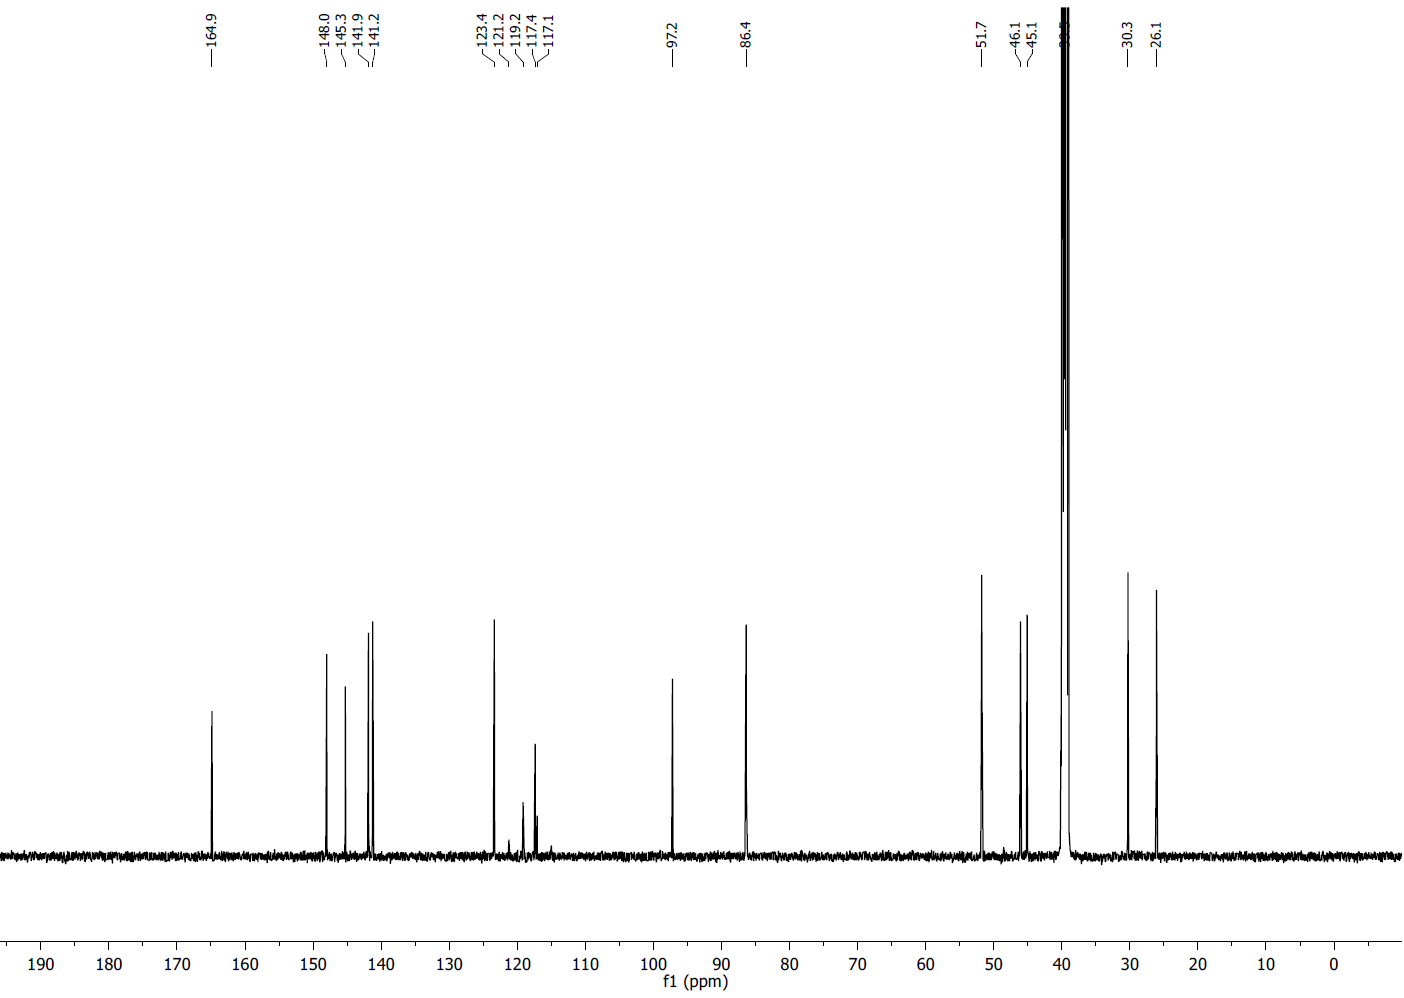


13C NMR (126 MHz) spectrum of compound **11** in DMSO-*d6*

19F NMR (282MHz) spectrum of compound **11** in DMSO-*d6*


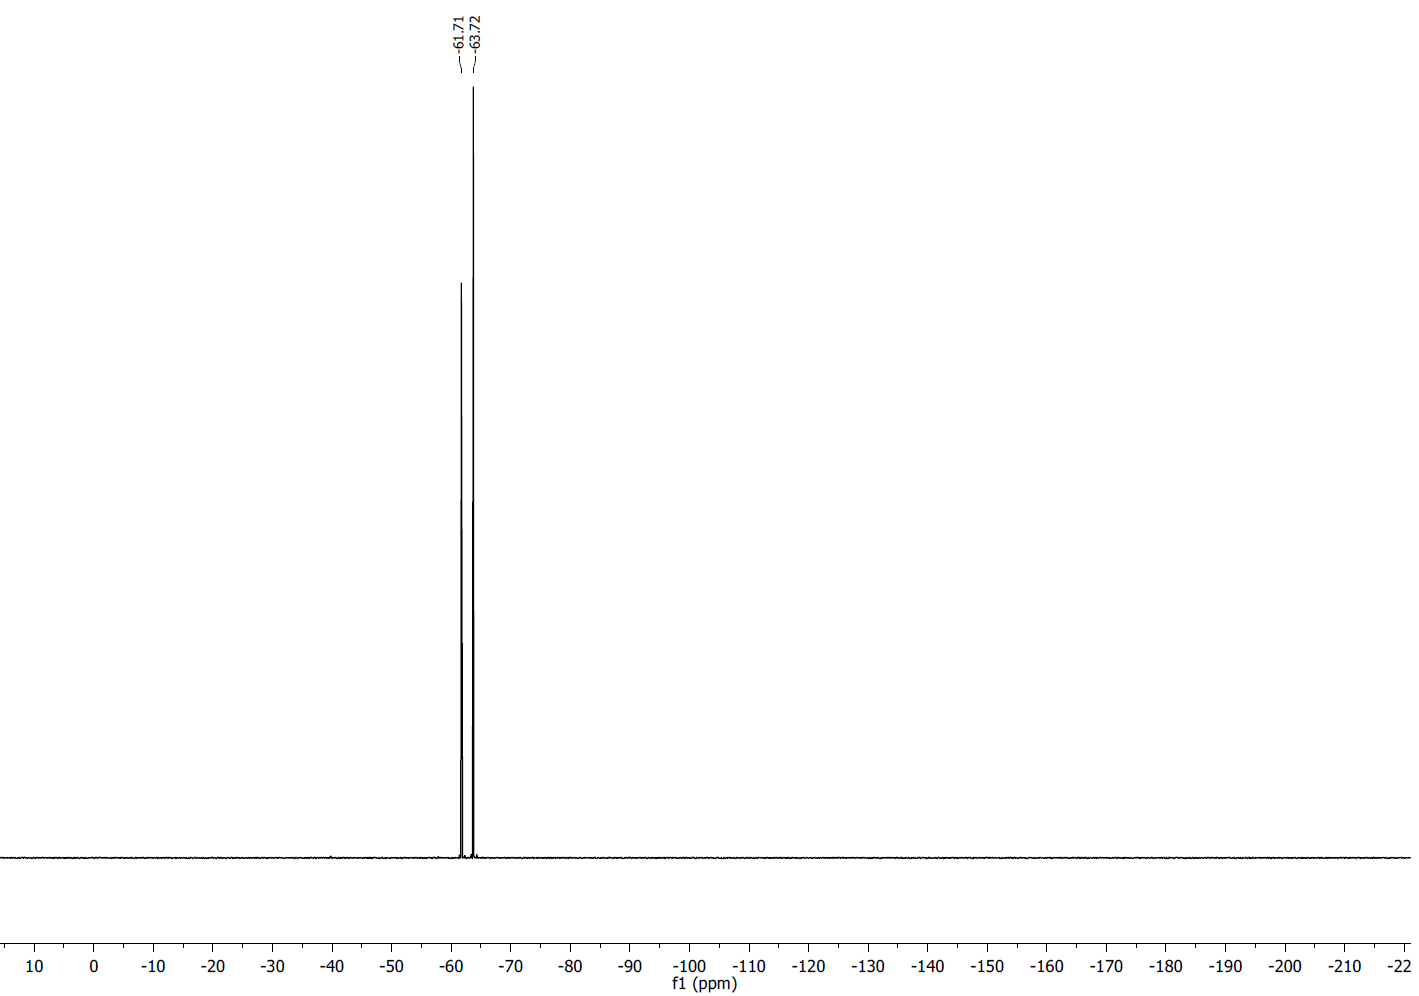


HRMS of compound **11**


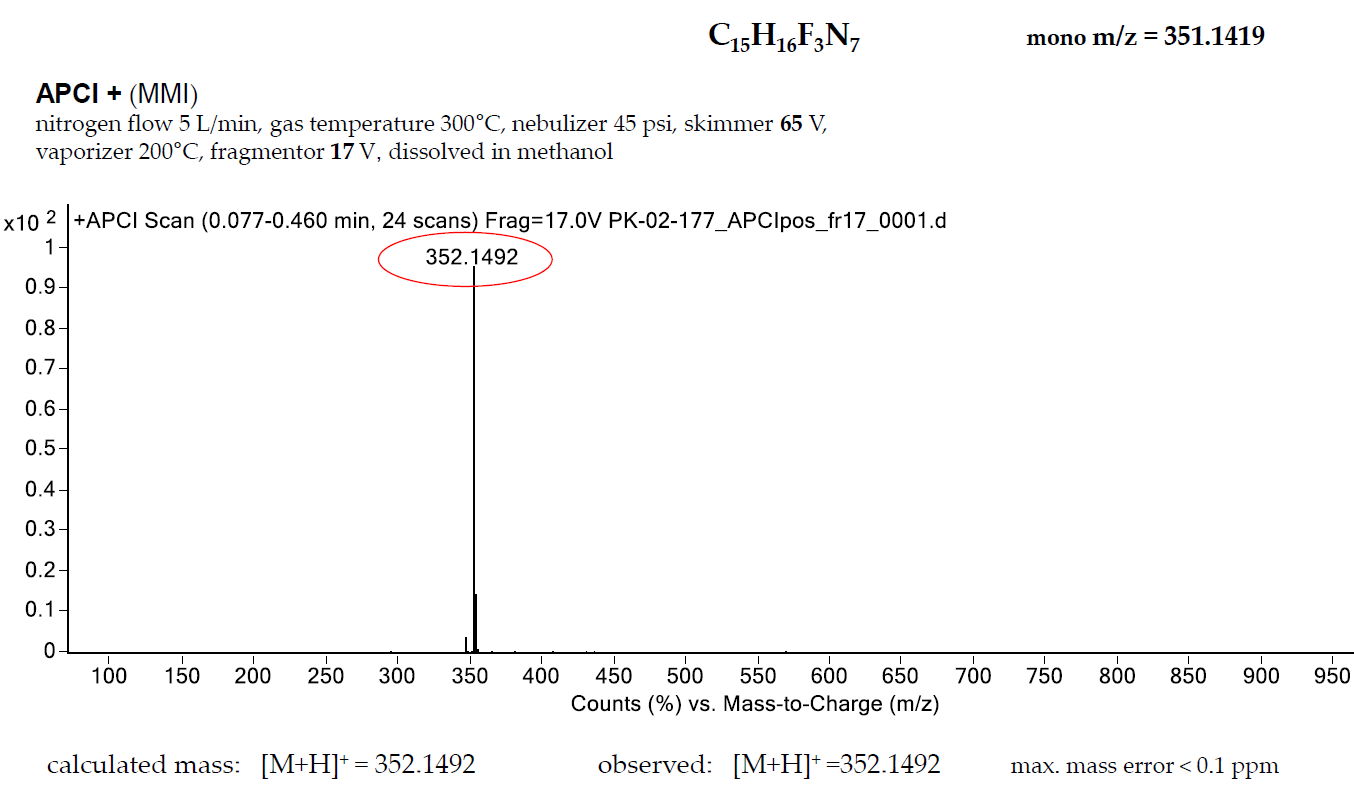


IR spectrum of compound **11**


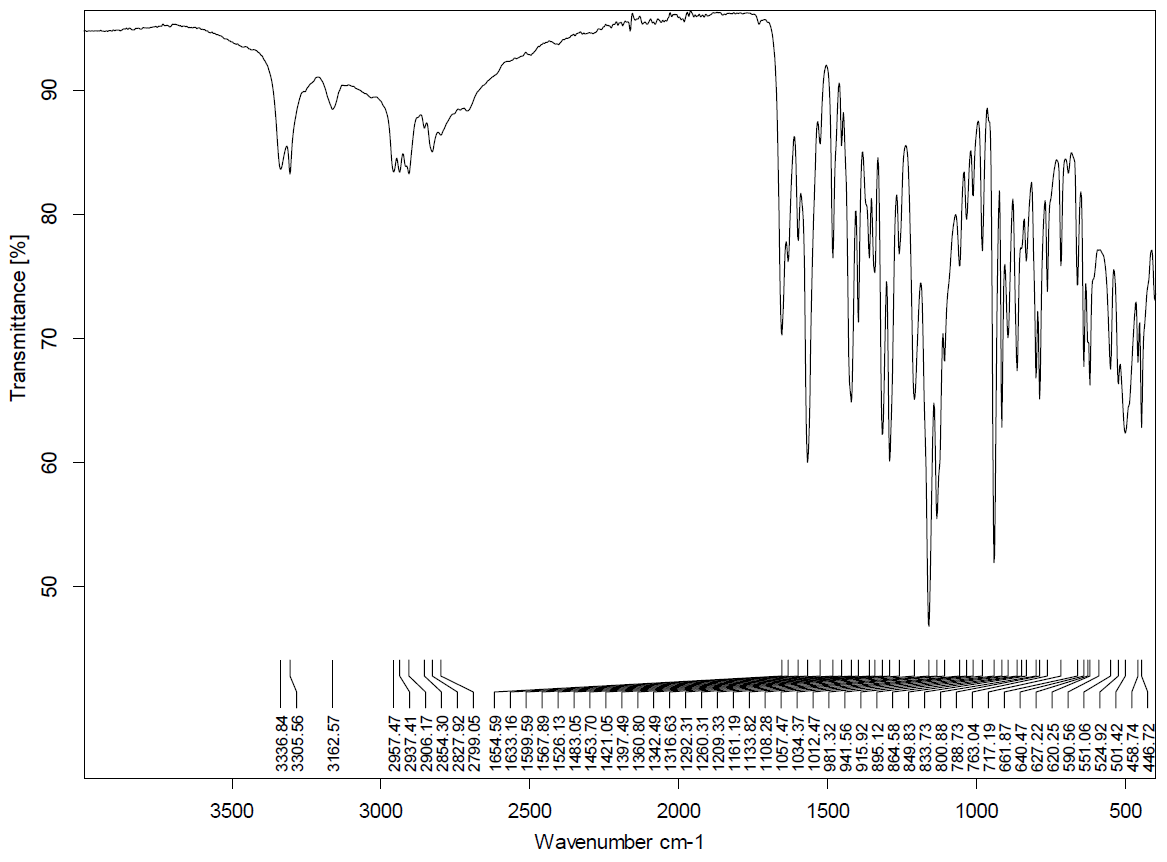


**Separation of enantiomers of racemic compound 11:**

Column : Chiralpak-AD semi preparative

Injection Volume : 2 mL

Flow Rate : 9 mL/min

Mobile Phase : n-hexane/IPA 90 : 10 + 0.1 % DEA

Conc. of sample : 20 mg of compound **11** in 2 mL IPA

Retention time : Enantiomer - A (43.76 minute) + Enantiomer - B (58.60 minute)

Enantiomer – B (slow eluting) is the required R enantiomer.

HPLC chromatogram of racemic compound **11** (semipreparative)


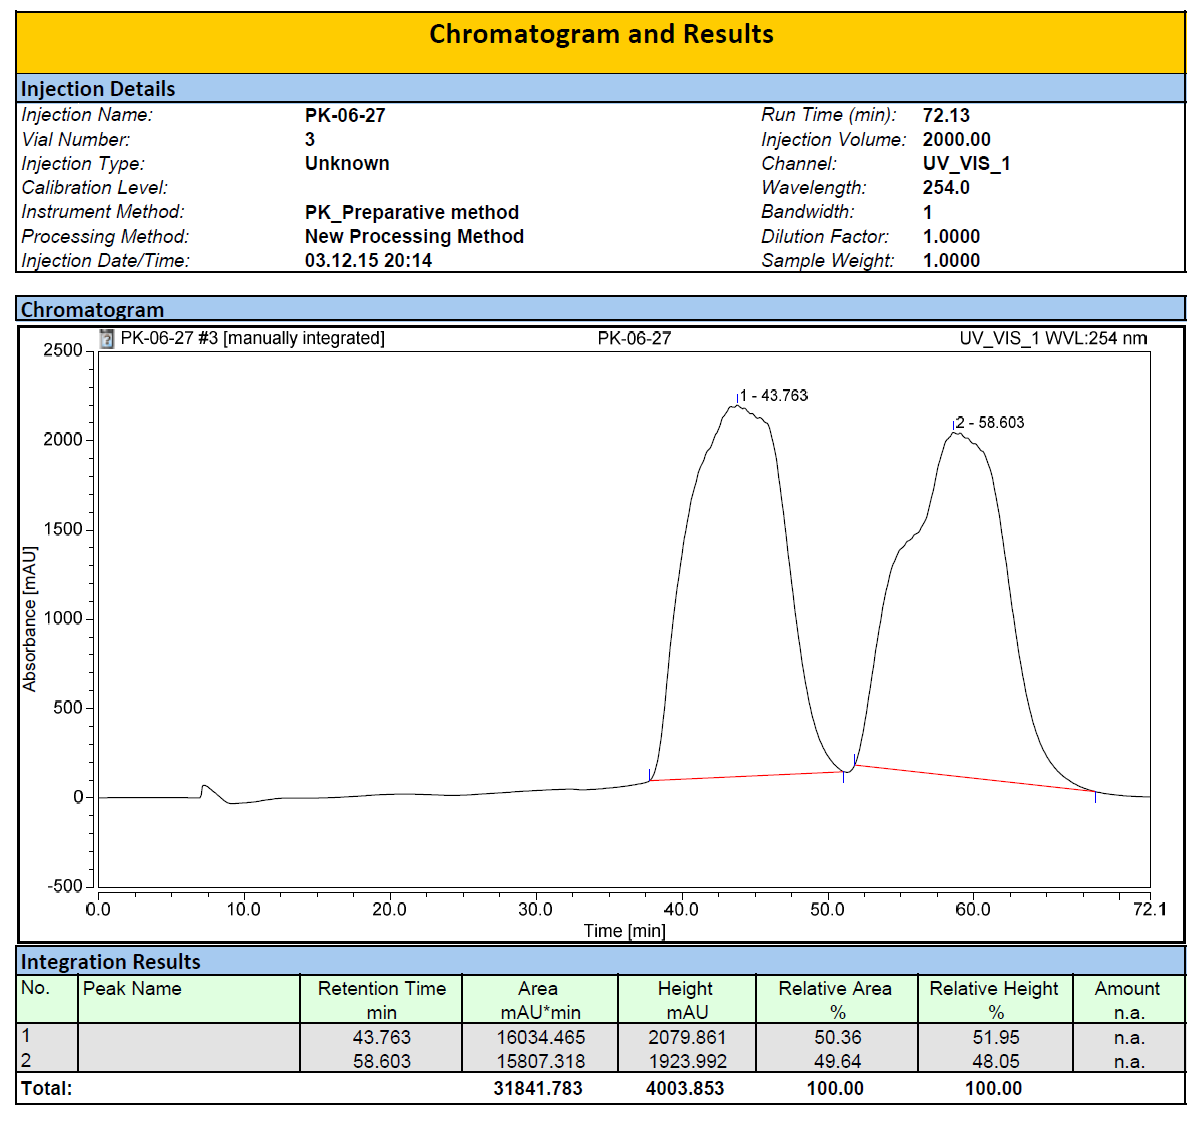

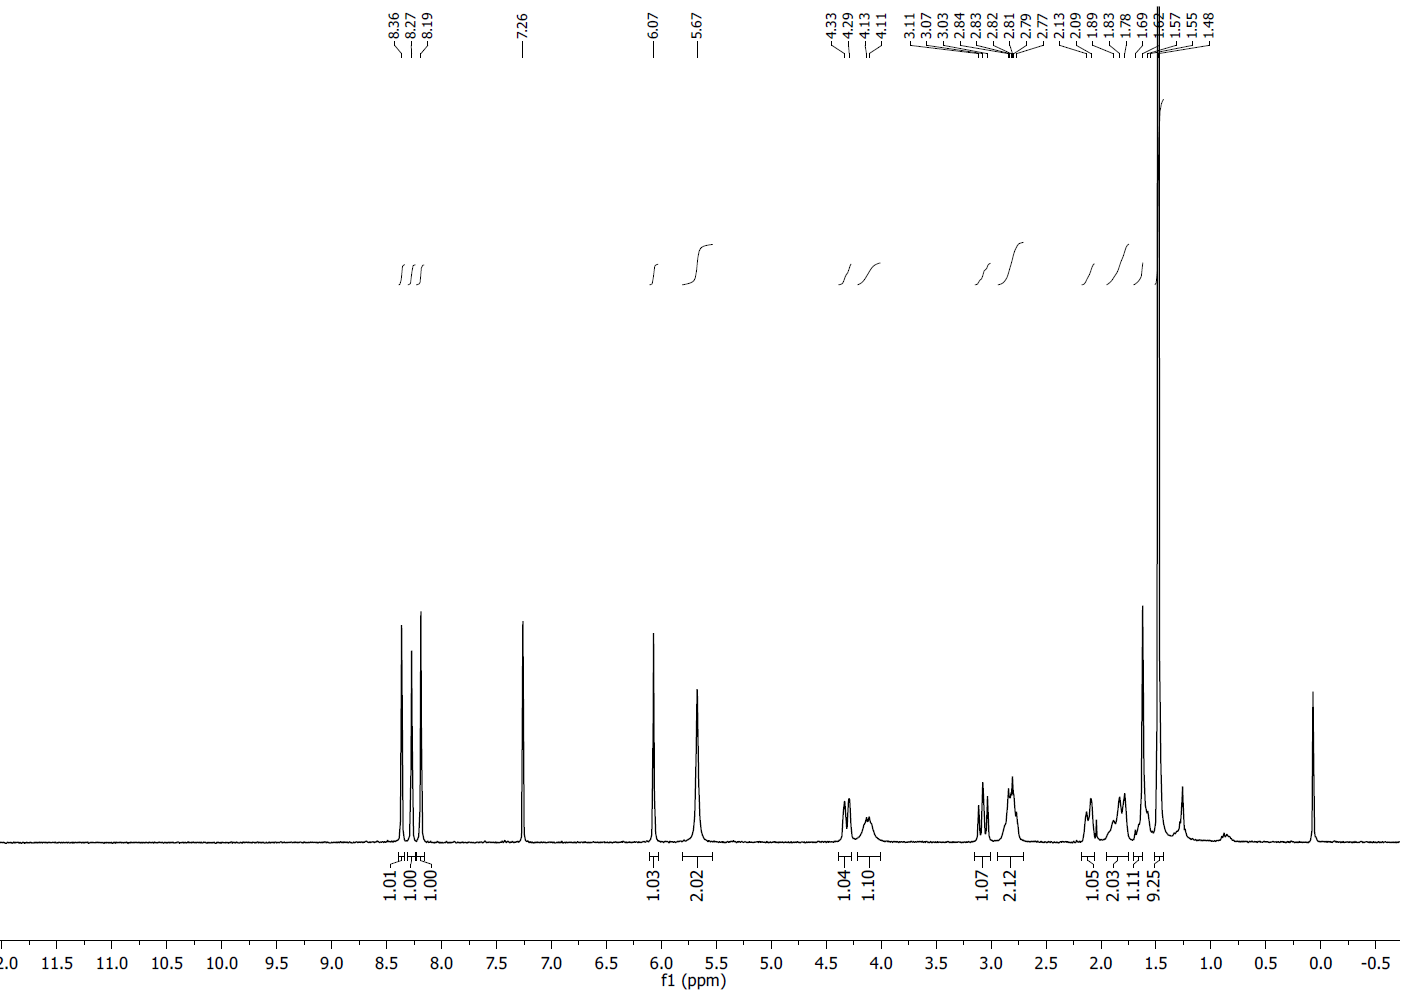


1H NMR (300MHz) spectrum of compound **12** in CDCl3

13C NMR (126 MHz) spectrum of compound **12** in CDCl3


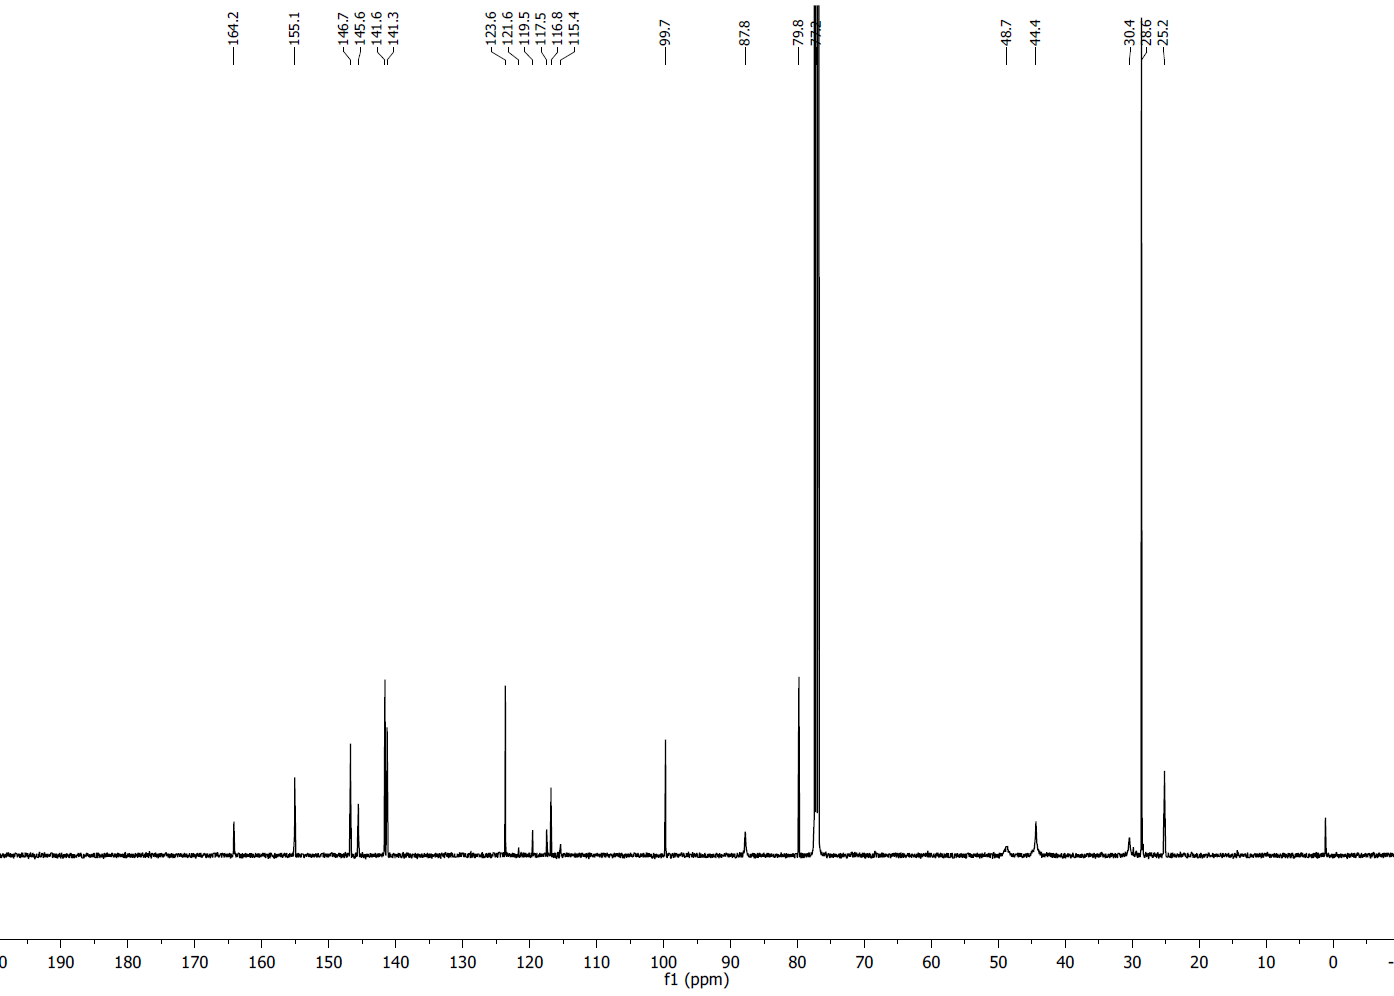


19F NMR (282MHz) spectrum of compound **12** in CDCl3


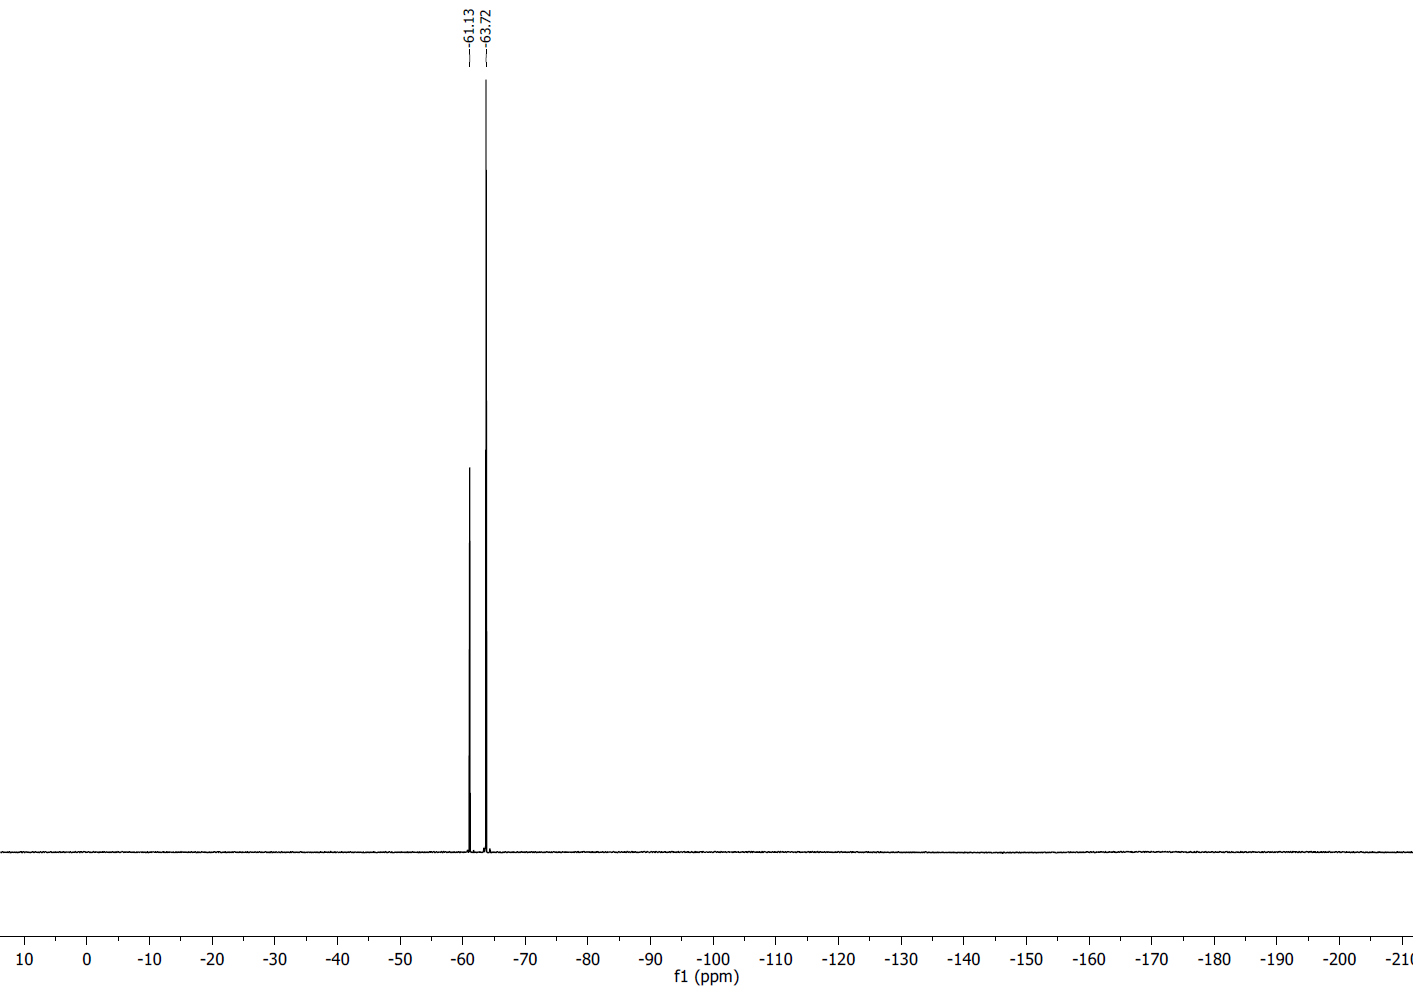


HRMS of compound **12**


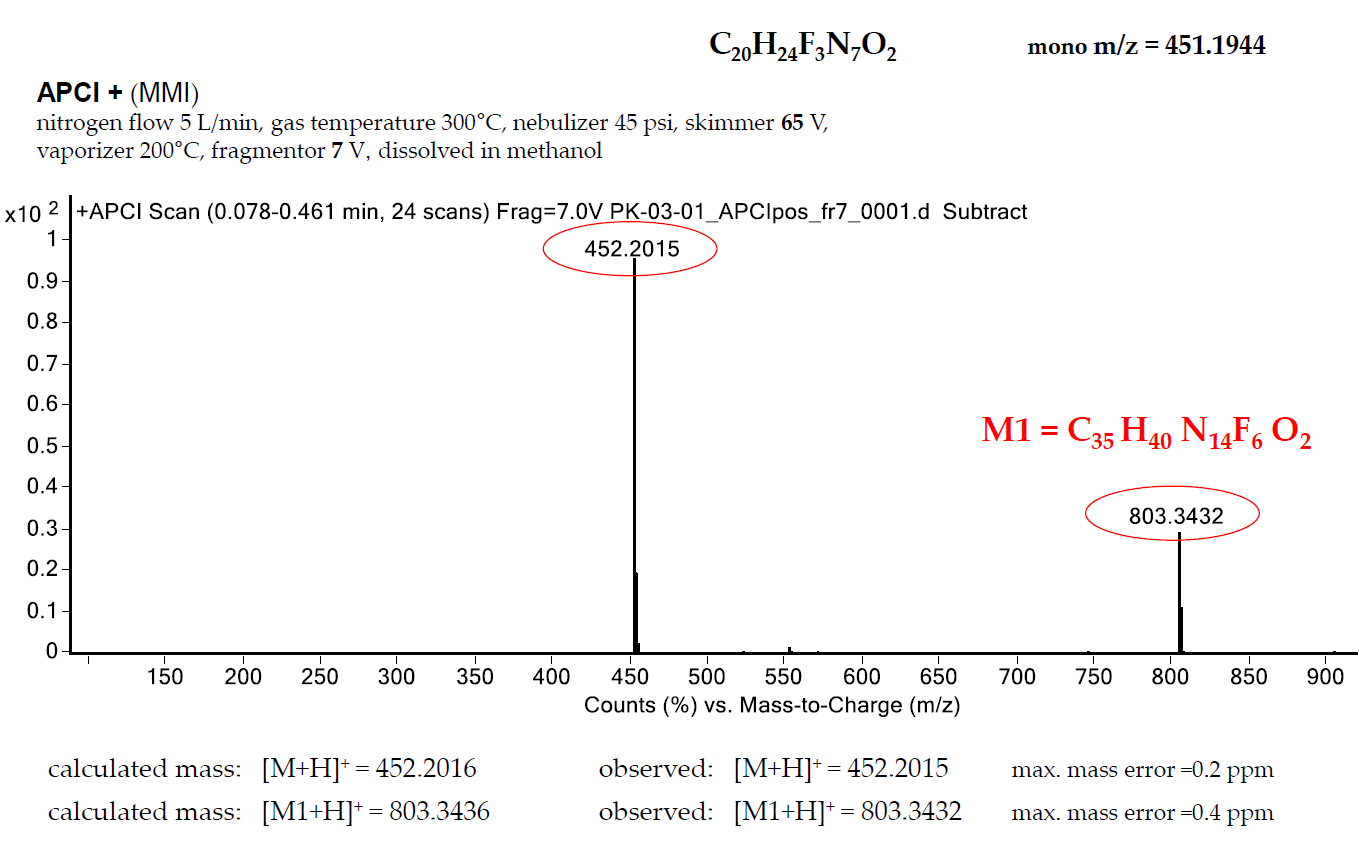


IR spectrum of compound **12**


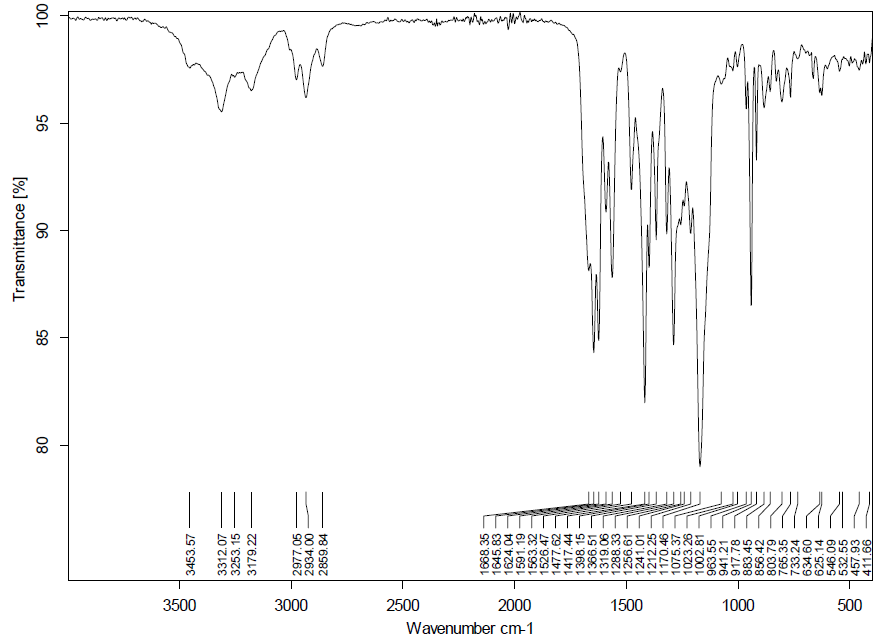

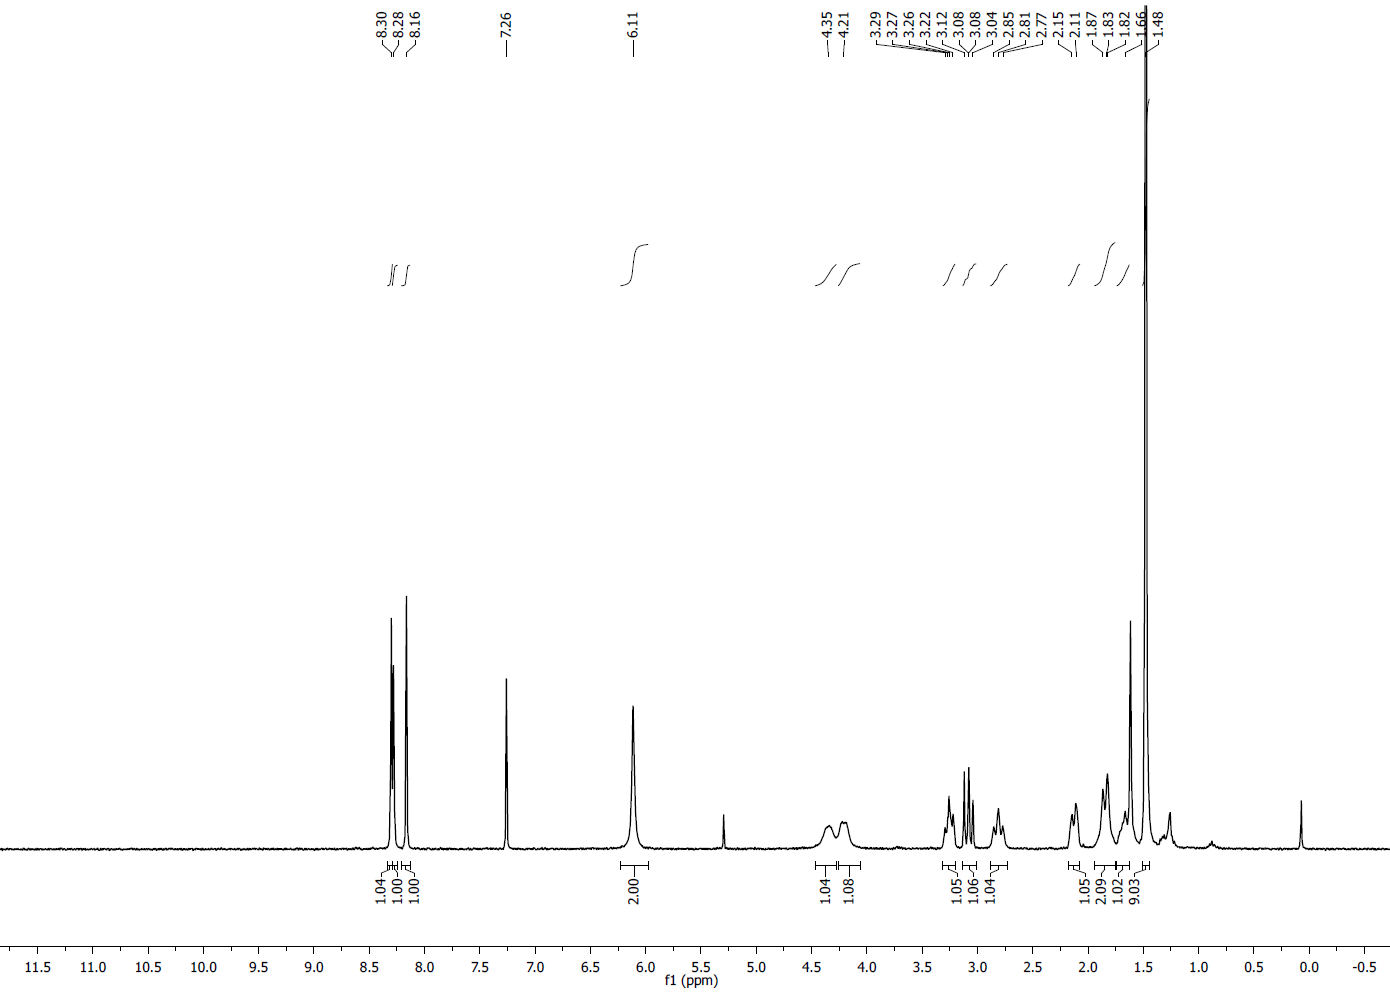


1H NMR (300MHz) spectrum of compound **13** in CDCl3


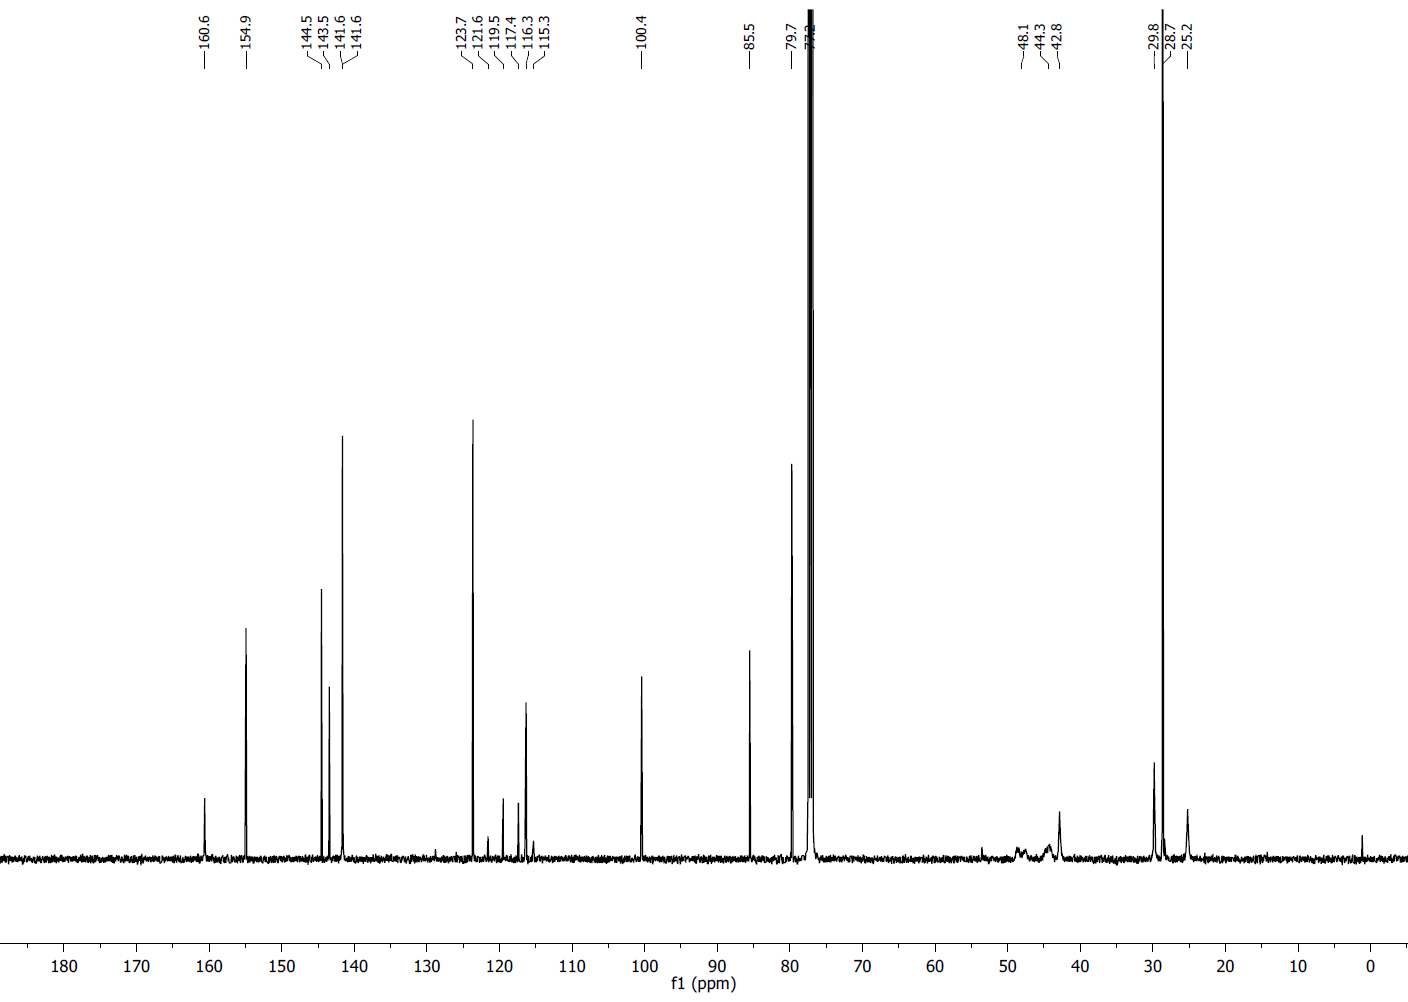


13C NMR (126 MHz) spectrum of compound **13** in CDCl3

19F NMR (282MHz) spectrum of compound **13** in CDCl3


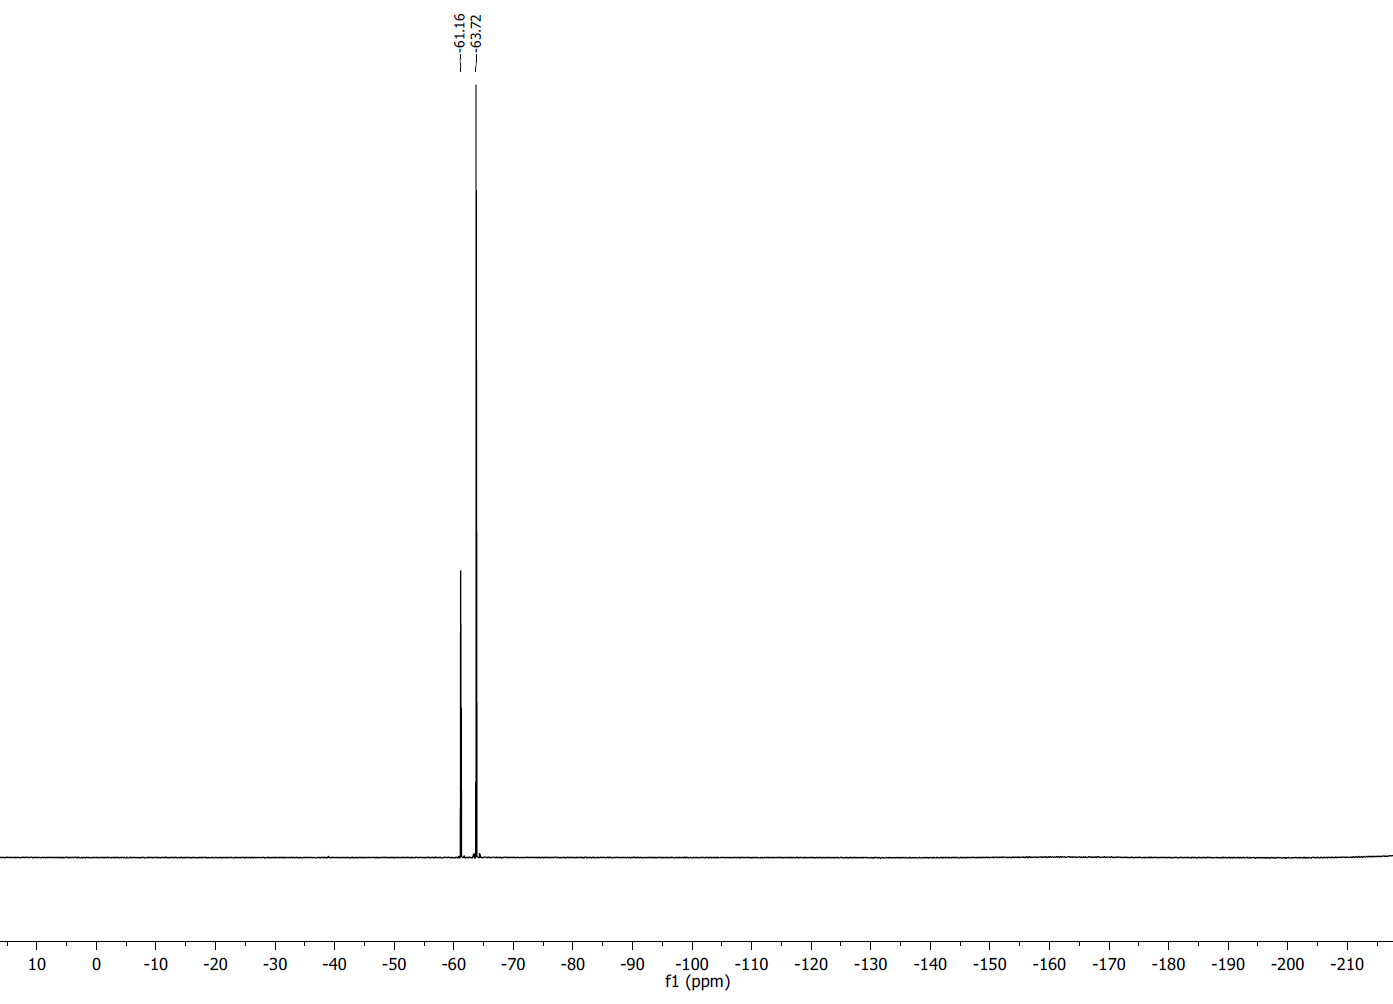


HRMS of compound **13**


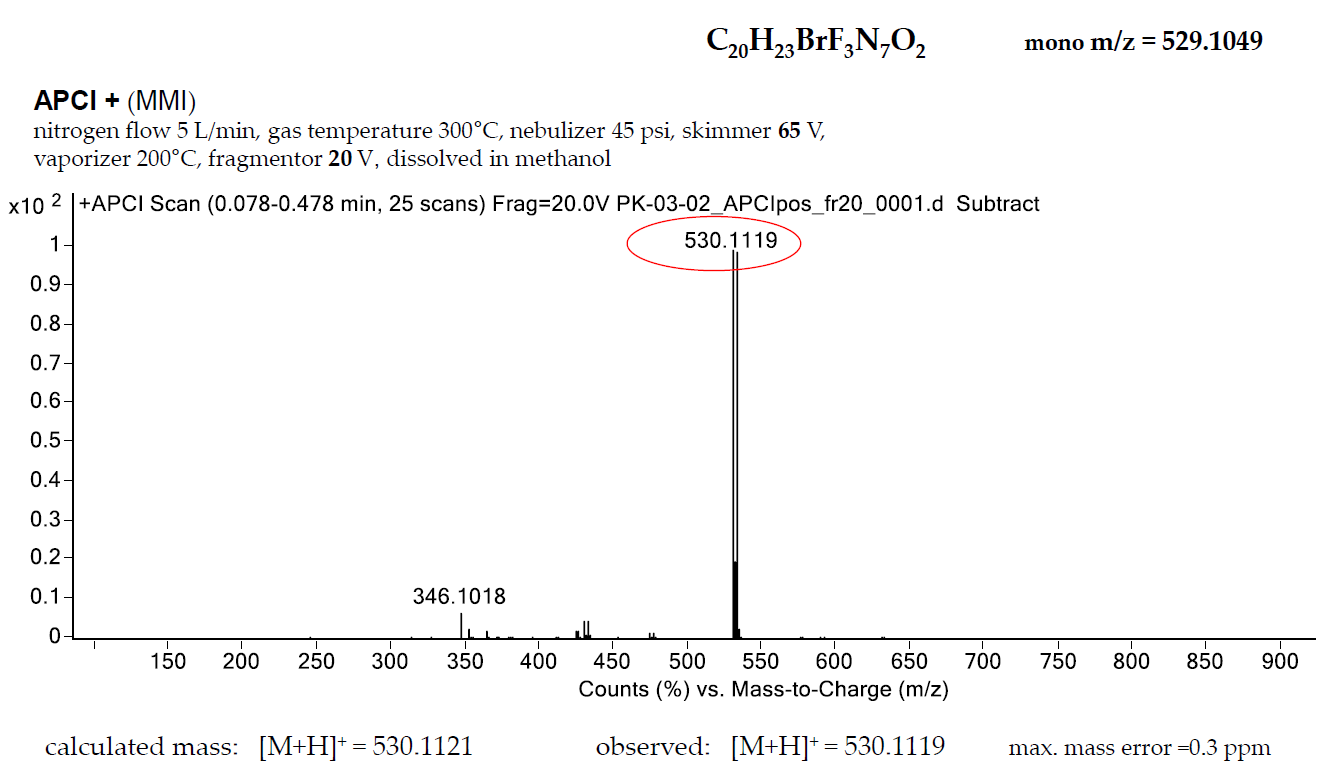


IR spectrum of compound **13**


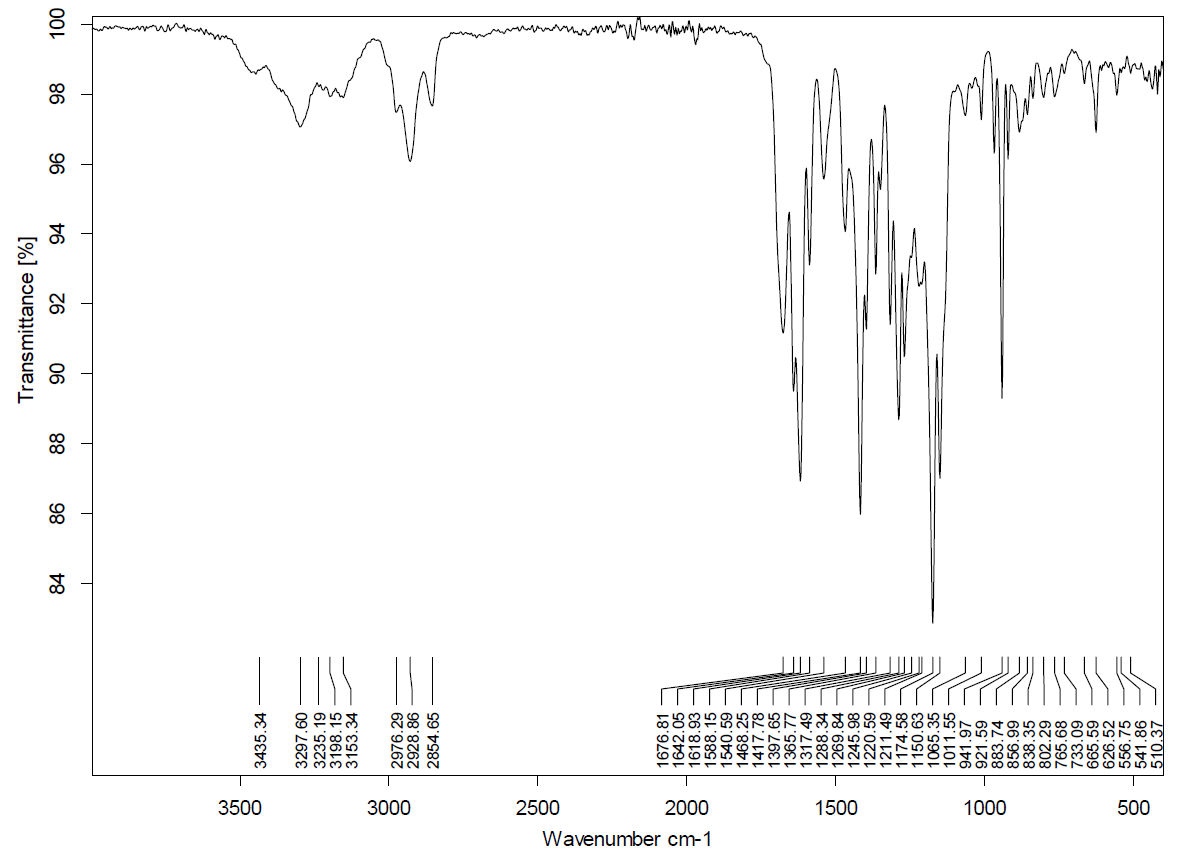


1H NMR (500MHz) spectrum of **MU380** in DMSO-*d6*


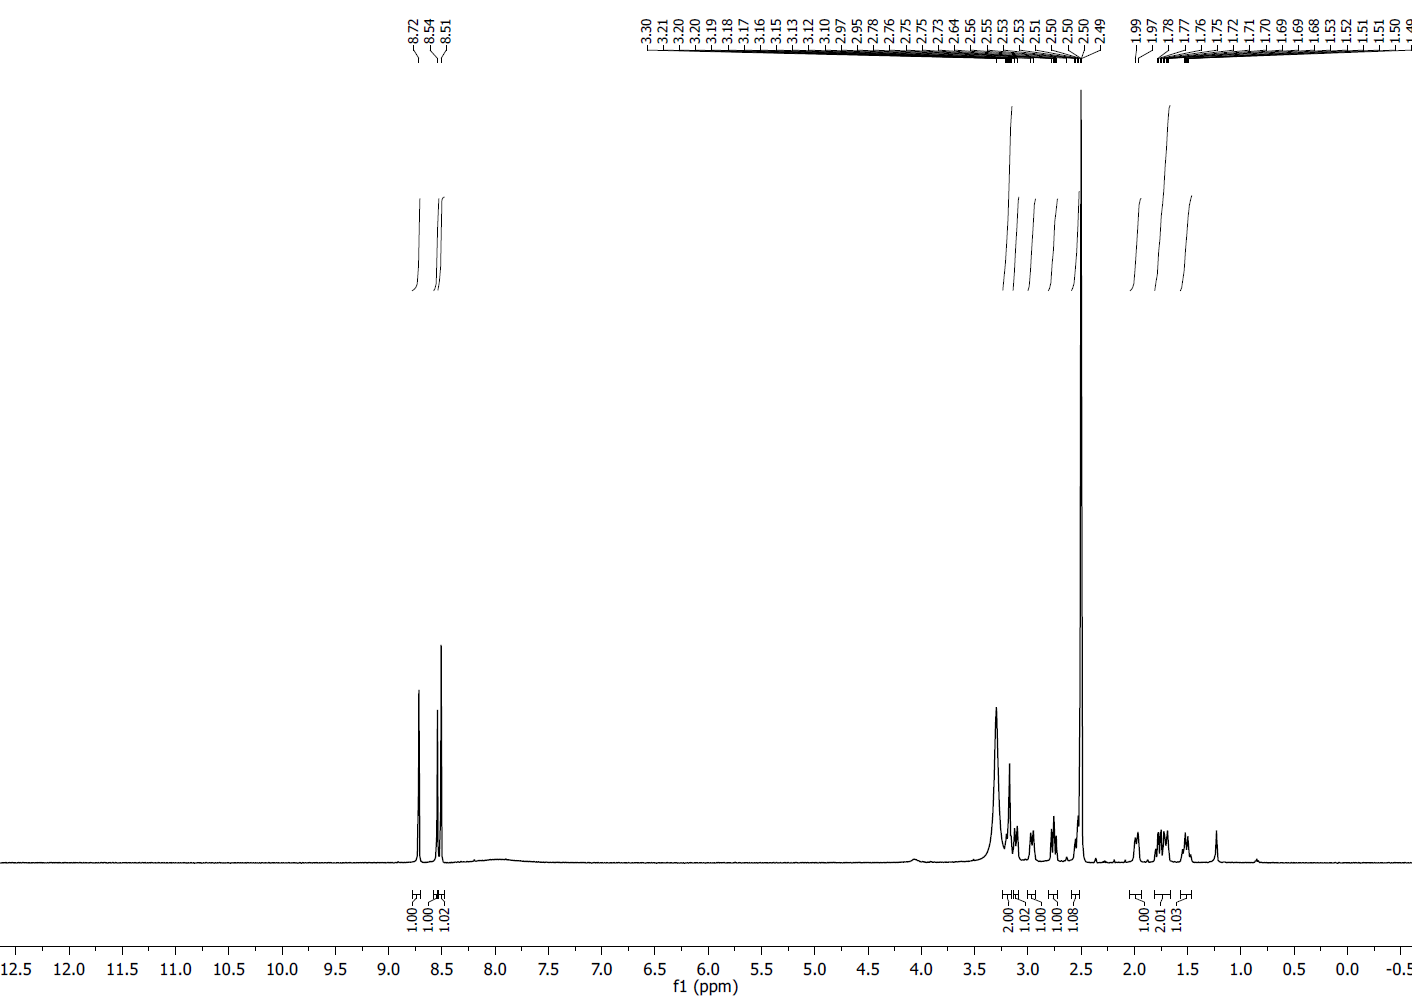

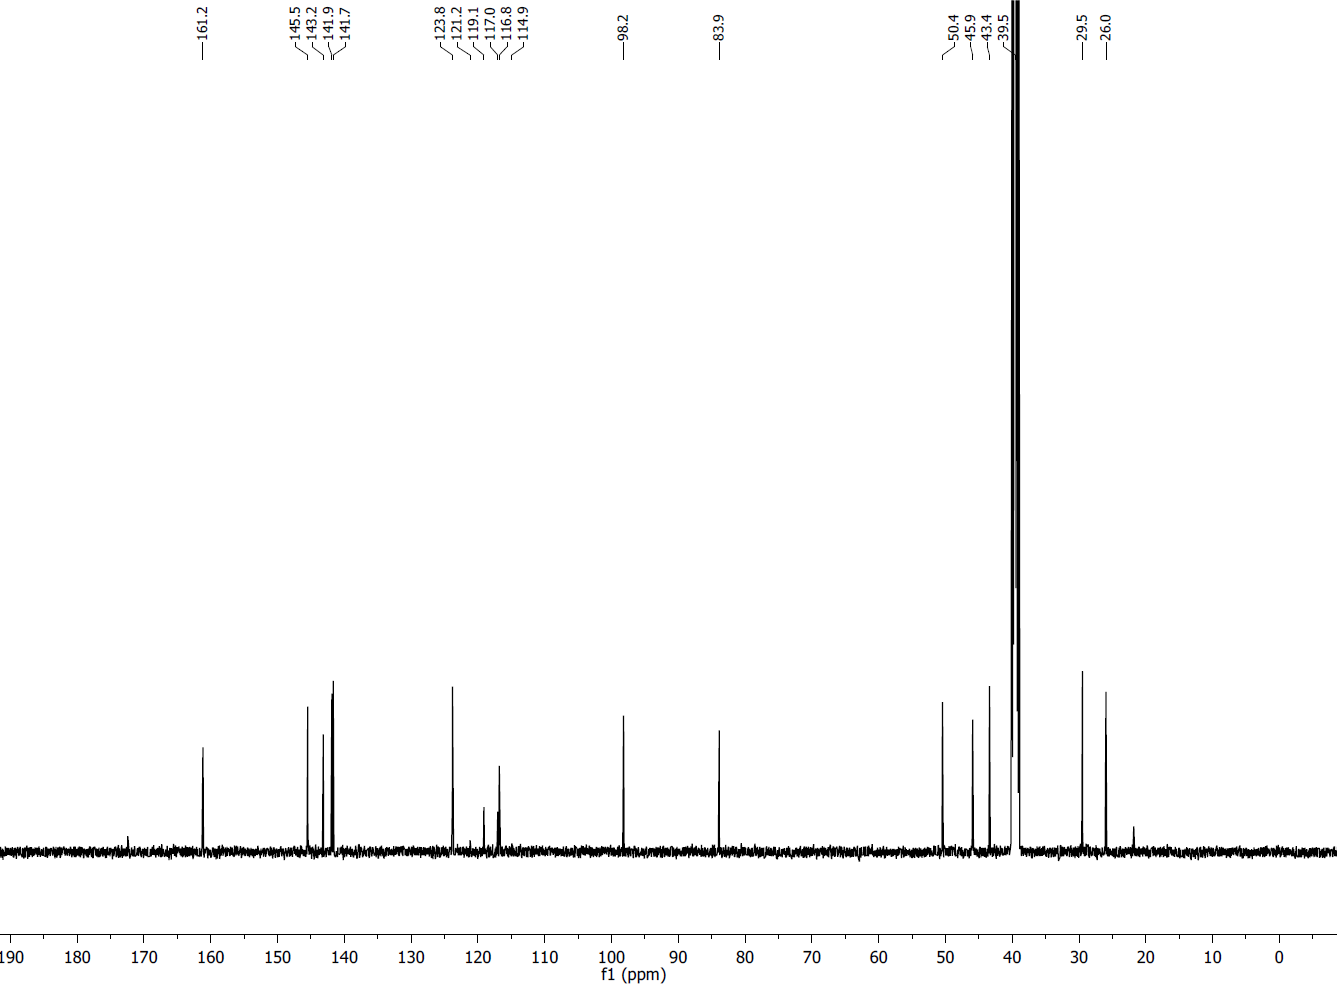


13C NMR (126 MHz) spectrum of **MU380** in DMSO-*d6*

19F NMR (282MHz) spectrum of **MU380** in DMSO-*d6*


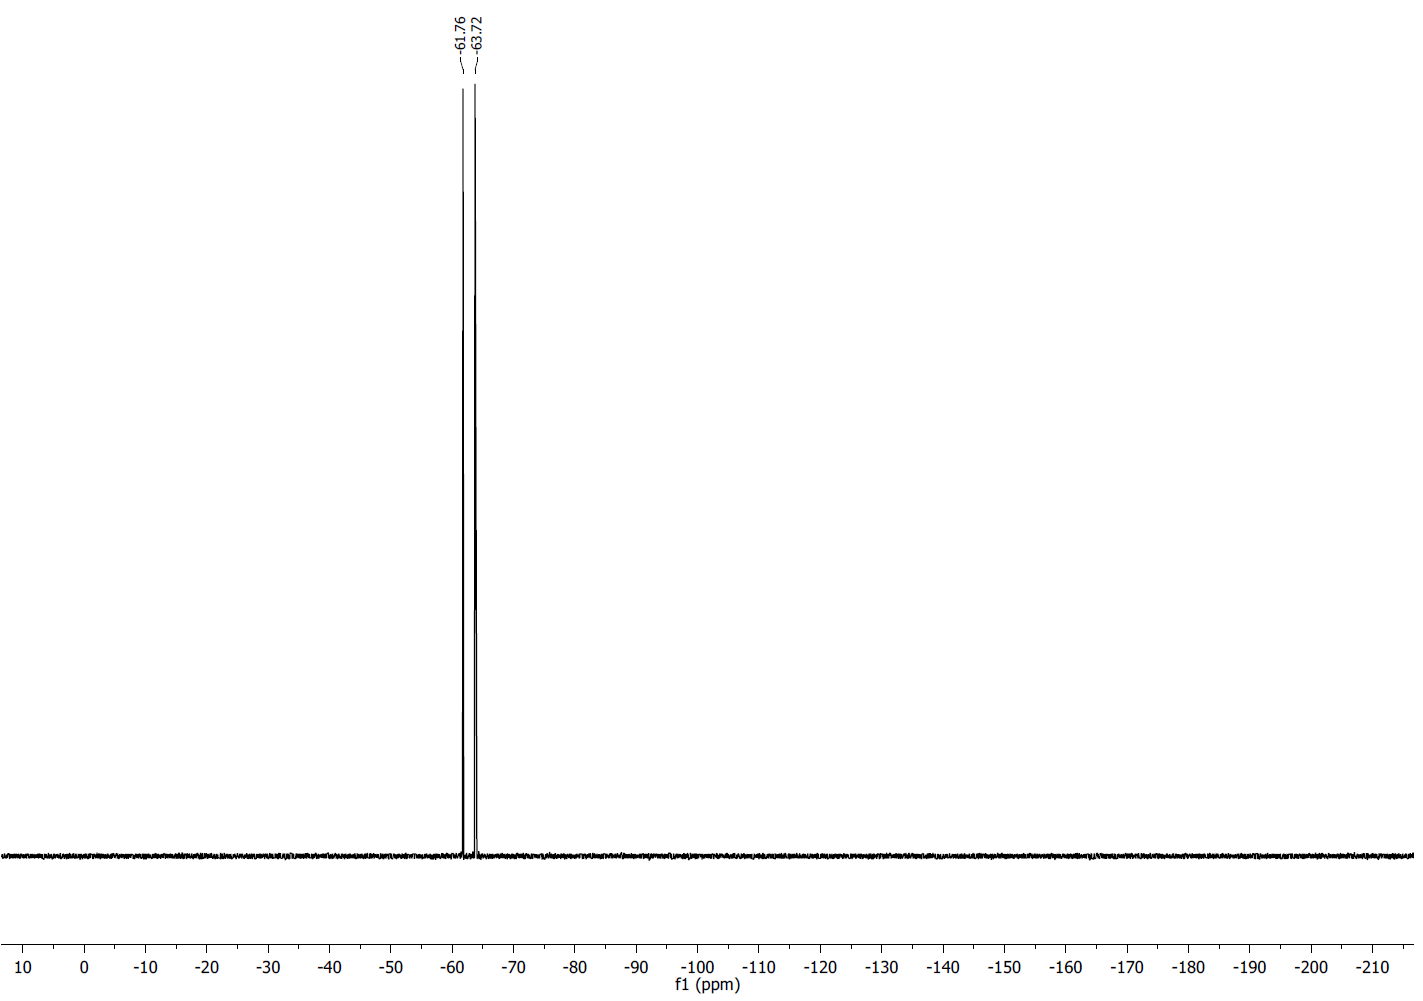


HRMS of **MU380**


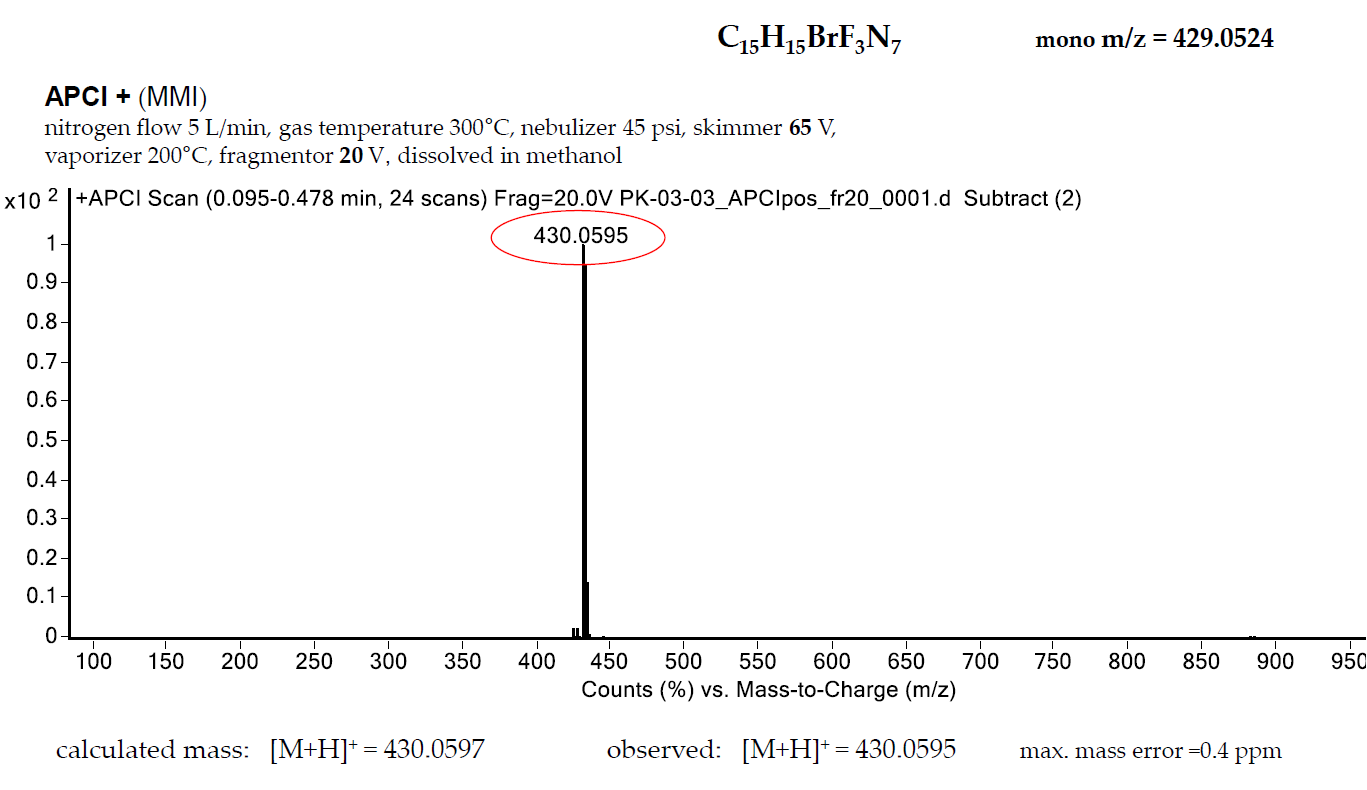


IR spectrum of **MU380**


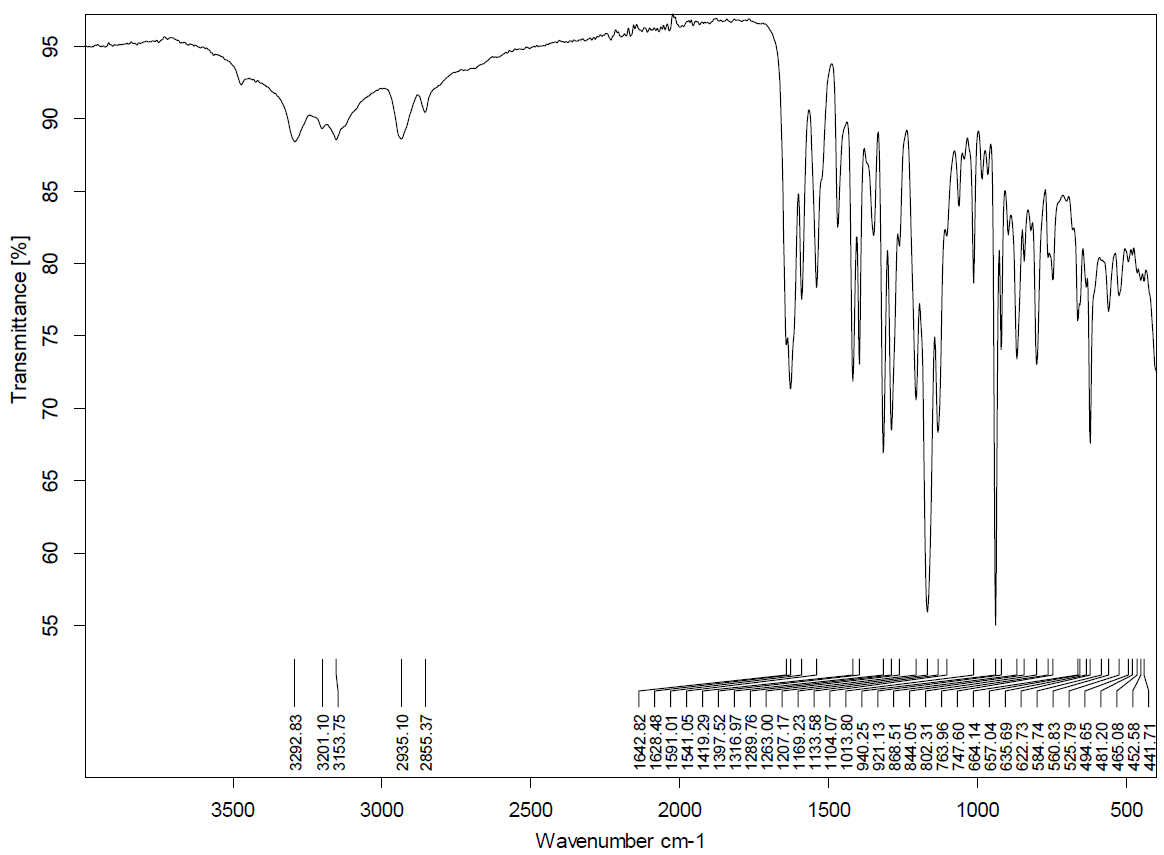


1H NMR (300MHz) spectrum of compound **14** in CDCl3


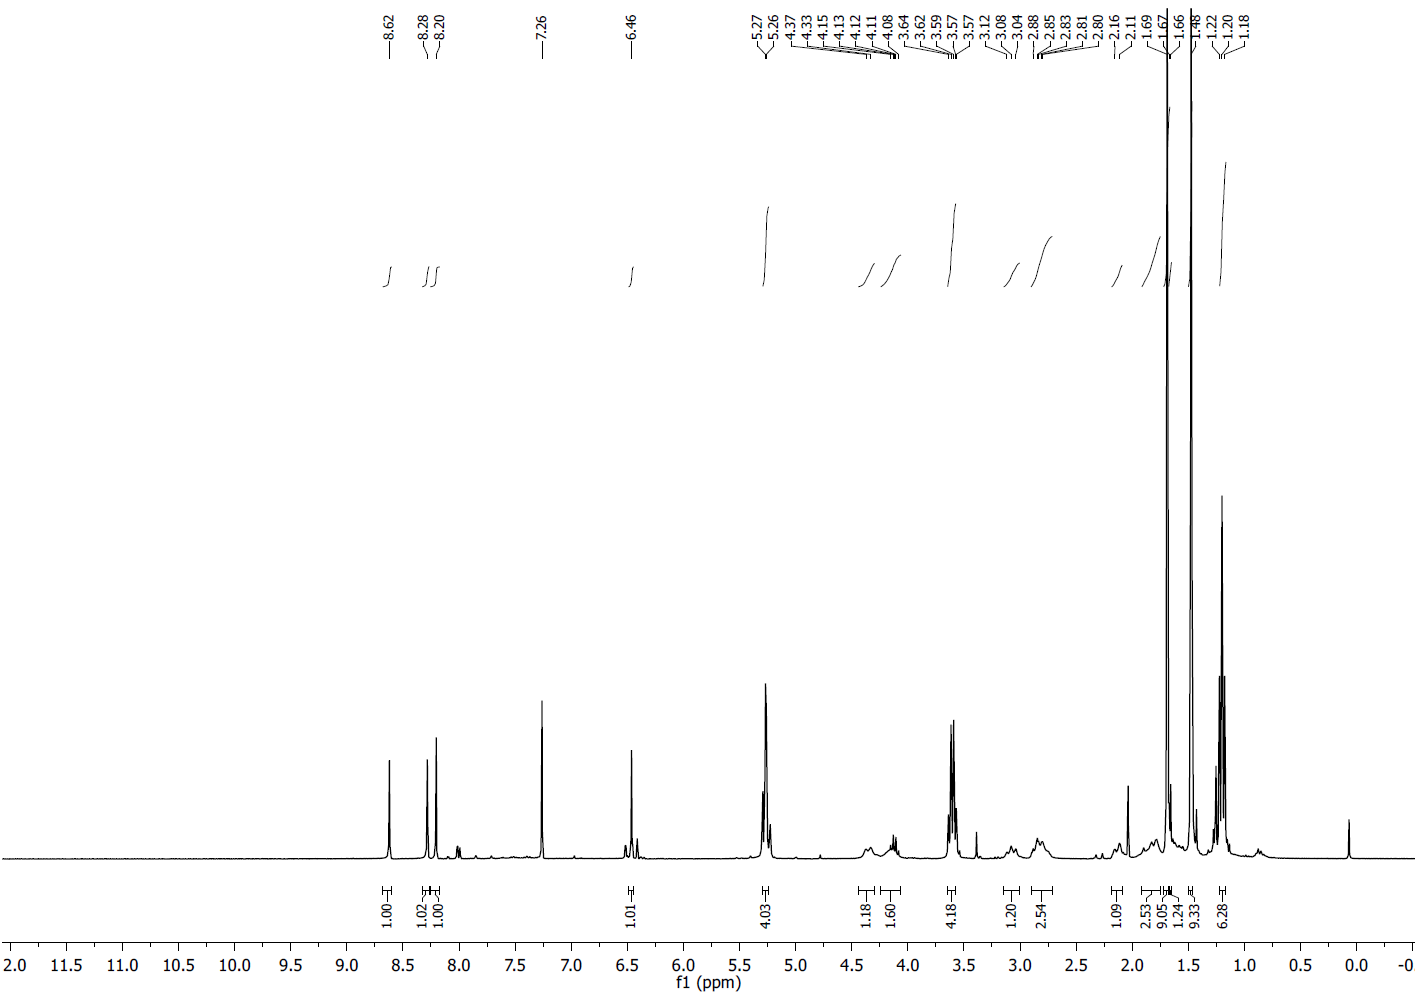


HRMS of compound **14**


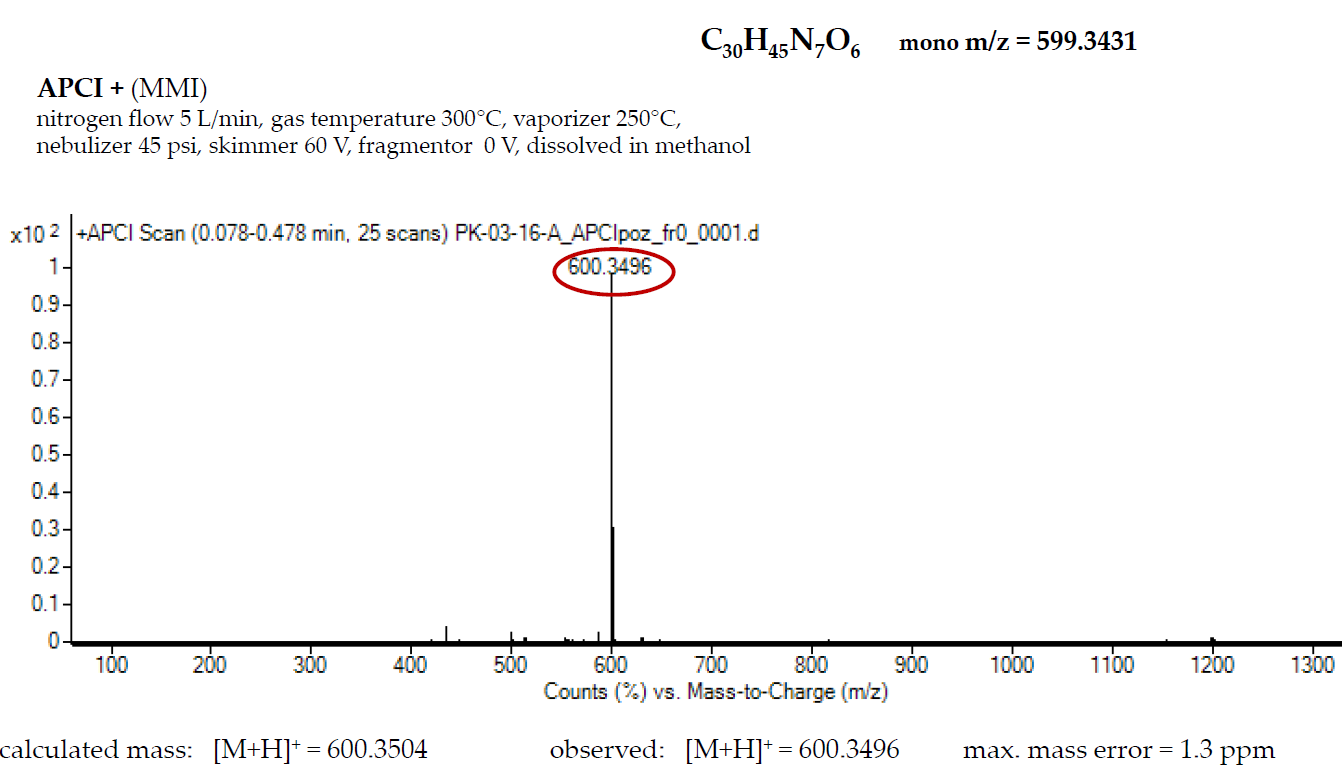

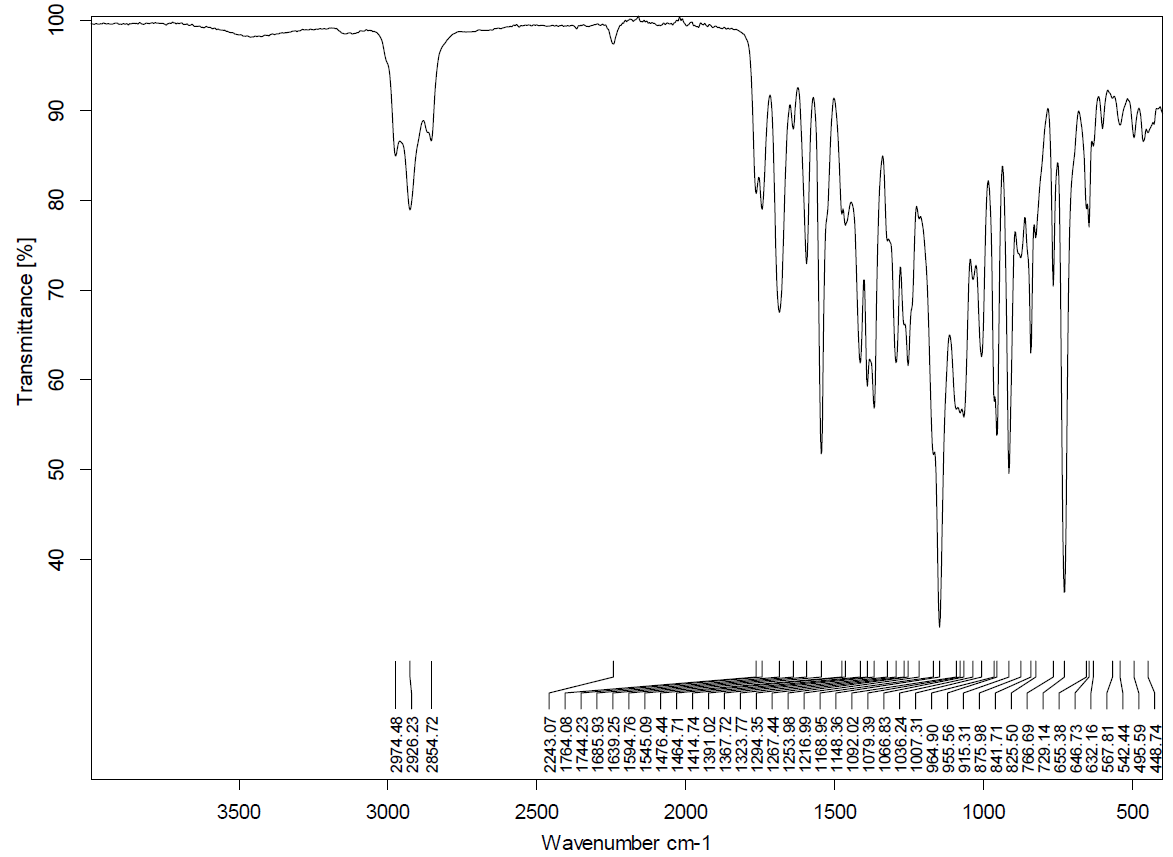


IR spectrum of compound **14**


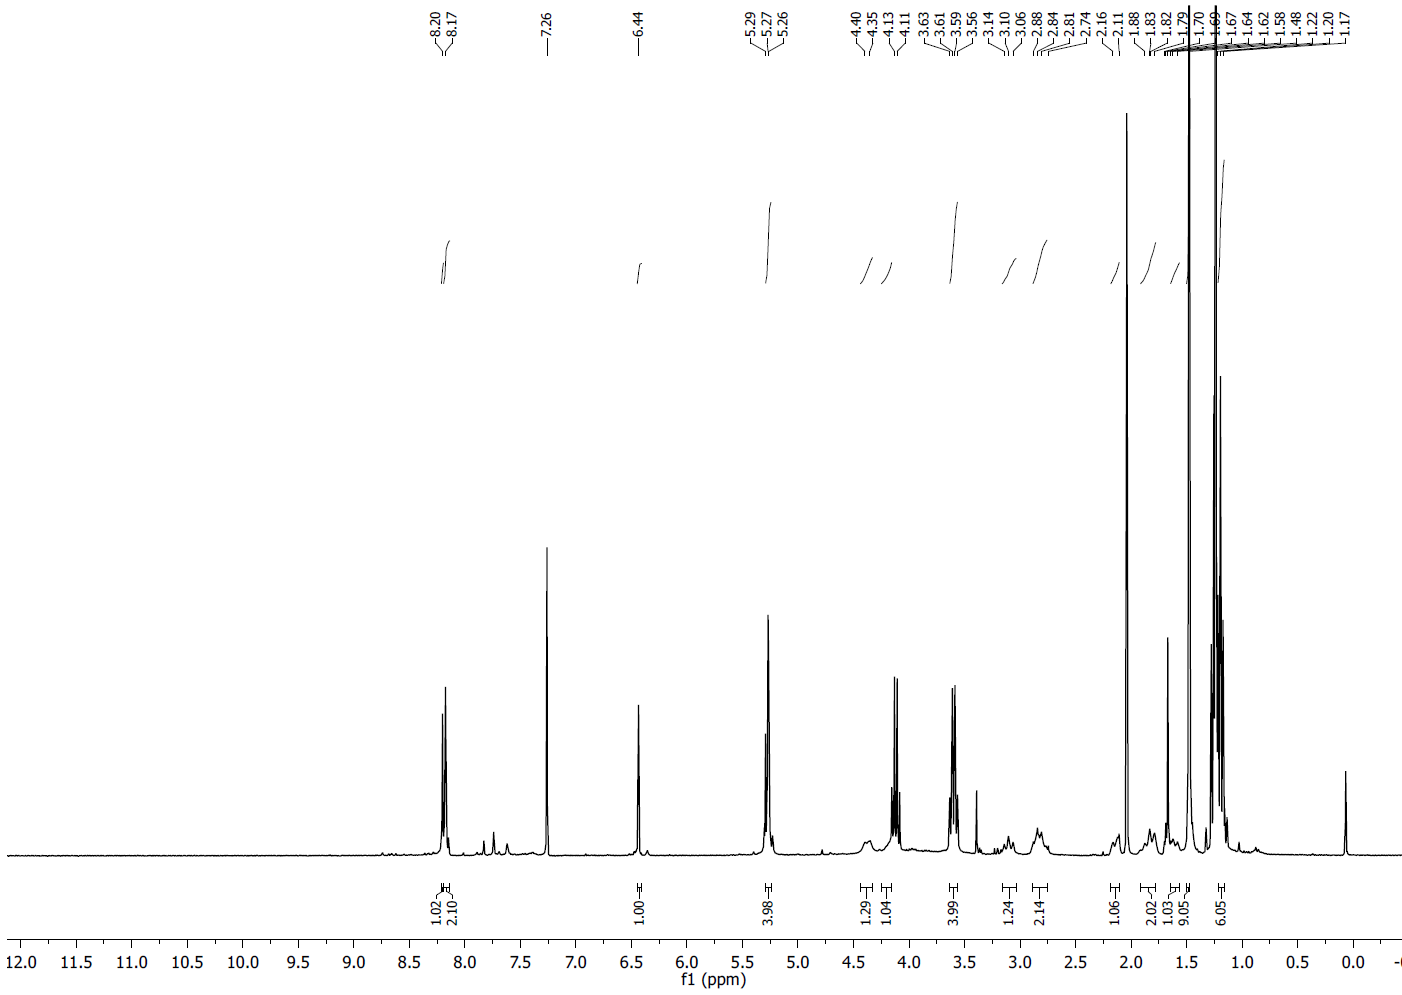


1H NMR (300MHz) spectrum of compound **14a** in CDCl3

HRMS of compound **14a**


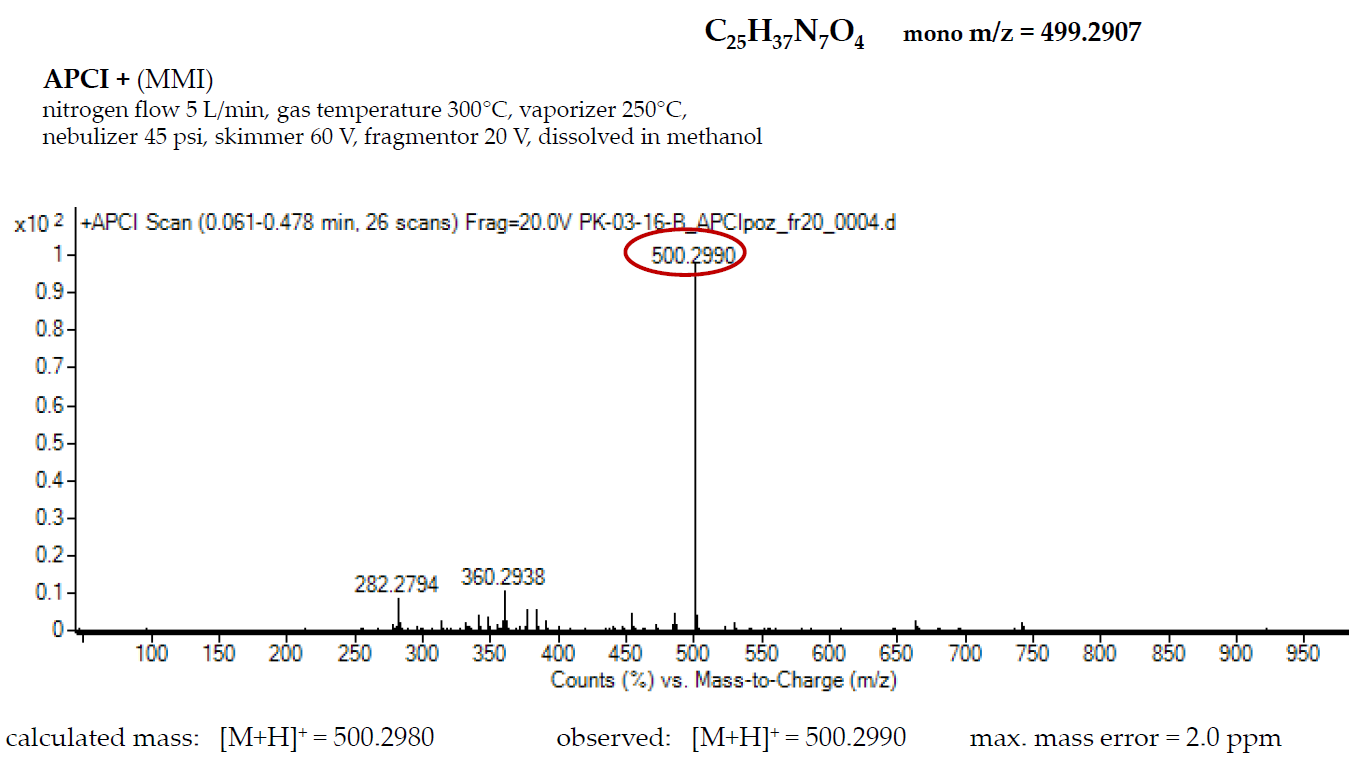


IR spectrum of compound **14a**


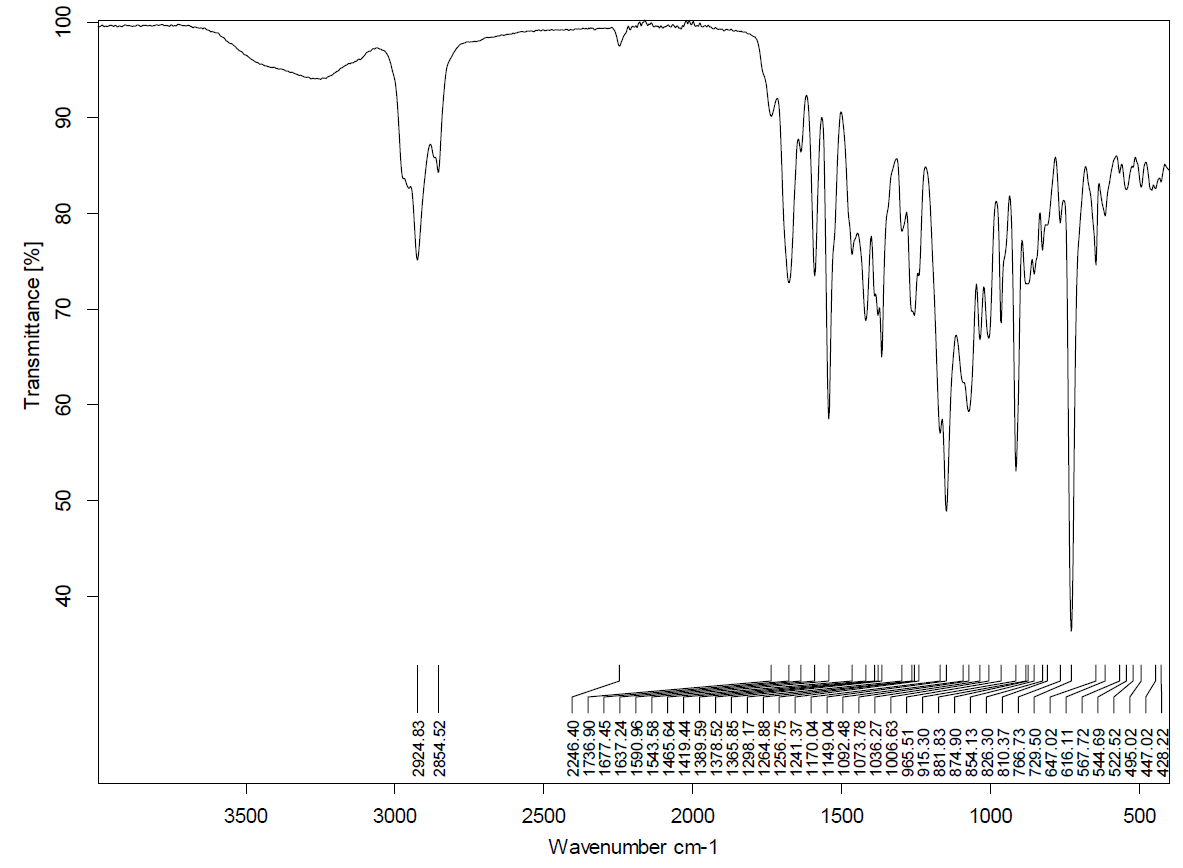


1H NMR (500MHz) spectrum of compound **15** in DMSO-*d6*


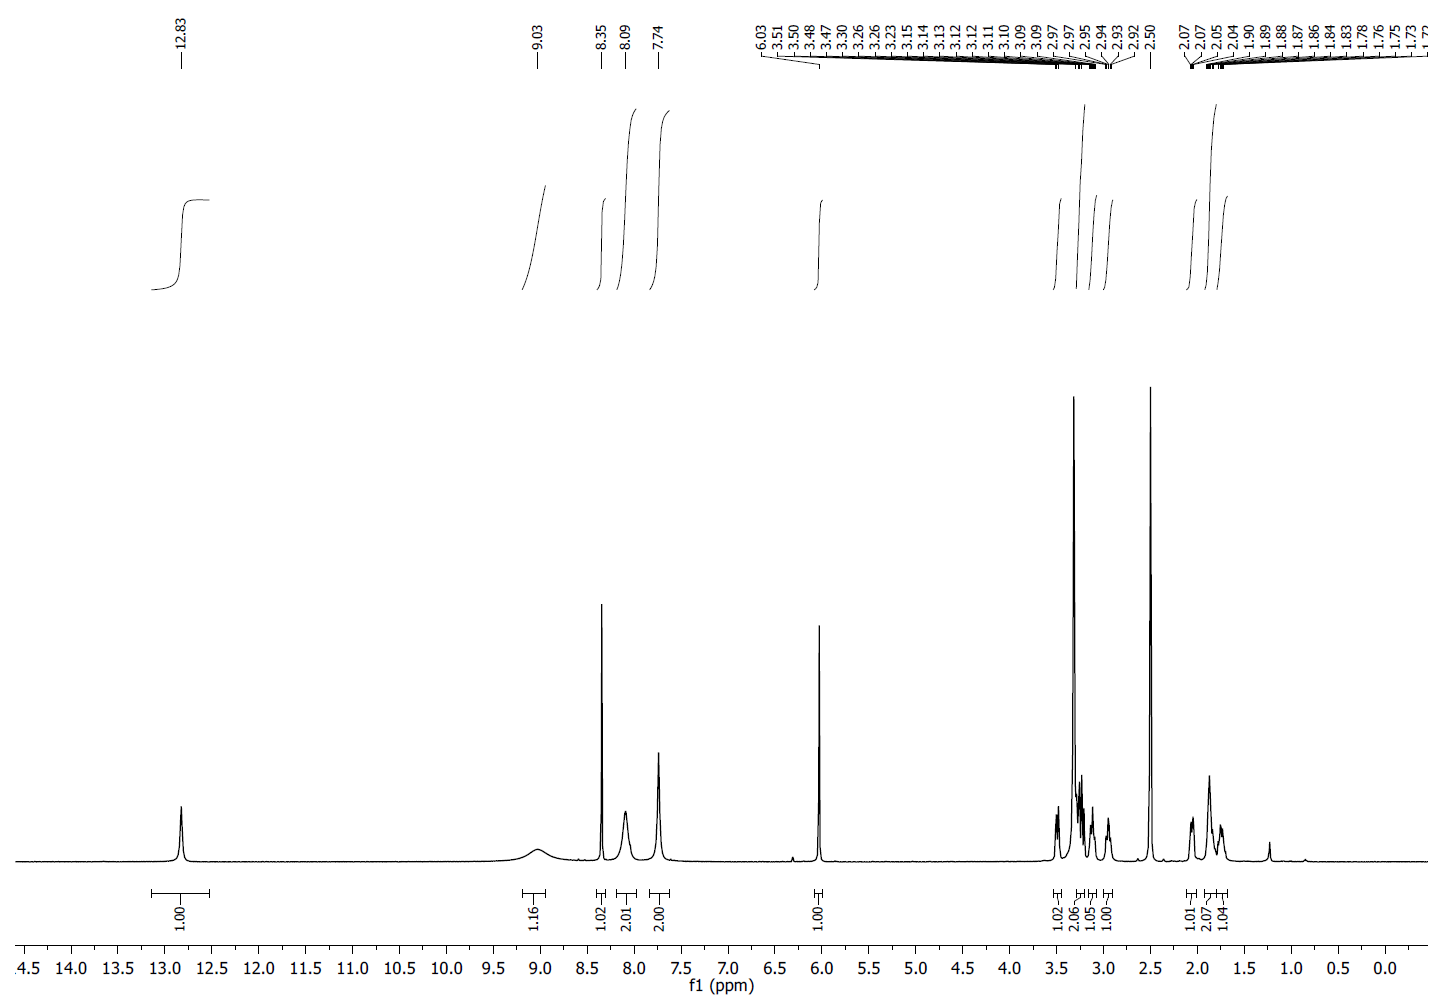


13C NMR (126 MHz) spectrum of compound **15** in DMSO-*d6*


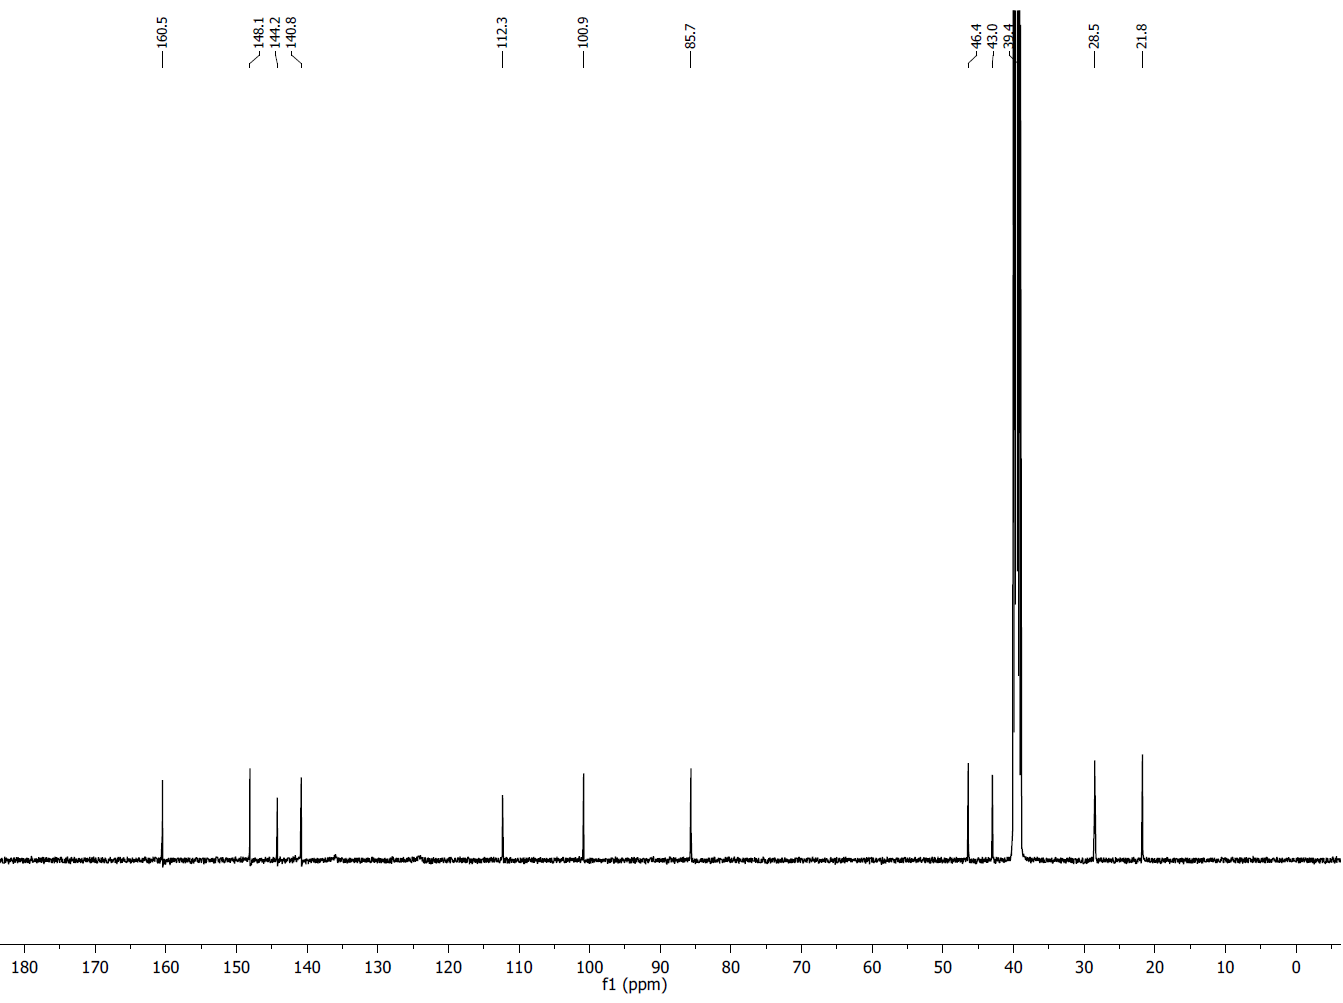


HRMS of compound **15**


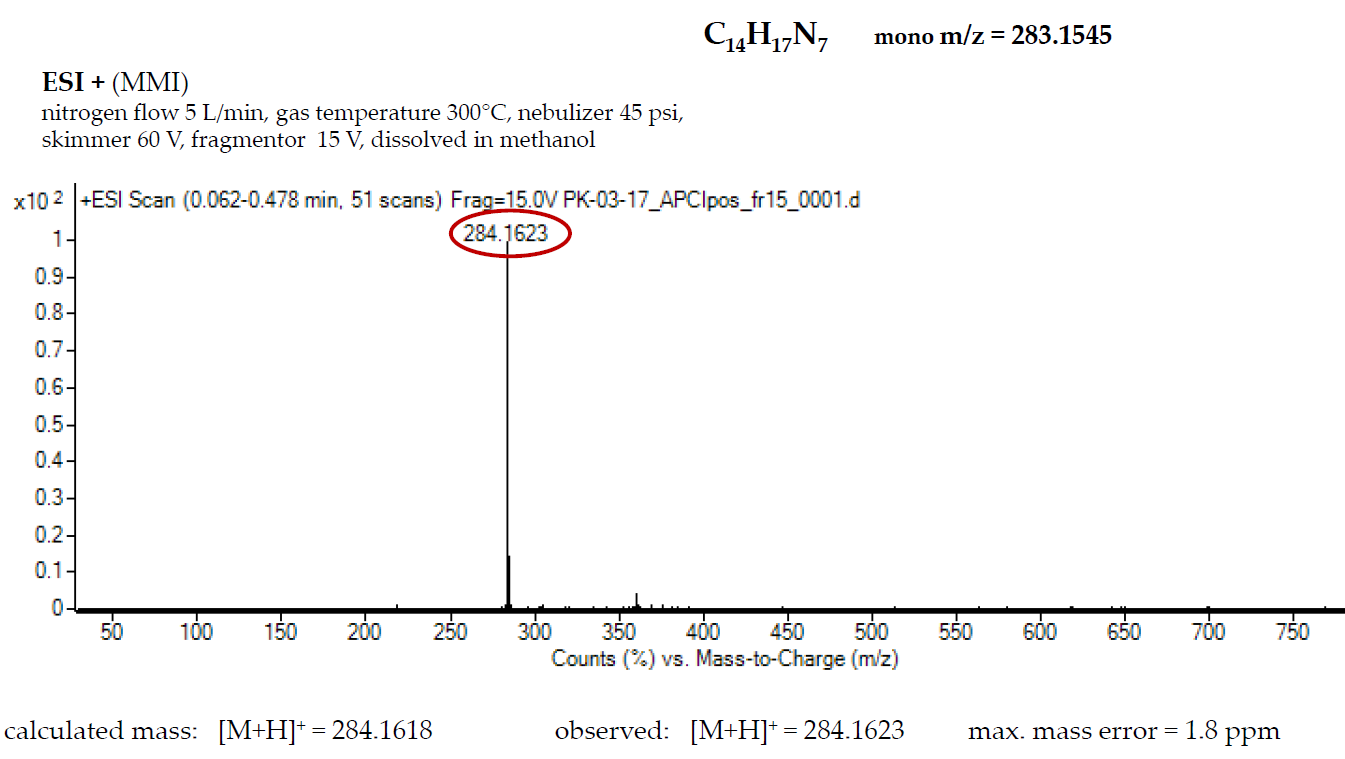


IR spectrum of compound **15**


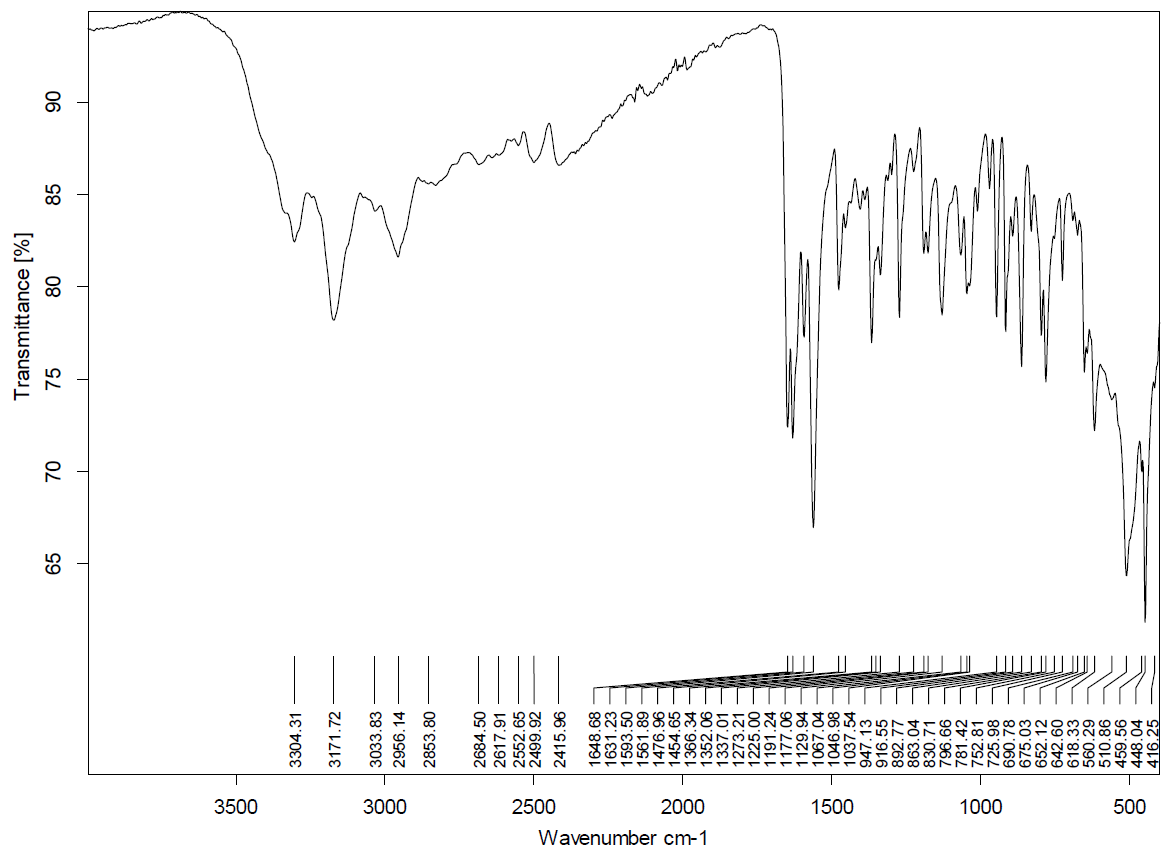


1H NMR (500MHz) spectrum of compound **16** in DMSO-*d6*


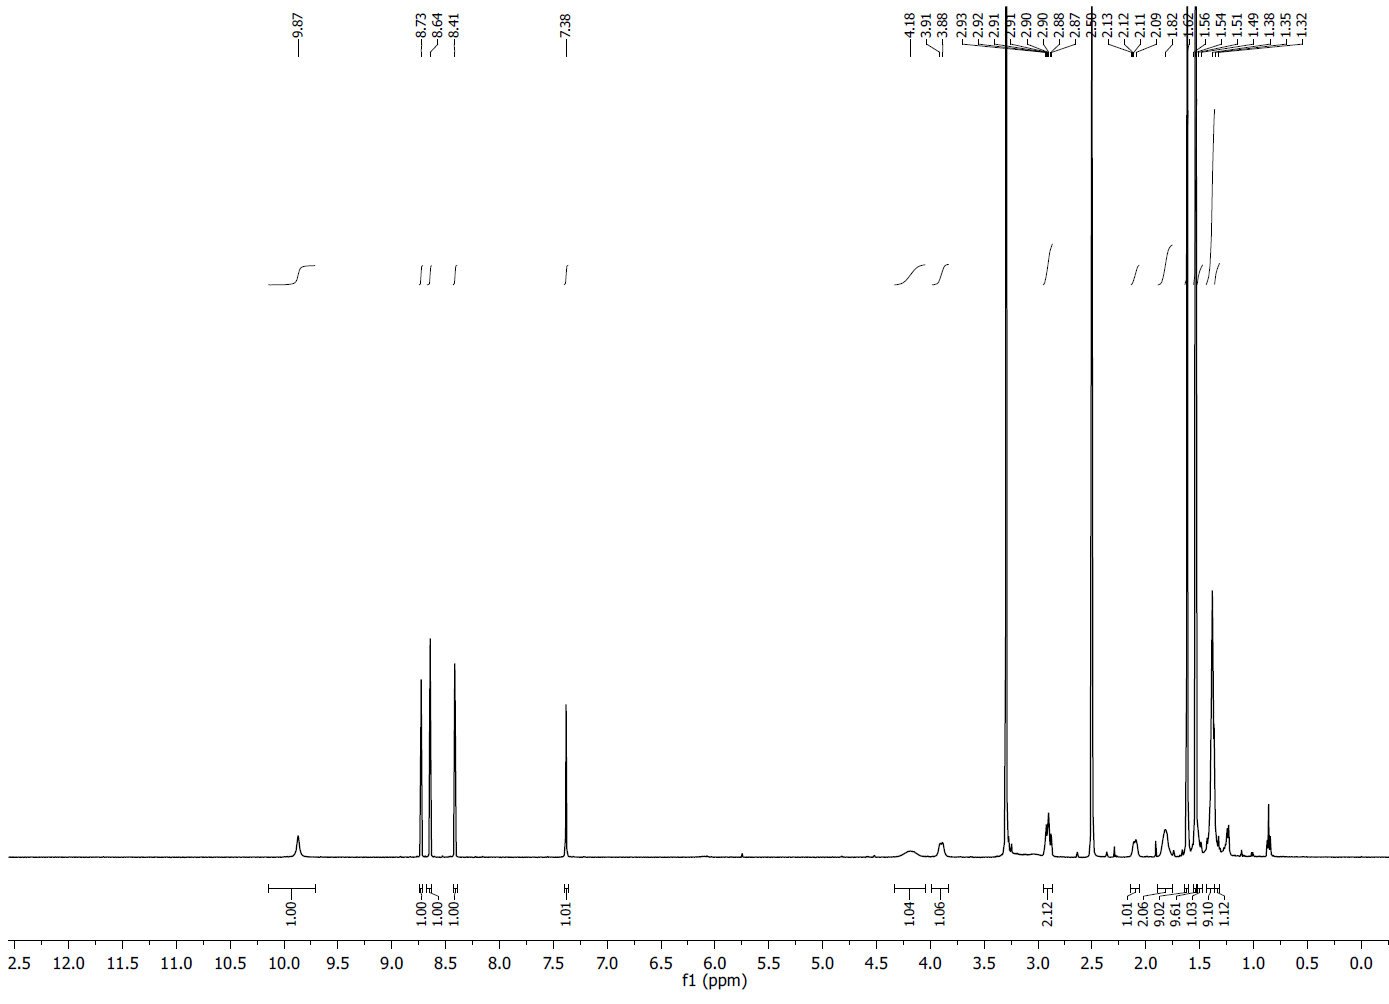

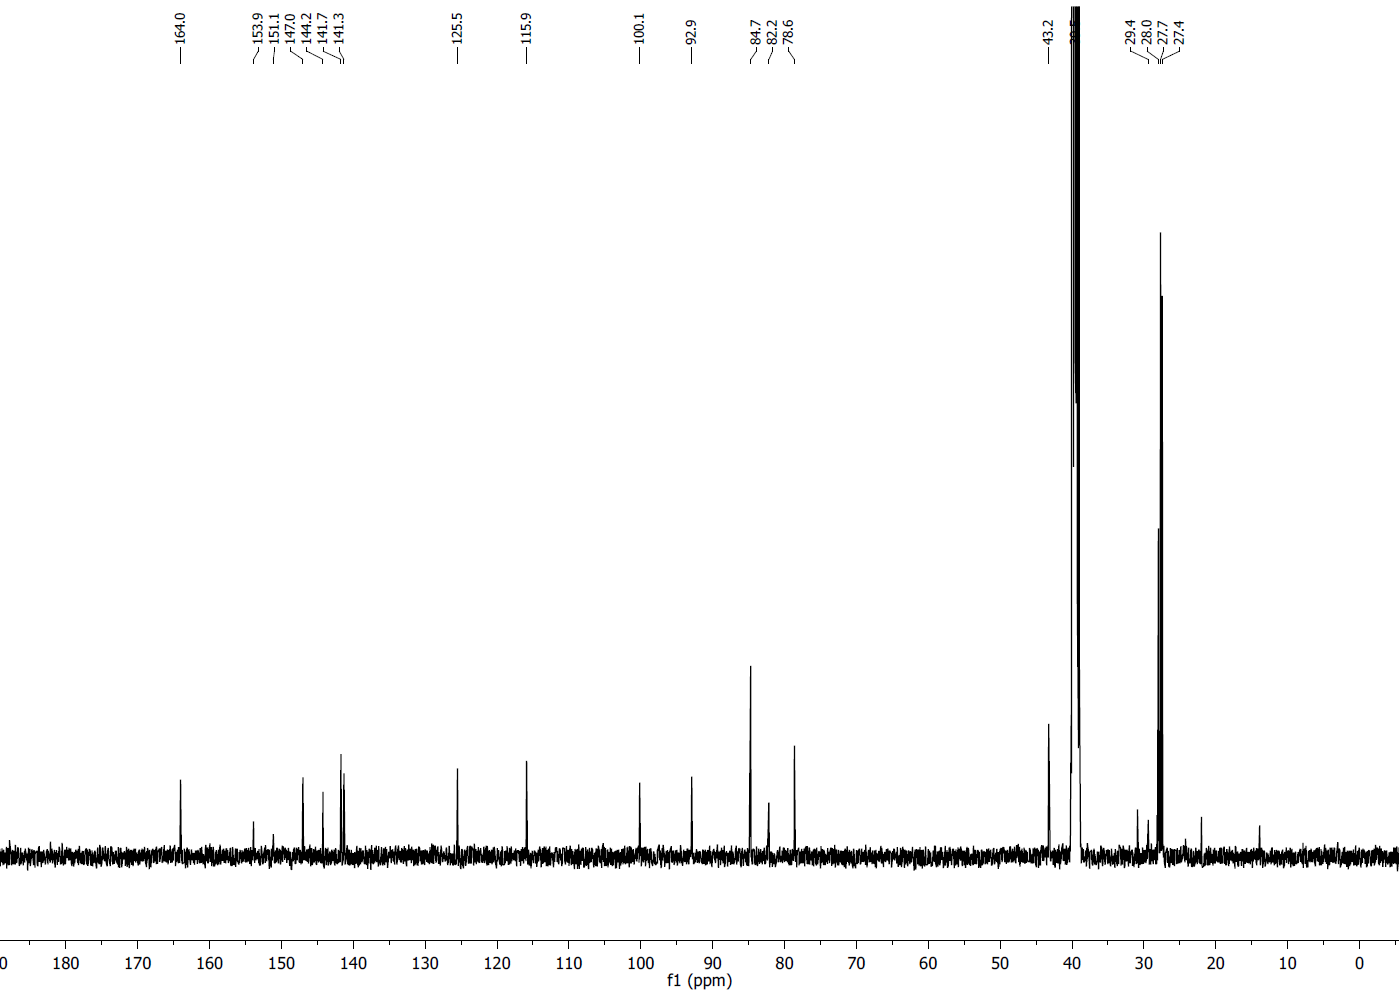


13C NMR (126 MHz) spectrum of compound **16** in DMSO-*d6*

HRMS of compound **16**


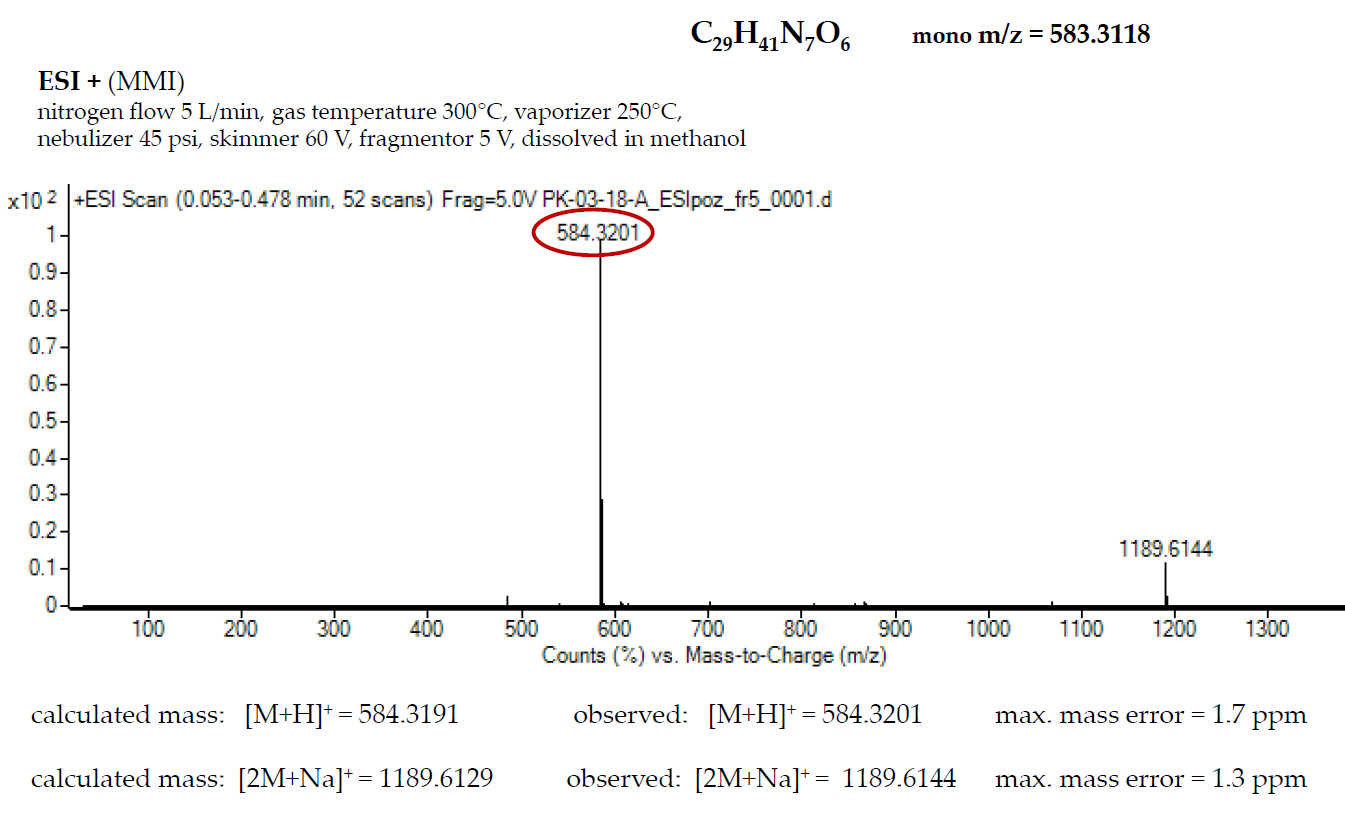


IR spectrum of compound **16**


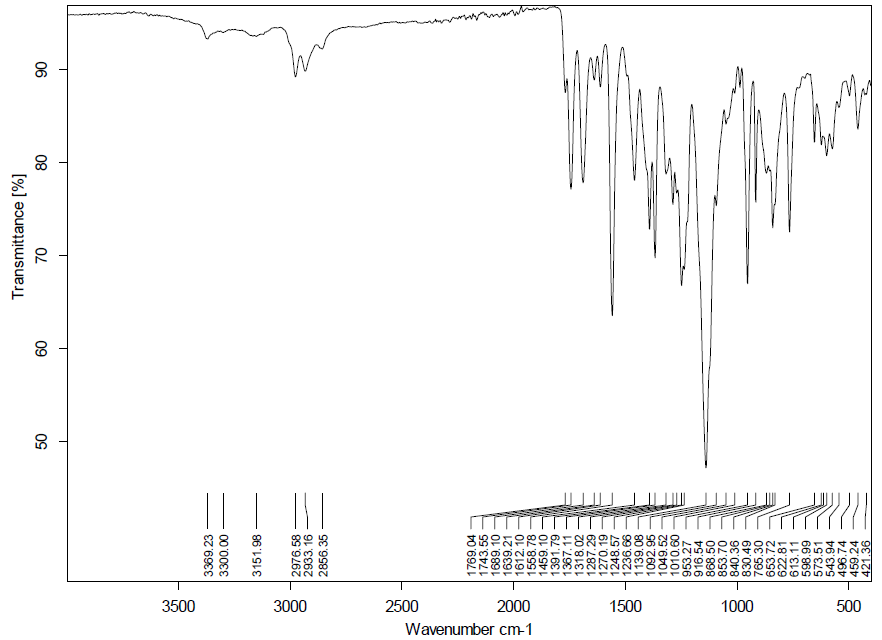


1H NMR (500MHz) spectrum of compound **17** in CDCl3


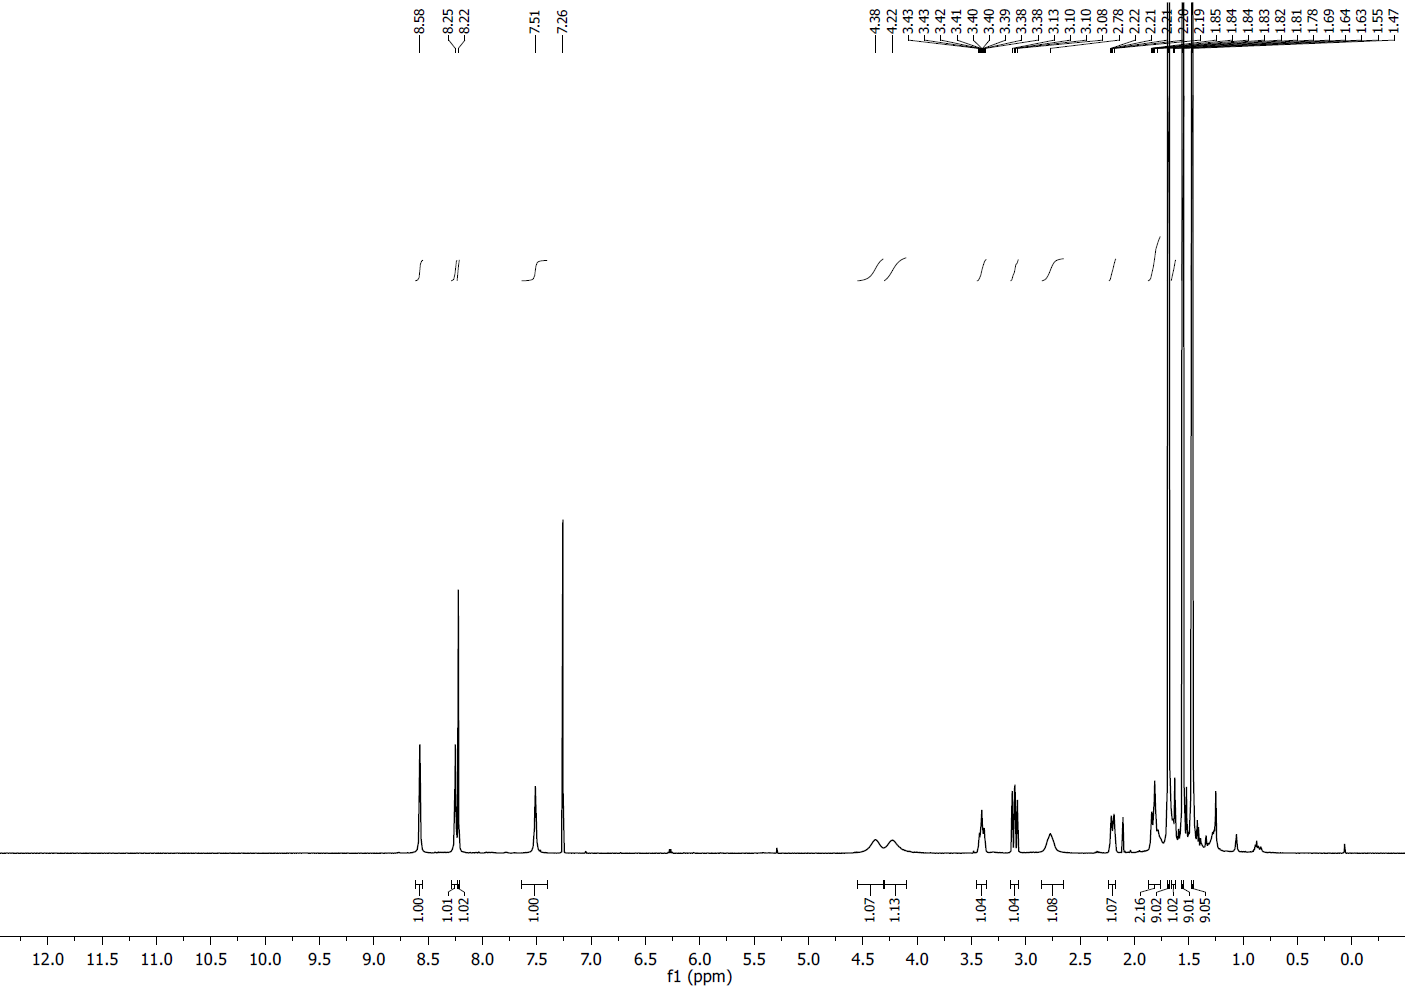

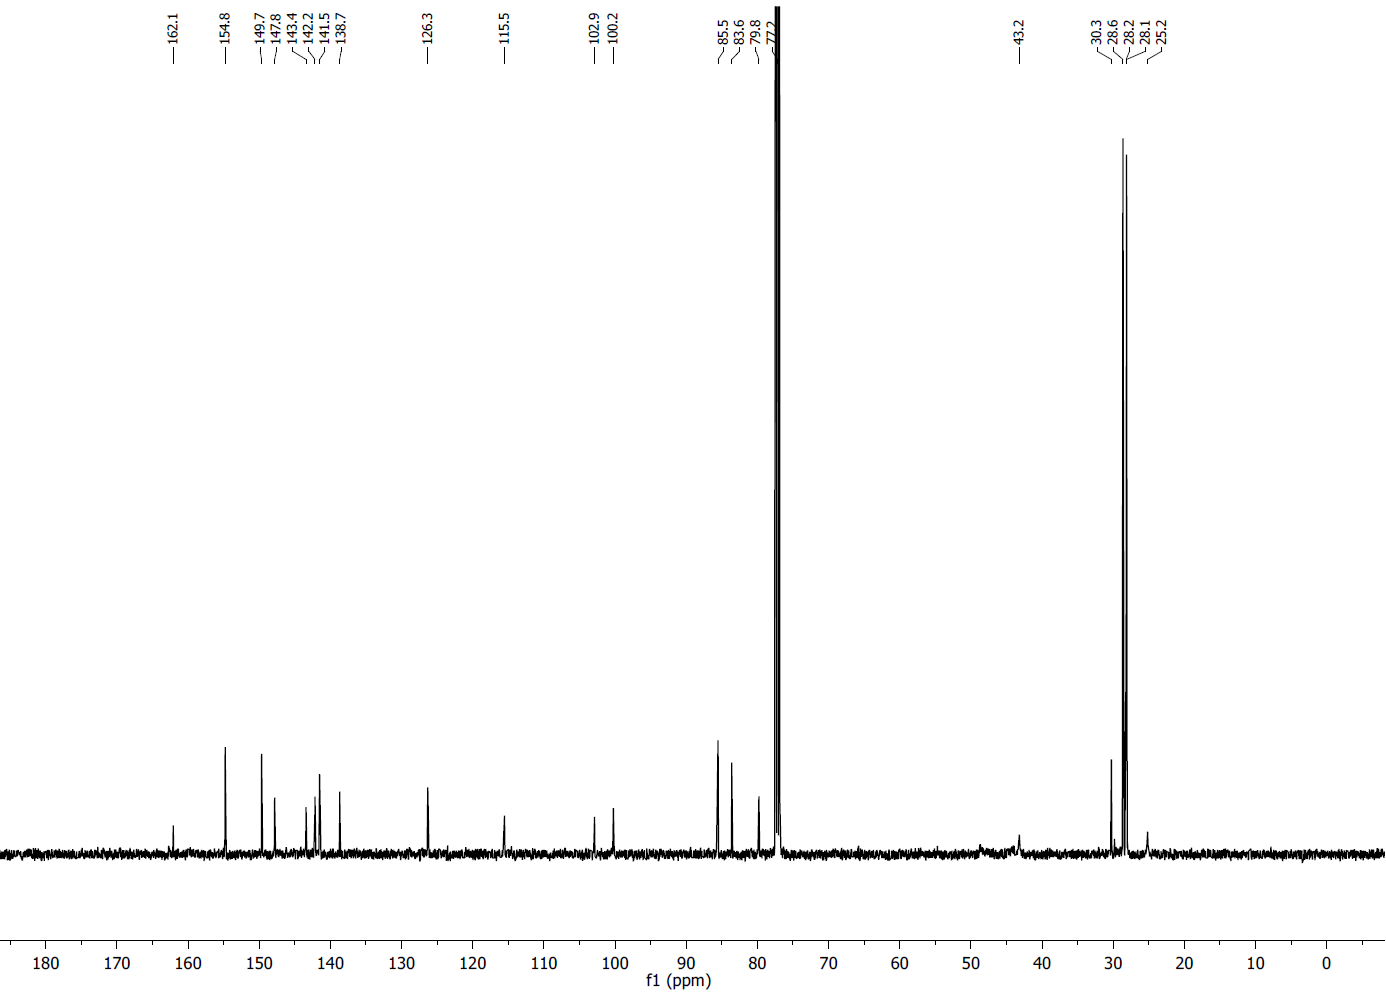


13C NMR (126 MHz) spectrum of compound **17** in CDCl3

HRMS of compound **17**


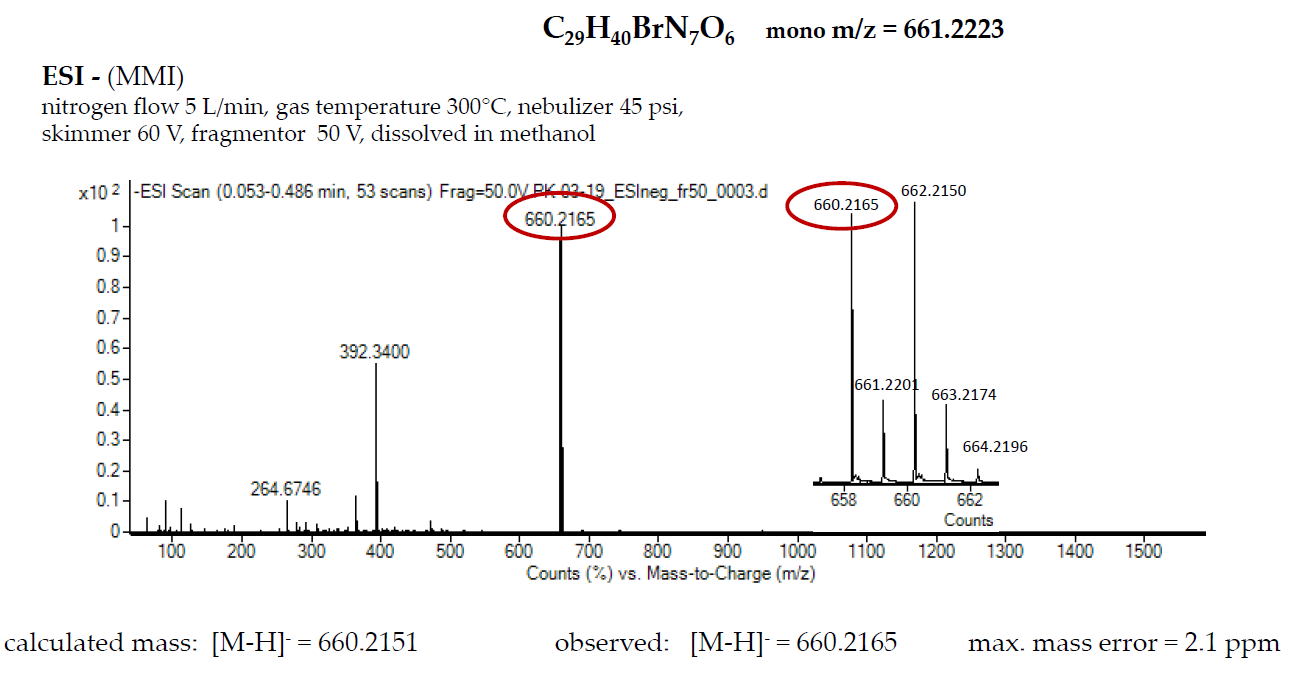


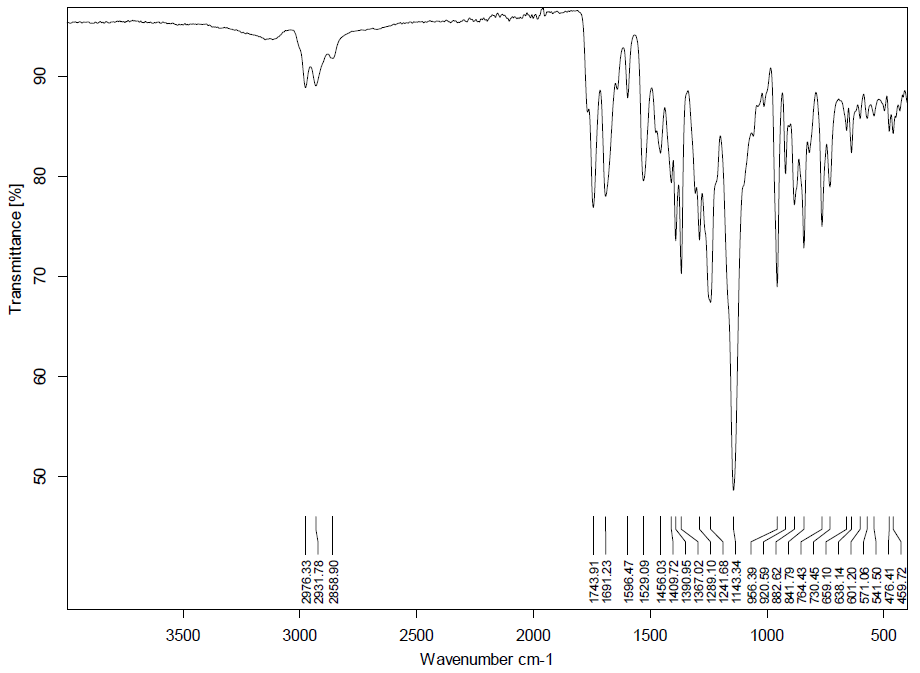


IR spectrum of compound **17**

1H NMR (500MHz) spectrum of compound **18** in DMSO-*d6*


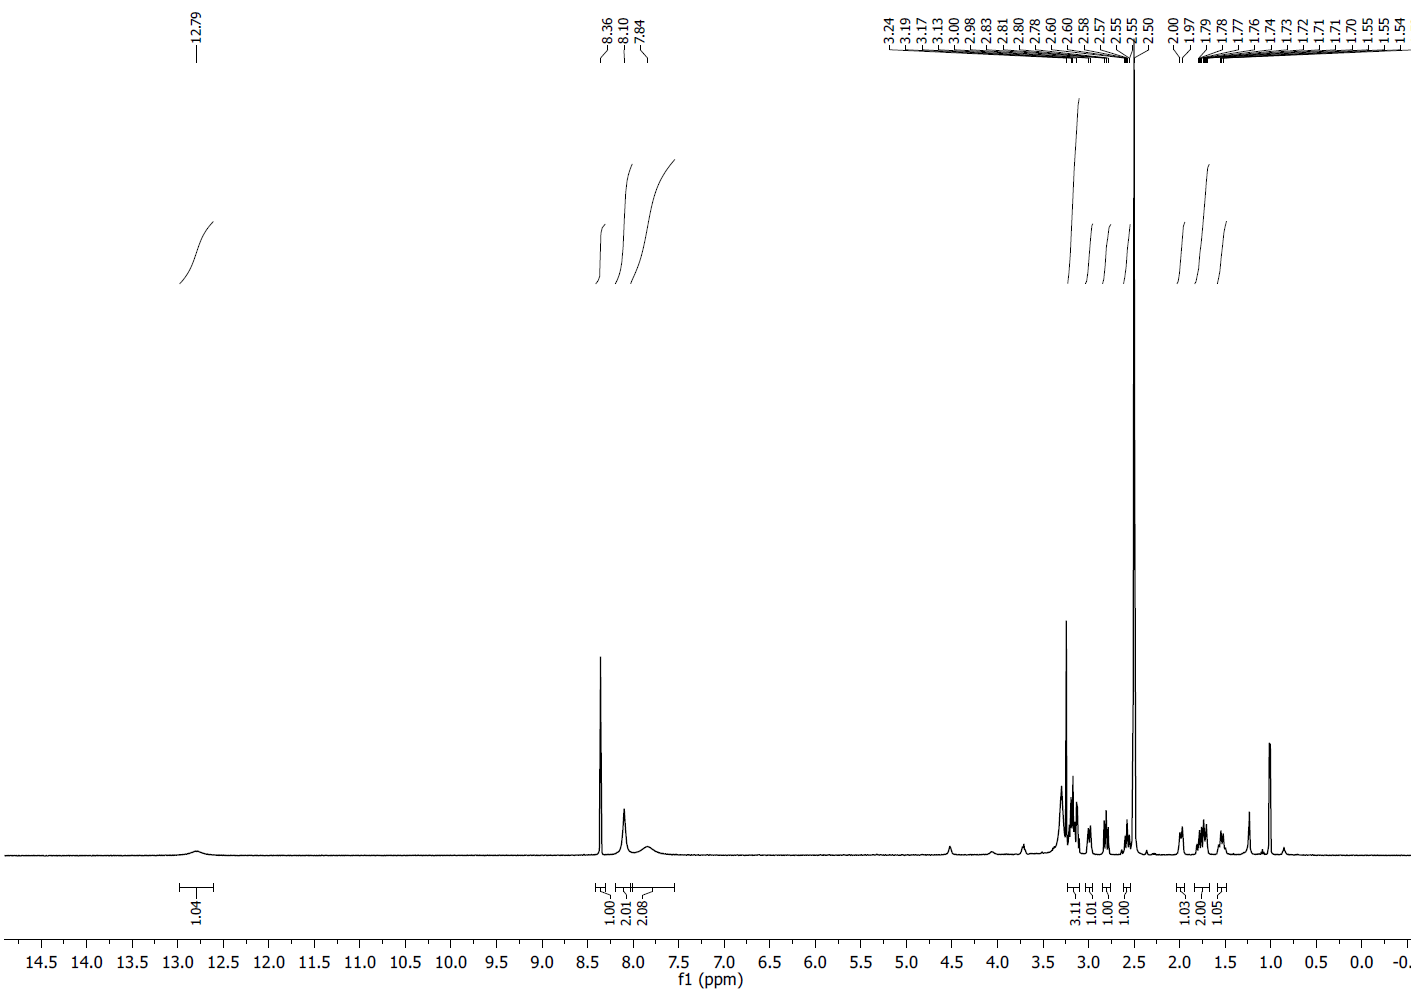

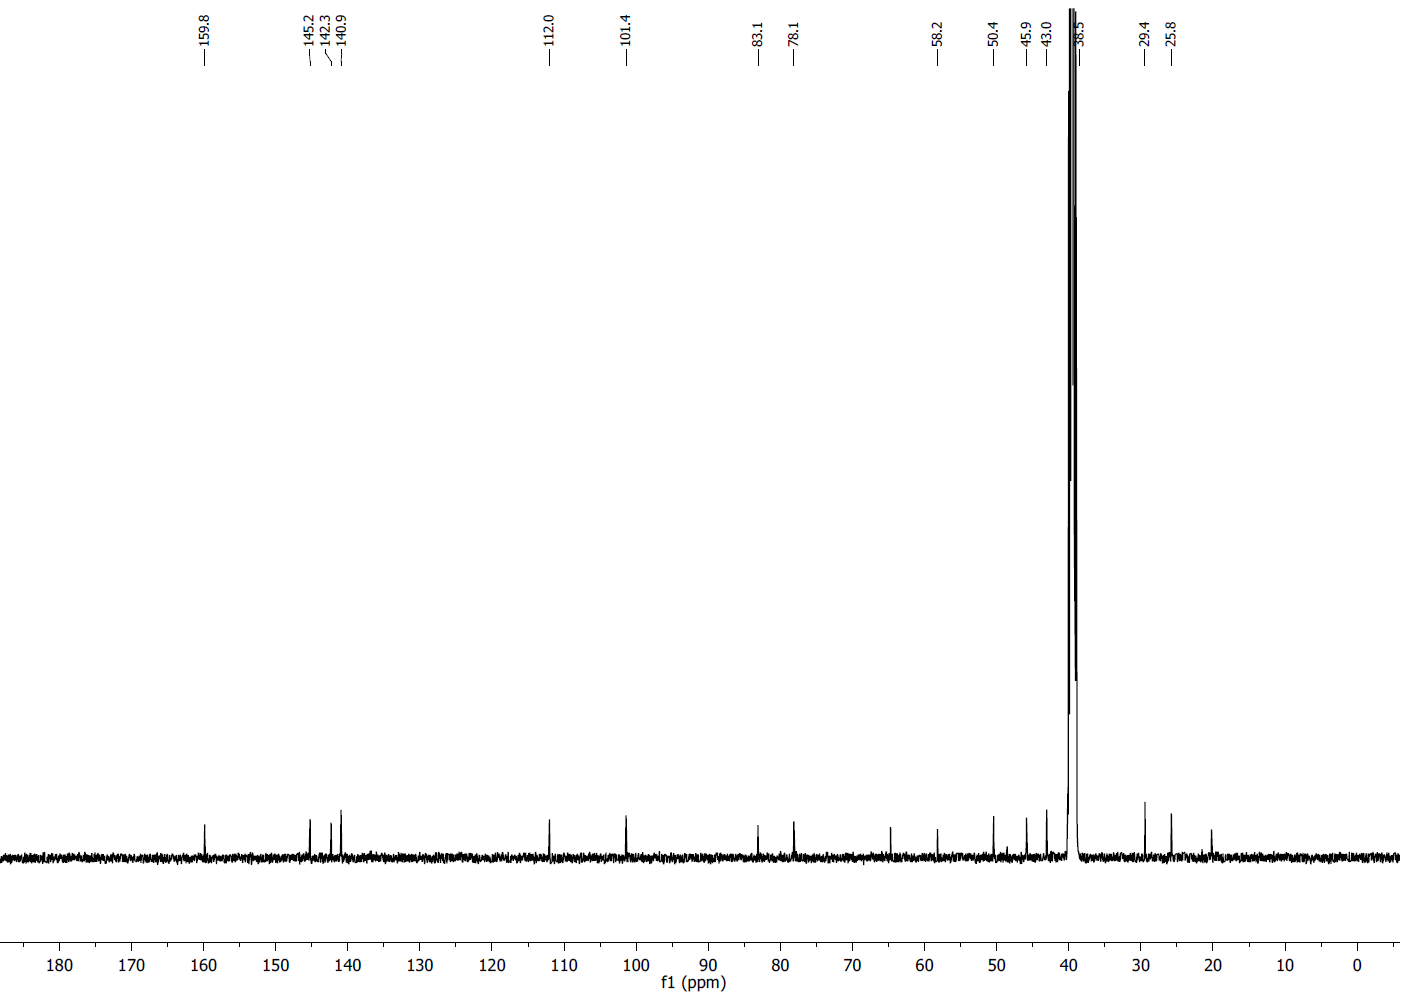


13C NMR (126 MHz) spectrum of compound **18** in DMSO-*d6*

HRMS of compound **18**


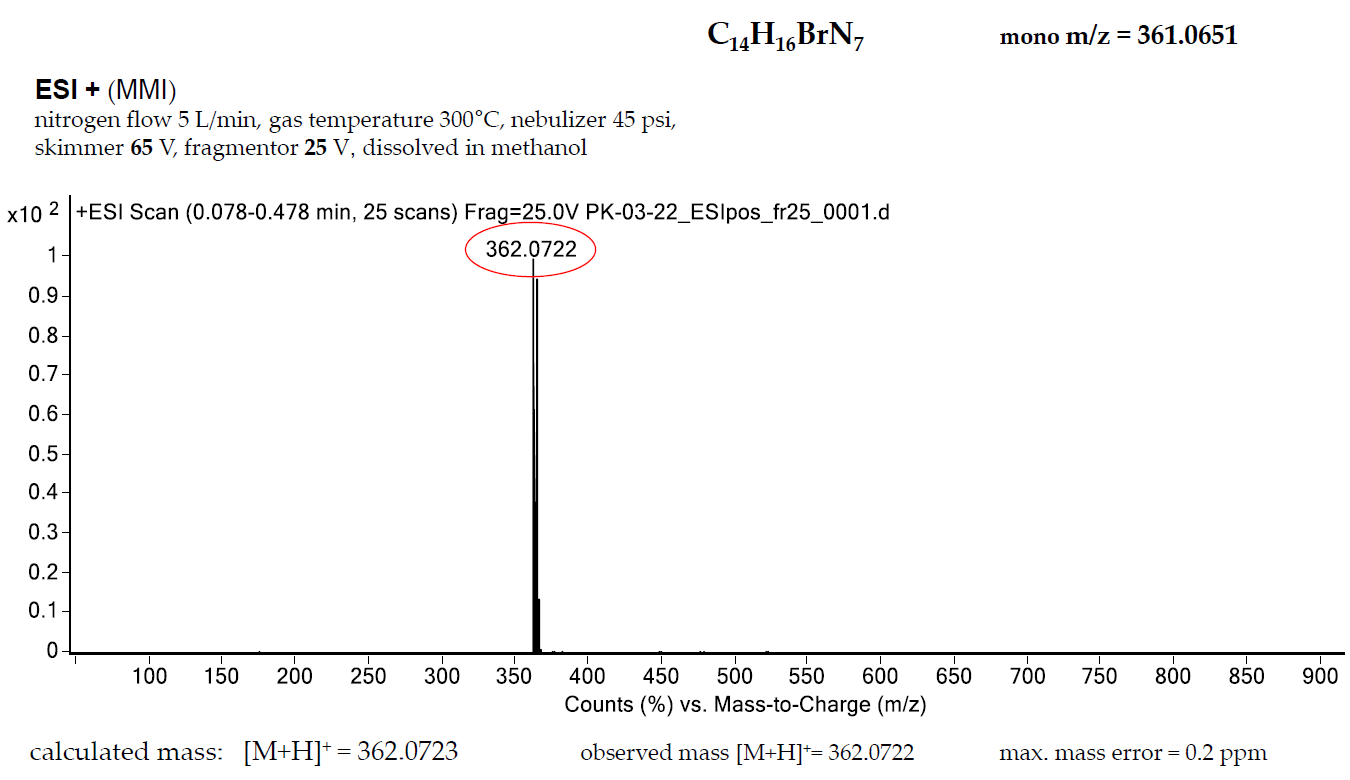


IR spectrum of compound **18**


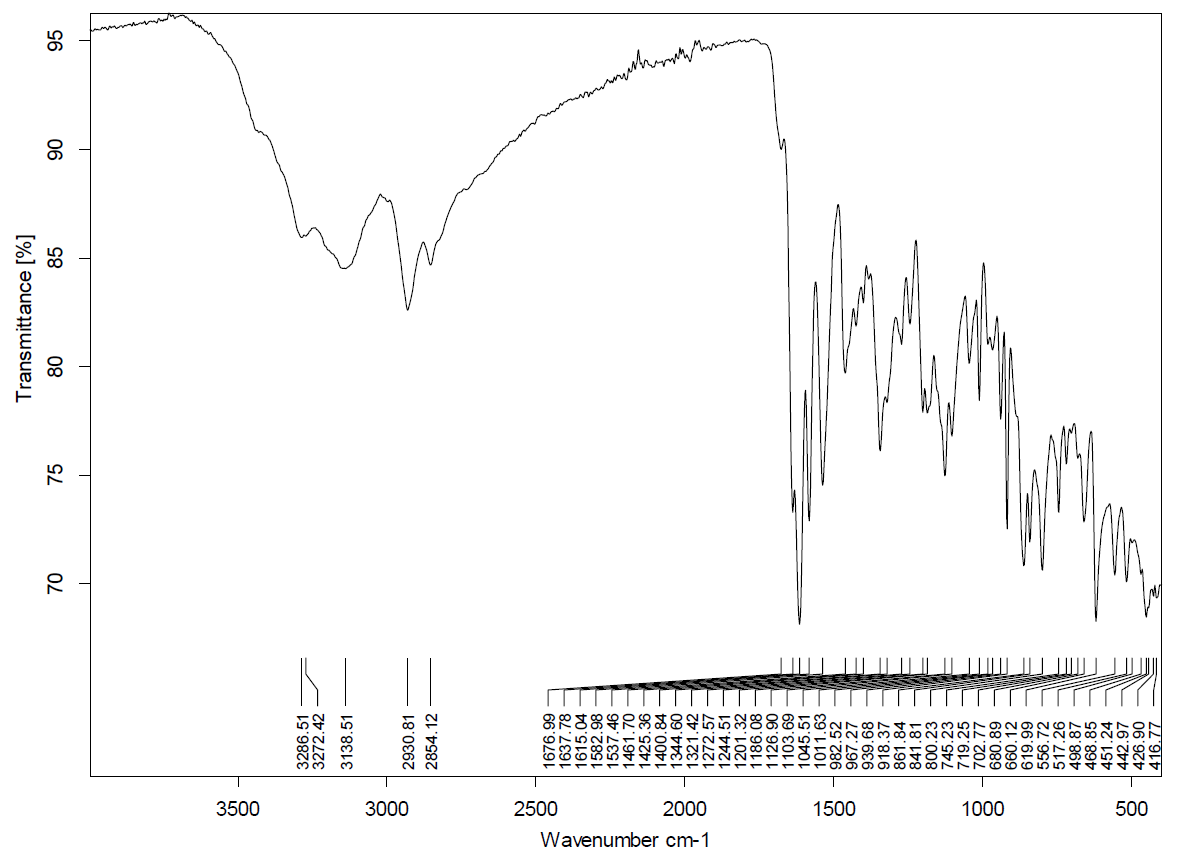


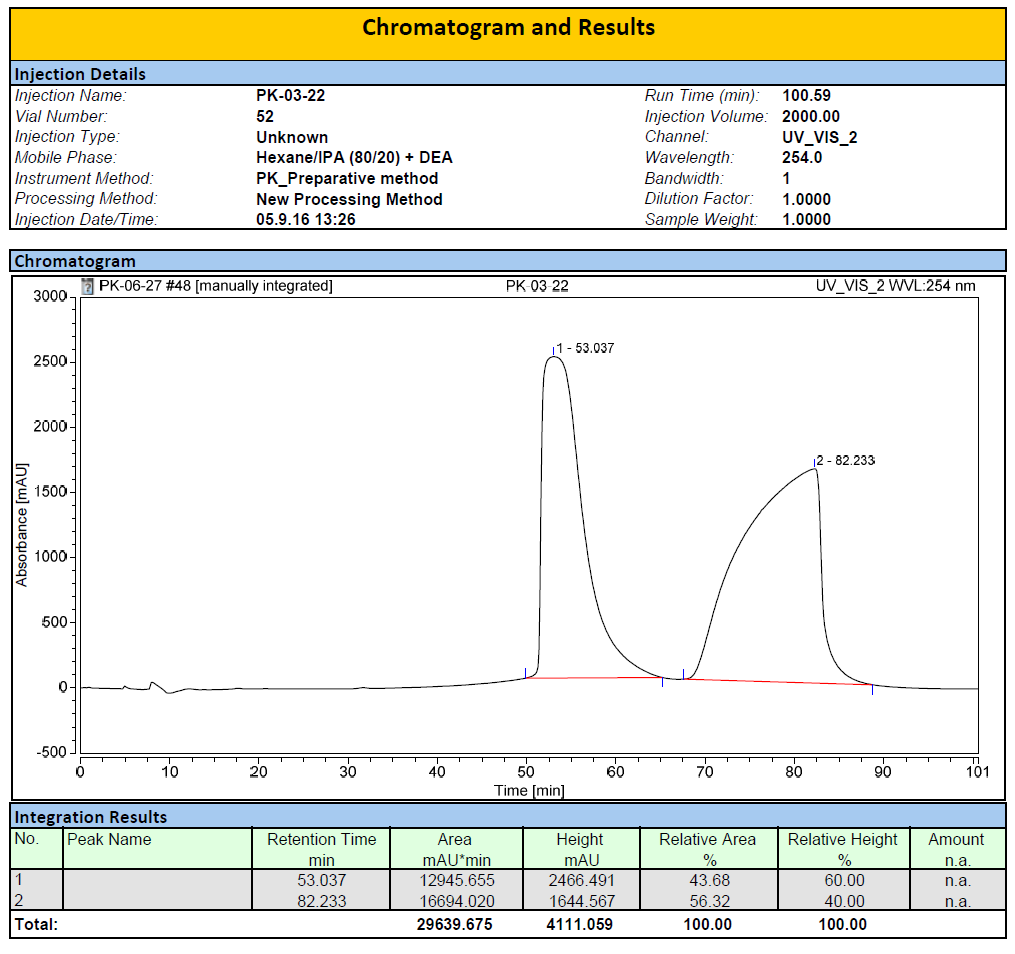


HPLC chromatogram of racemic compound **18** (semipreparative)

CD spectra of compounds **SCH900776** (blue, c = 0.4 mg/mL in MeOH), **MU380** (red, c = 0.4 mg/mL in MeOH), **MU379** (violet, c = 0.4 mg/mL in MeOH) and **ent-MU379** (green, c = 0.4 mg/mL in MeOH)

**5-(azetidin-3-yl)-6-bromo-3-(1-(trifluoromethyl)-1H-pyrazol-4-yl)pyrazolo[1,5-a]pyrimidin-7-amine (MU381):**

White solid

m.p. = 202 – 205 °C

1H NMR (500 MHz, DMSO-*d6*): *δ* = 8.76 (s, 1H), 8.57 (s, 1H), 8.54 (s, 1H), 4.25 – 4.18 (m, 1H), 3.96 (s, 2H), 3.76 (s, 2H) ppm

13C NMR (126 MHz, DMSO-*d6*): *δ* = 159.3, 145.5, 143.1, 141.9, 141.7, 123.9, 119.1 (q, 1*J*C-F = 261.3 Hz), 116.7, 98.5, 82.9, 50.1, 40.6 ppm

19F NMR (471 MHz, DMSO-*d6*): *δ* = -59.18 (s) ppm

HRMS (ESI): calculated for C13H11BrF3N7 [M+H]+: 402.0284, found 402.0285

IR (ν˜max, neat) = 3352, 3295, 2973, 2920, 2863, 1649, 1633, 1587, 1550, 1462.99, 1418, 1394, 1359, 1315, 1287, 1272, 1152, 1126, 936, 917, 870, 859, 793, 739, 707, 656, 624, 578. cm-1

**5-(azetidin-3-ylmethyl)-6-bromo-3-(1-(trifluoromethyl)-1H-pyrazol-4-yl)pyrazolo[1,5-a]pyrimidin-7-amine (MU382):**

White solid

m.p. = 190 – 193 °C

1H NMR (500 MHz, CD3OD): *δ* = 8.50 (s, 1H), 8.38 (s, 1H), 8.33 (s, 1H), 4.33 – 4.29 (m, 2H), 4.06 – 4.02 (m, 2H), 3.68 – 3.62 (m, 1H), 3.37 (d, *J* = 7.7 Hz, 2H) ppm

13C NMR (126 MHz, CD3OD): *δ* = 158.0, 147.2, 144.8, 143.1, 143.0, 125.0, 119.4 (q, 1*J*C-F = 293.1 Hz), 118.3, 100.5, 84.9, 52.8, 41.3, 31.8 ppm

HRMS (APCI): calculated for C14H13BrF3N7 [M+H]+: 416.0441, found 416.0437

IR (ν˜max, neat) = 2955, 2923, 2853, 1673, 1643, 1619, 1588, 1541, 1418, 1355, 1286, 1173, 1128, 997, 943, 921, 837, 798, 721 cm-1

**5-(2-amino-2-methylpropyl)-6-bromo-3-(1-(trifluoromethyl)-1H-pyrazol-4-yl)pyrazolo[1,5-a]pyrimidin-7-amine (MU383):**

White solid

m.p. = 127-130 °C

1H NMR (500 MHz, DMSO-*d6*): *δ* = 8.70 (s, 1H), 8.52 (s, 1H), 8.51 (s, 1H), 3.02 (s, 2H), 1.19 (s, 6H) ppm

13C NMR (126 MHz, DMSO-*d6*): *δ* = 157.7, 145.6, 142.8, 141.8, 123.8, 119.1 (q, 1*J*C-F = 261.2 Hz), 116.8, 98.1, 85.8, 51.2, 49.3, 30.2 ppm

19F NMR (471 MHz, DMSO-*d6*): *δ* = -59.23 (s) ppm

HRMS (ESI): calculated for C14H15BrF3N7 [M-H]-: 416.0452, found 416.0449

IR (ν˜max, neat) = 3411, 3362, 3348, 2959, 1631, 1600, 1545, 1471, 1415, 1320, 1286, 1268, 1213, 1173, 1127, 1066, 1000, 941, 904, 873, 844, 797, 778, 764, 738, 627, 540, 520 cm-1

**5-(1-amino-2-methylpropan-2-yl)-6-bromo-3-(1-(trifluoromethyl)-1H-pyrazol-4-yl)pyrazolo [1,5-a]pyrimidin-7-amine (MU385):**

White solid

m.p. = 130-133 °C

1H NMR (500 MHz, CD3OD): *δ* = 8.52 (s, 1H), 8.38 (s, 1H), 8.35 (s, 1H), 3.39 (brs, 2H), 3.35 (s, 2H), 1.66 (s, 6H) ppm

13C NMR (126 MHz, CD3OD): *δ* = 162.3, 148.2, 143.4, 143.0, 125.1, 120.8 (q, 1*J*C-F = 261.2 Hz), 118.2, 101.2, 83.2, 51.7, 49.9, 44.7, 24.5 ppm

19F NMR (471 MHz, CD3OD): *δ* = -61.86 (s) ppm

HRMS (ESI): calculated for C14H15BrF3N7 [M+H]+: 418.0597, found 418.0598

IR (ν˜max, neat) = 3292, 2922, 2852, 1636, 1616, 1587, 1540, 1462, 1415, 1397, 1311, 1285, 1169, 1127, 1063, 1019, 939, 921, 871, 794, 738, 670, 625, 582 cm-1


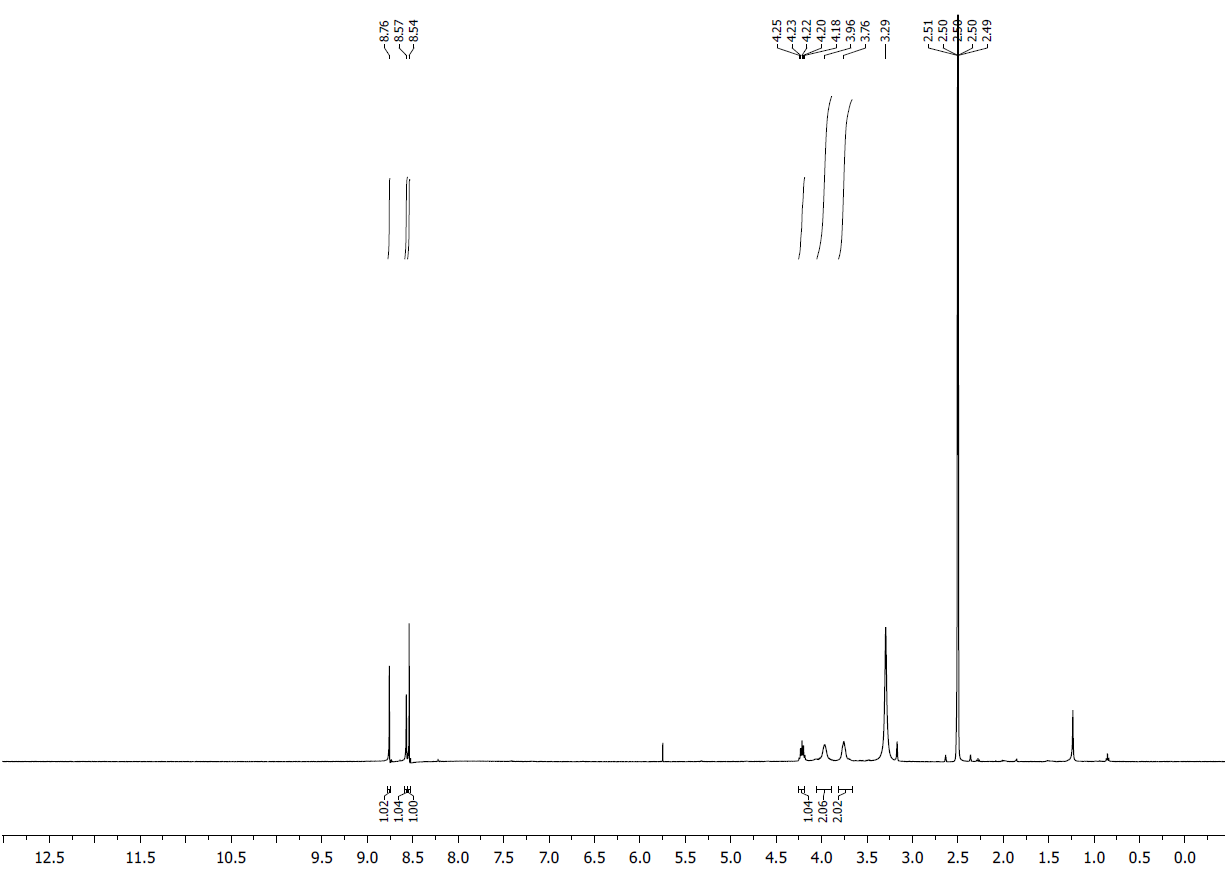


1H NMR (500MHz) spectrum of compound **MU381** in DMSO-*d6*


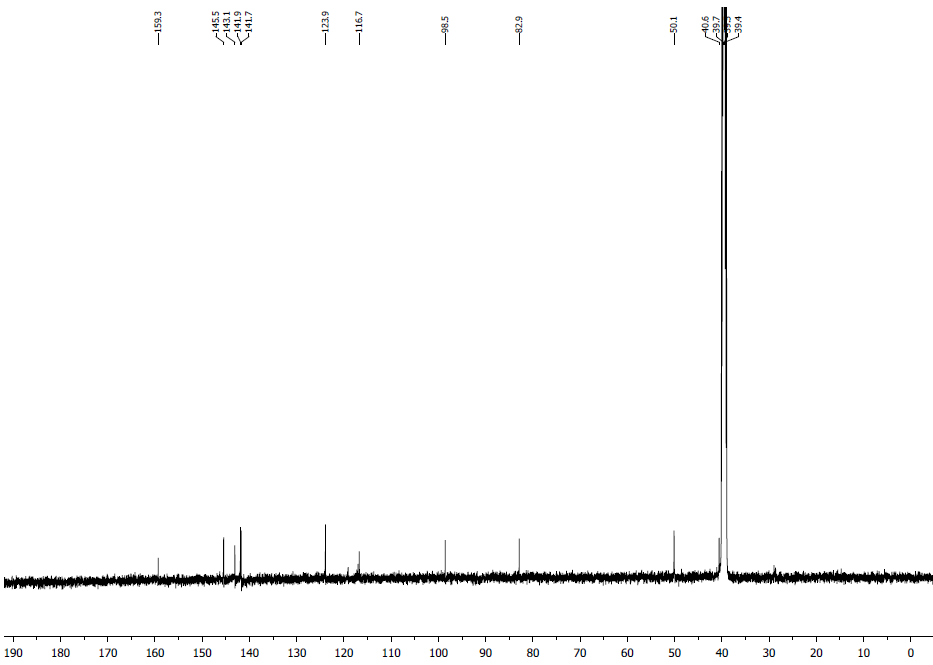


13C NMR (126 MHz) spectrum of compound **MU381** in DMSO-*d6*


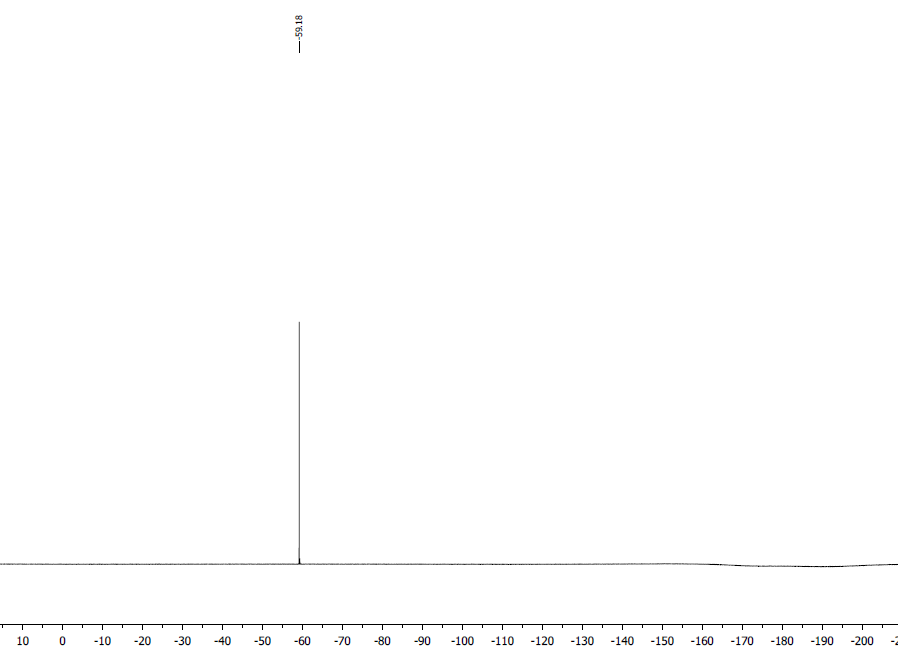


19F NMR (471MHz) spectrum of compound **MU381** in DMSO-*d6*


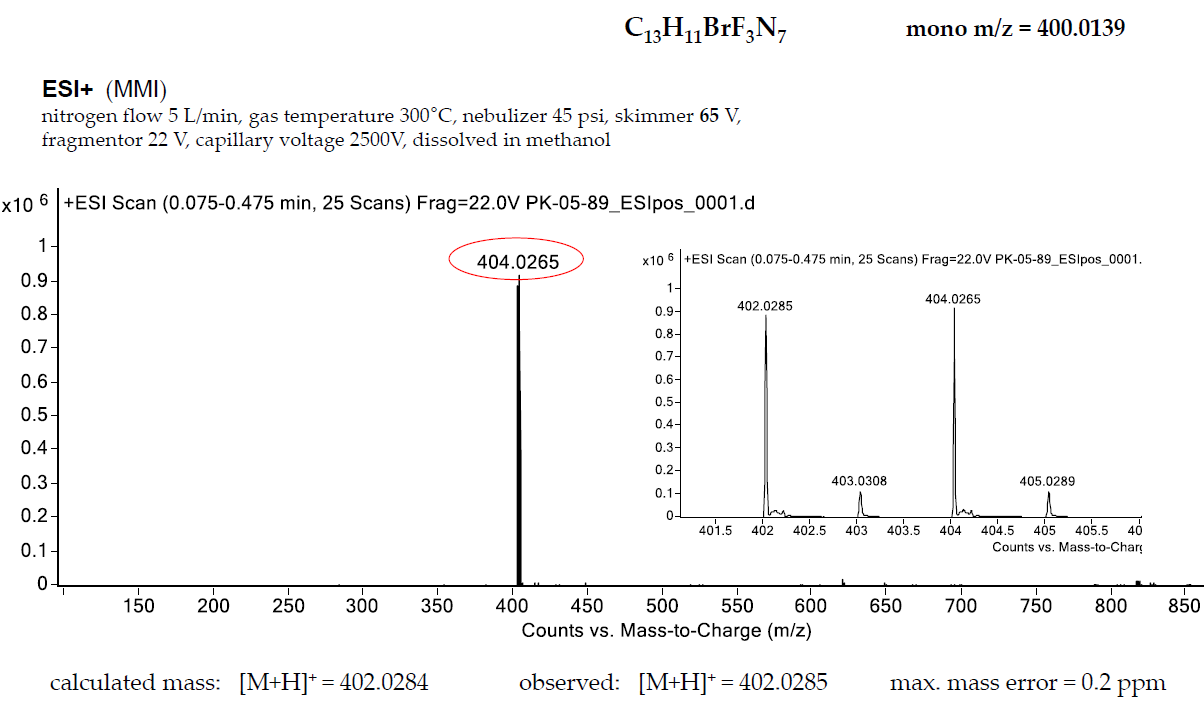


HRMS of compound **MU381**


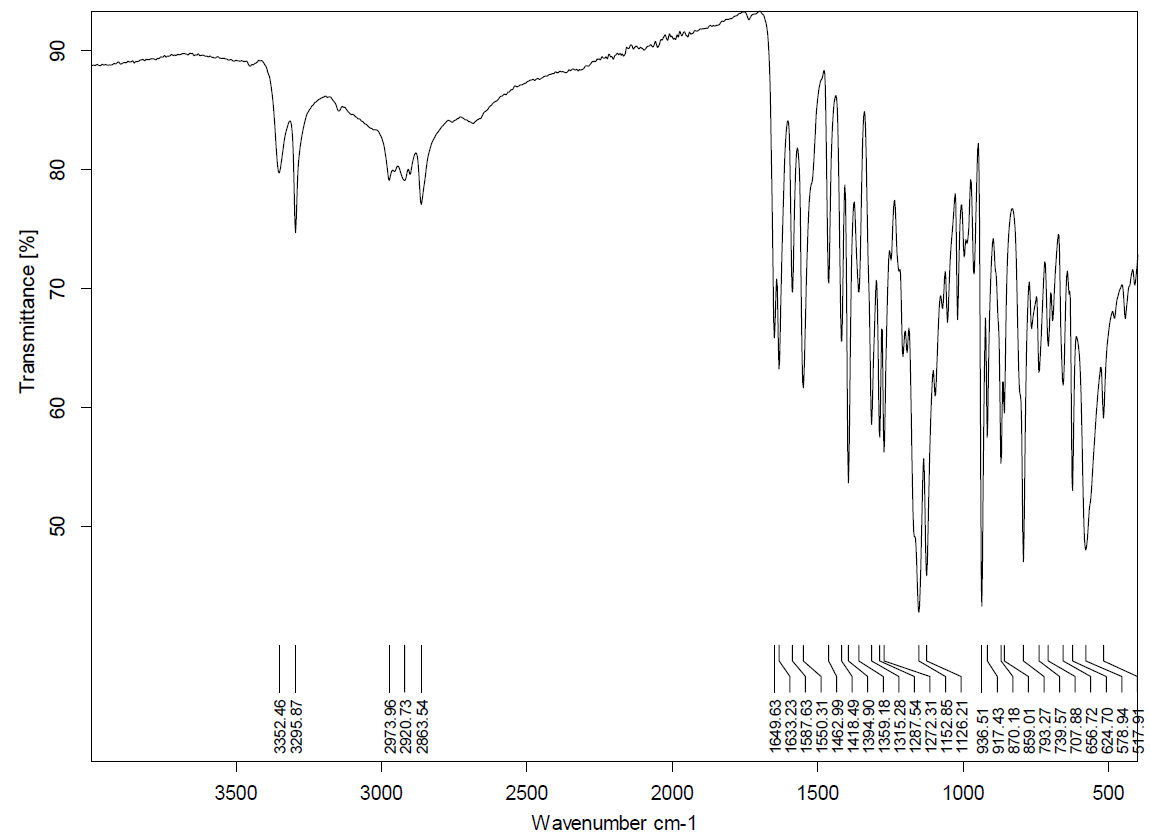


IR spectrum of compound **MU381**


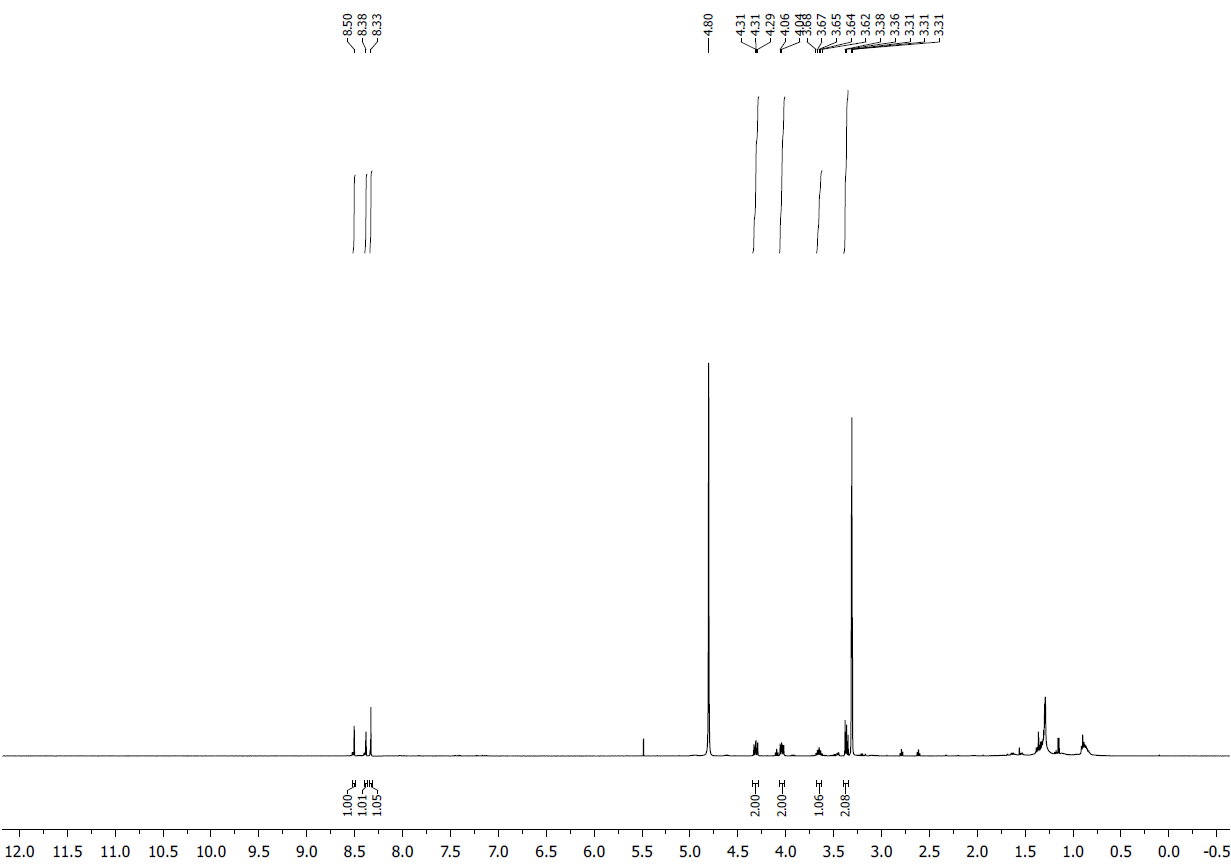


1H NMR (500MHz) spectrum of compound **MU382** in CD3OD


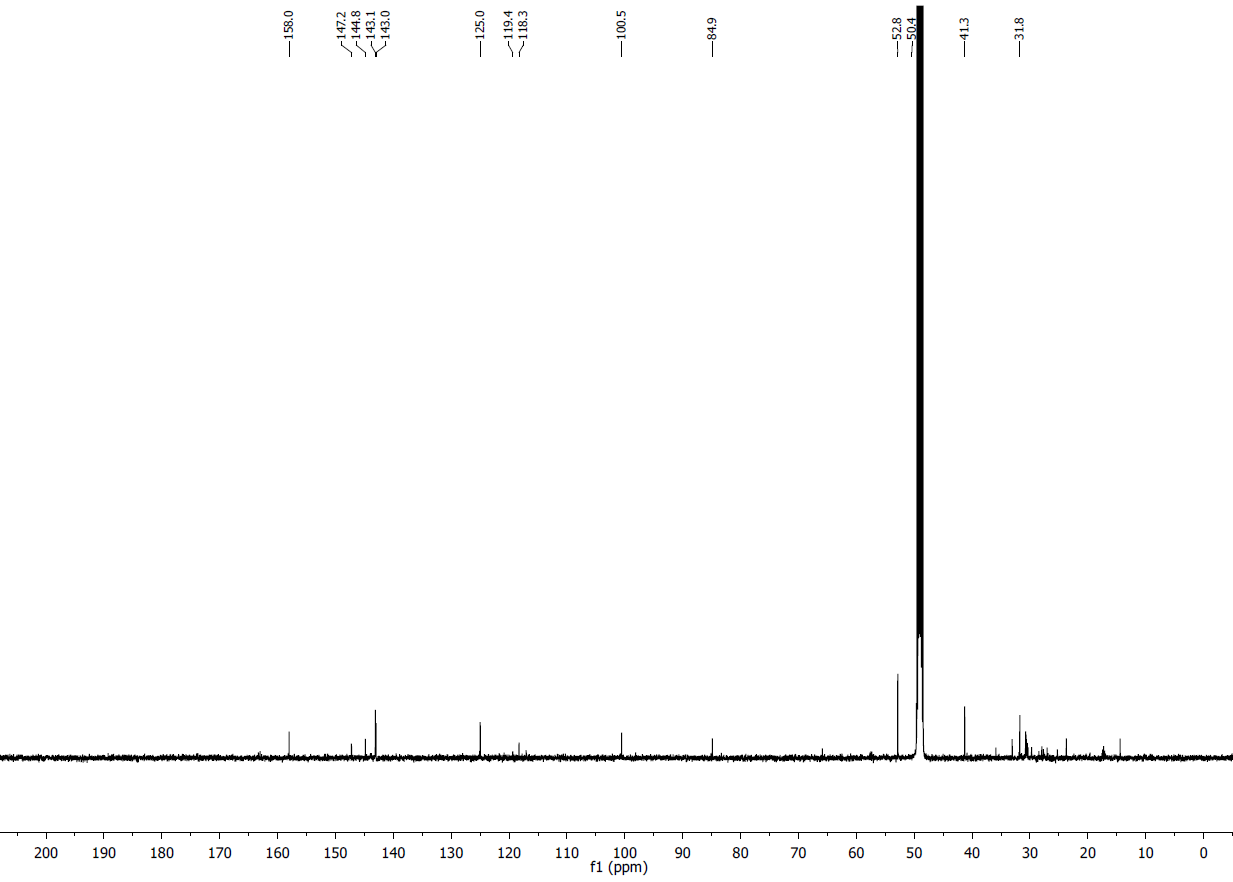


13C NMR (126 MHz) spectrum of compound **MU382** in CD3OD


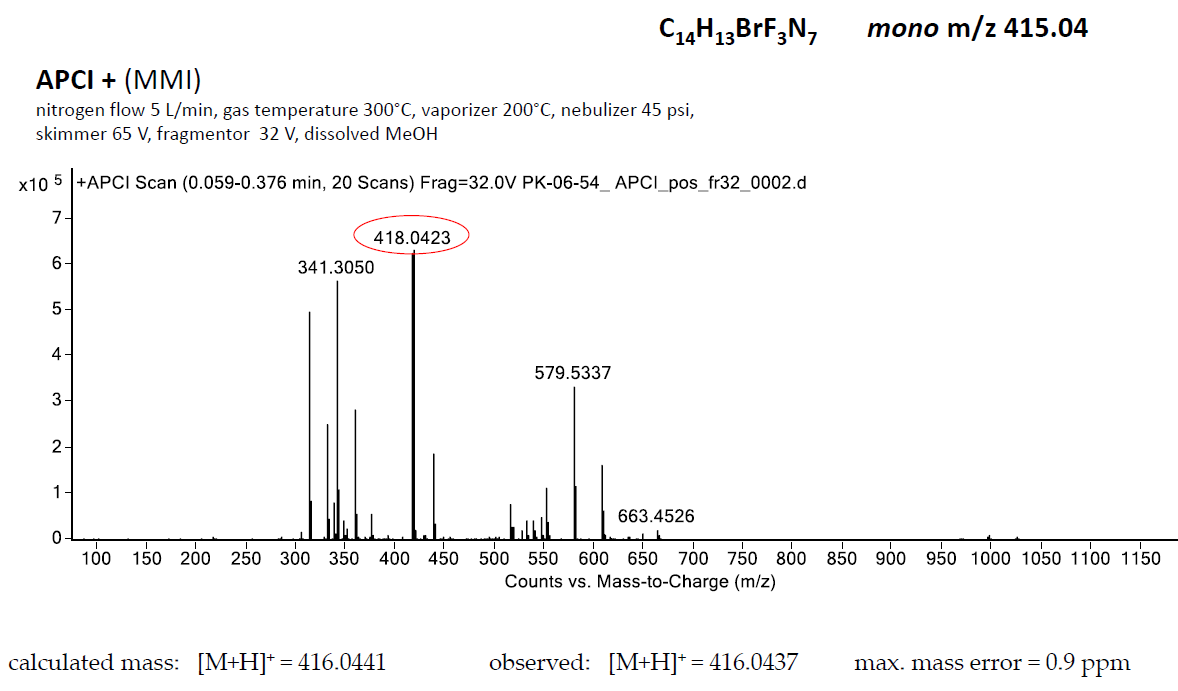


HRMS of compound **MU382**


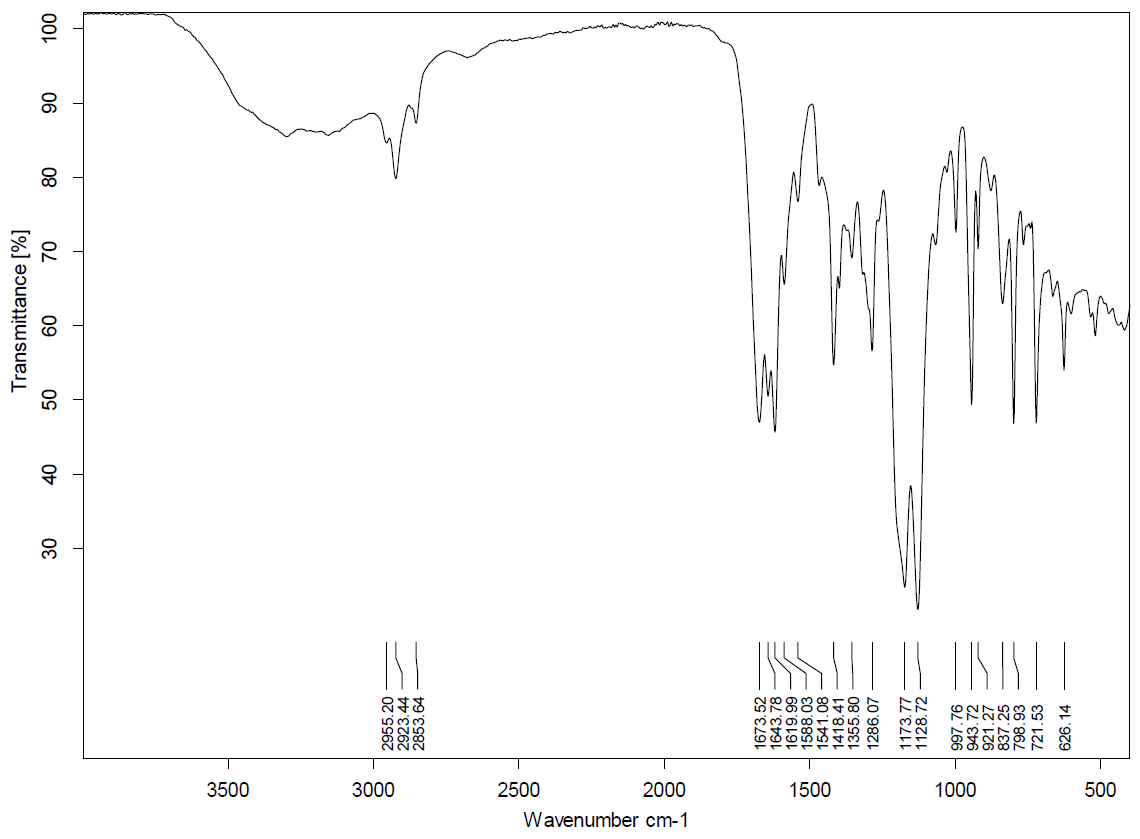


IR spectrum of compound **MU382**


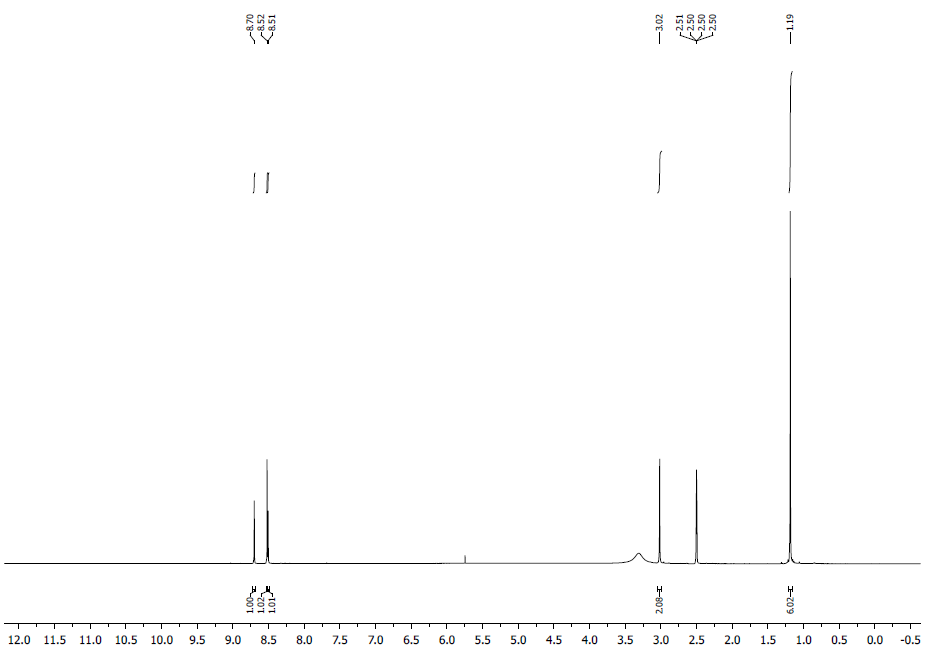


1H NMR (500MHz) spectrum of compound **MU383** in DMSO-*d6*


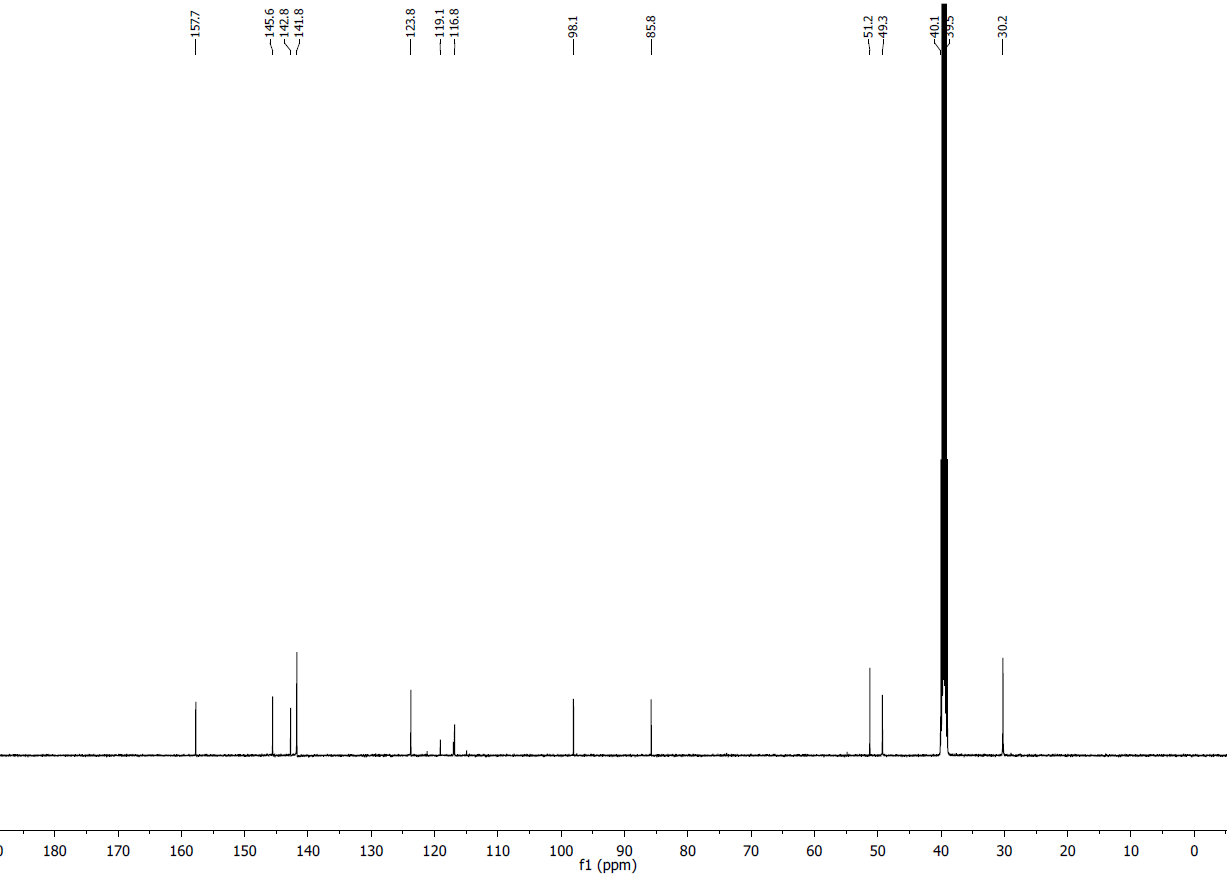


13C NMR (126 MHz) spectrum of compound **MU383** in DMSO-*d6*


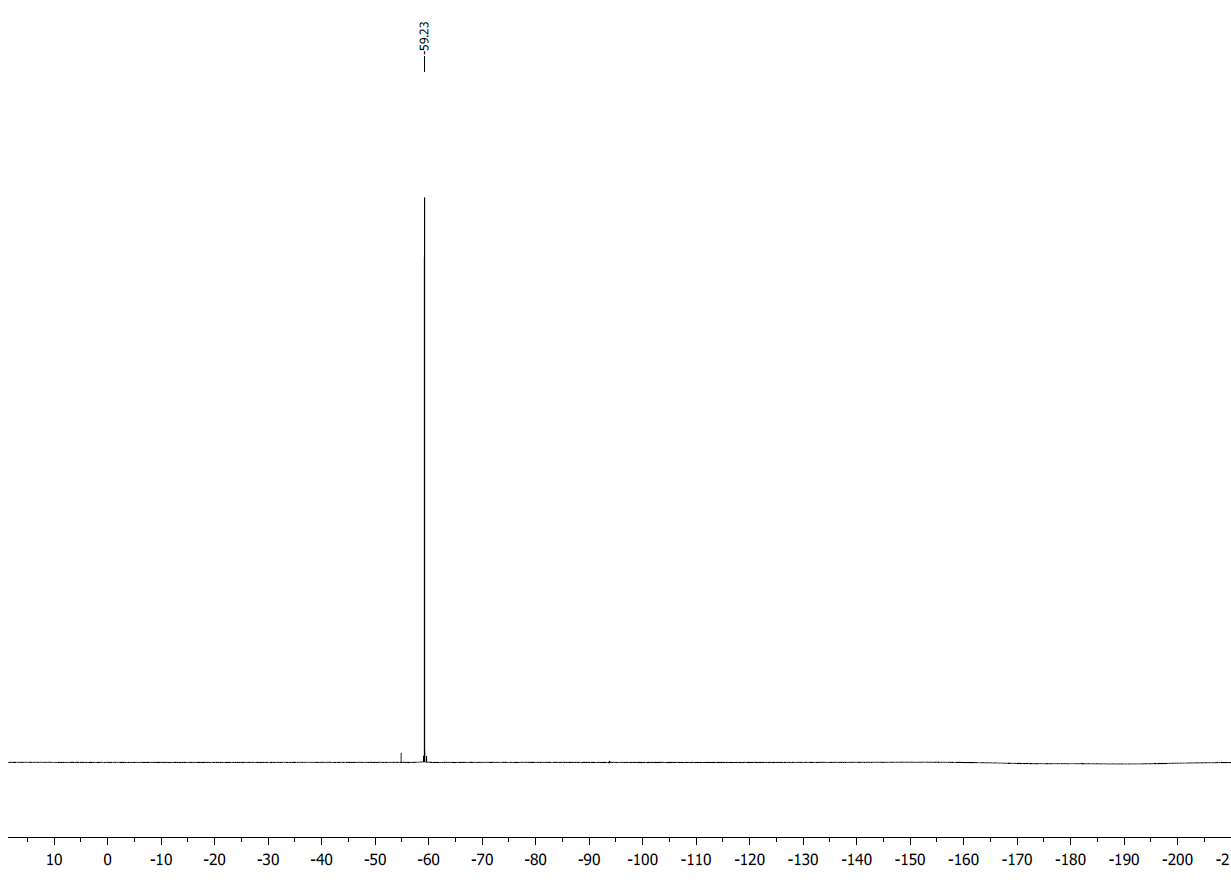


19F NMR (471MHz) spectrum of compound **MU383** in DMSO-*d6*


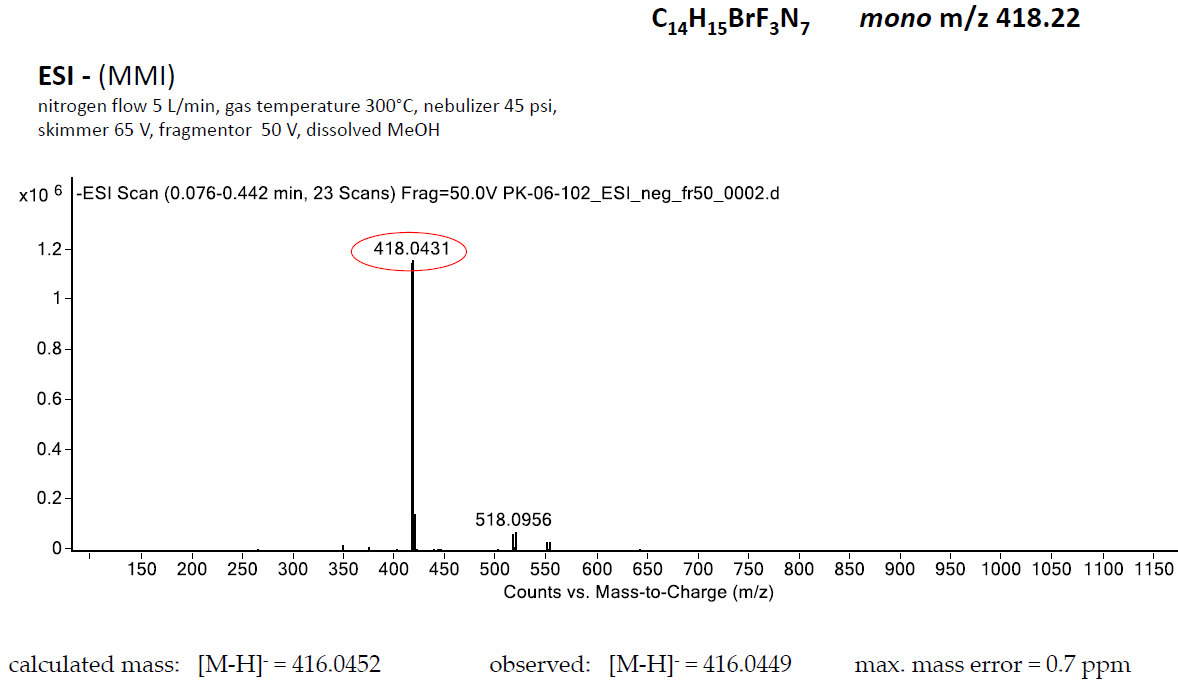


HRMS of compound **MU383**


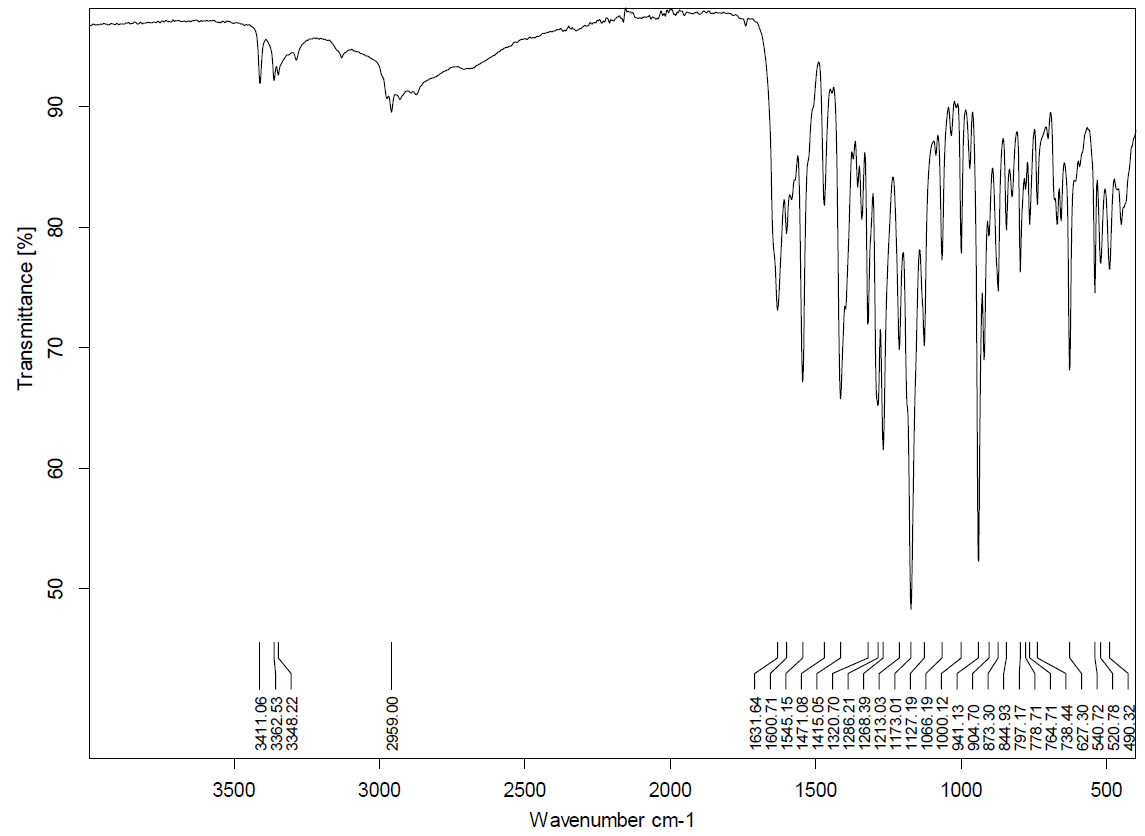


IR spectrum of compound **MU383**


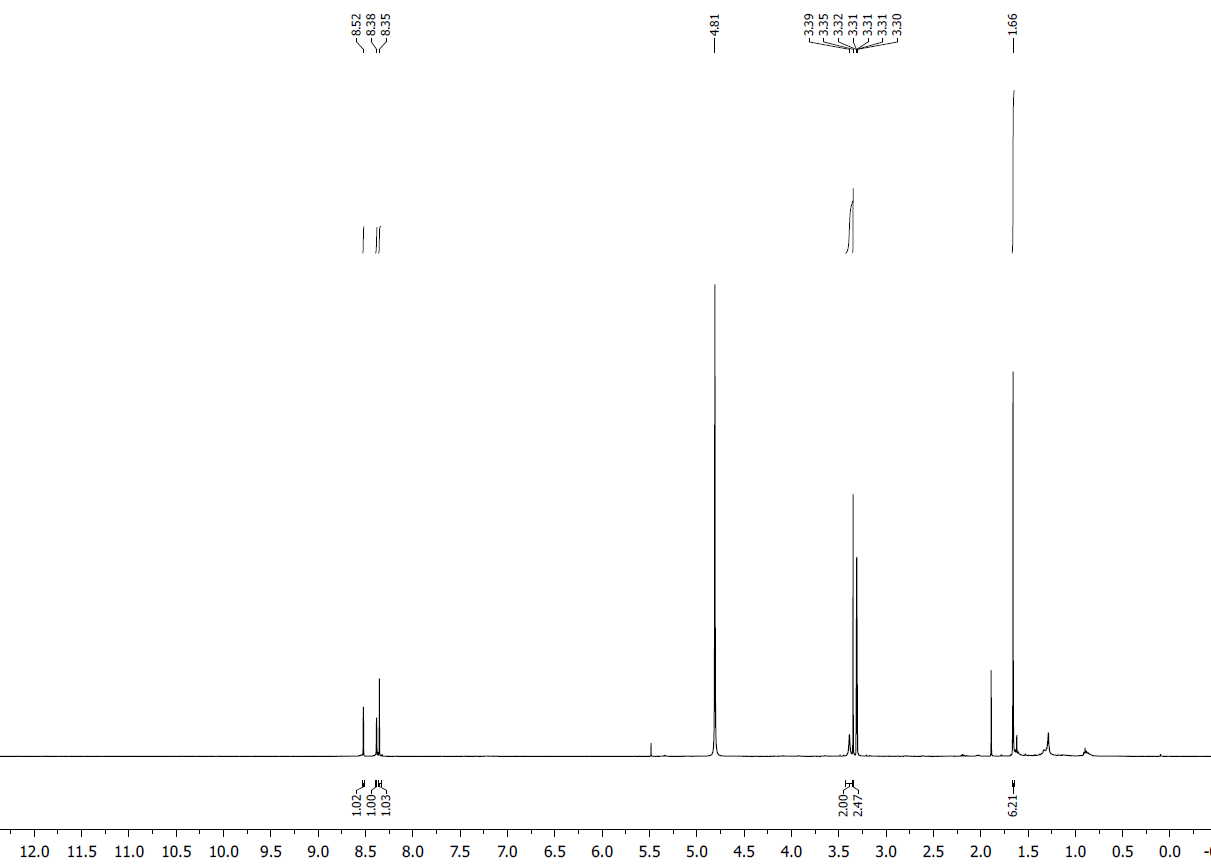


1H NMR (500MHz) spectrum of compound **MU385** in CD3OD

13C NMR (126 MHz) spectrum of compound **MU385** in CD3OD


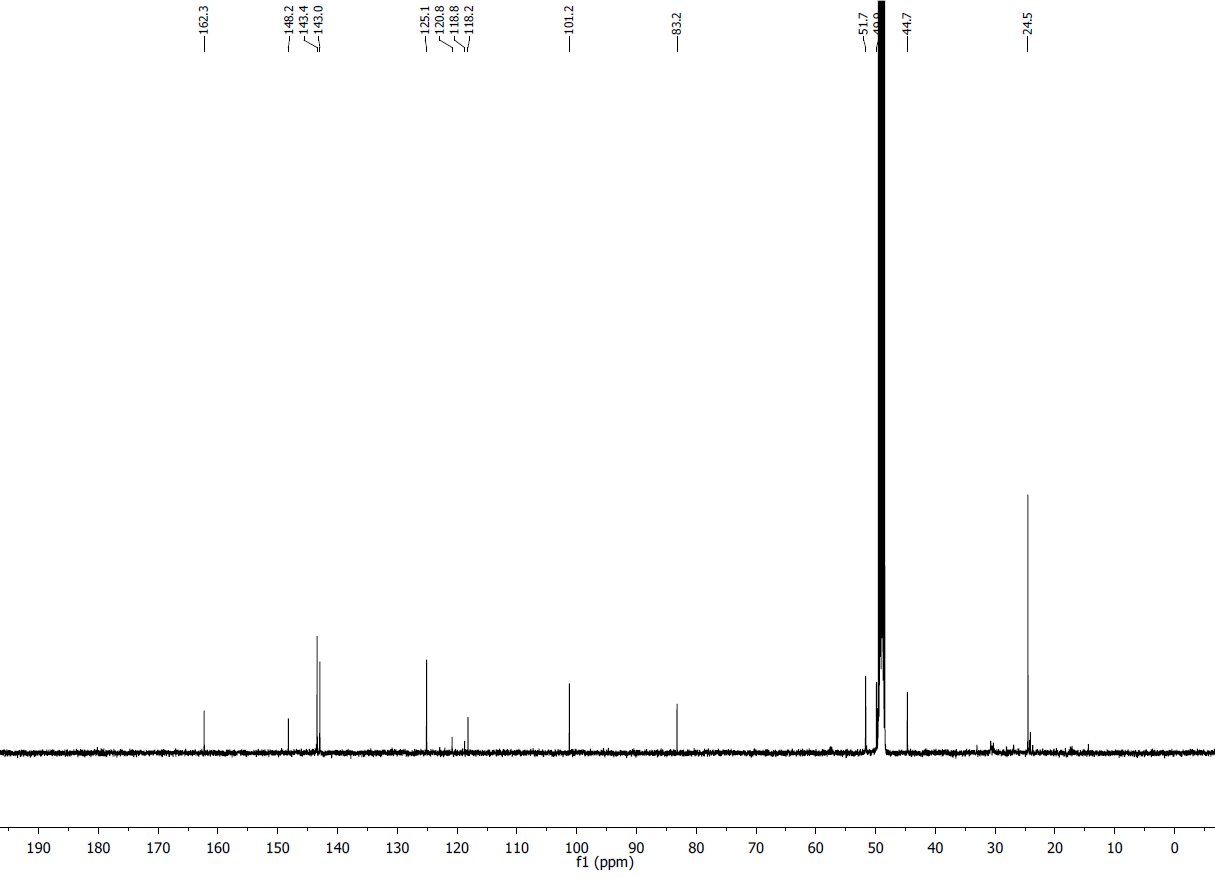

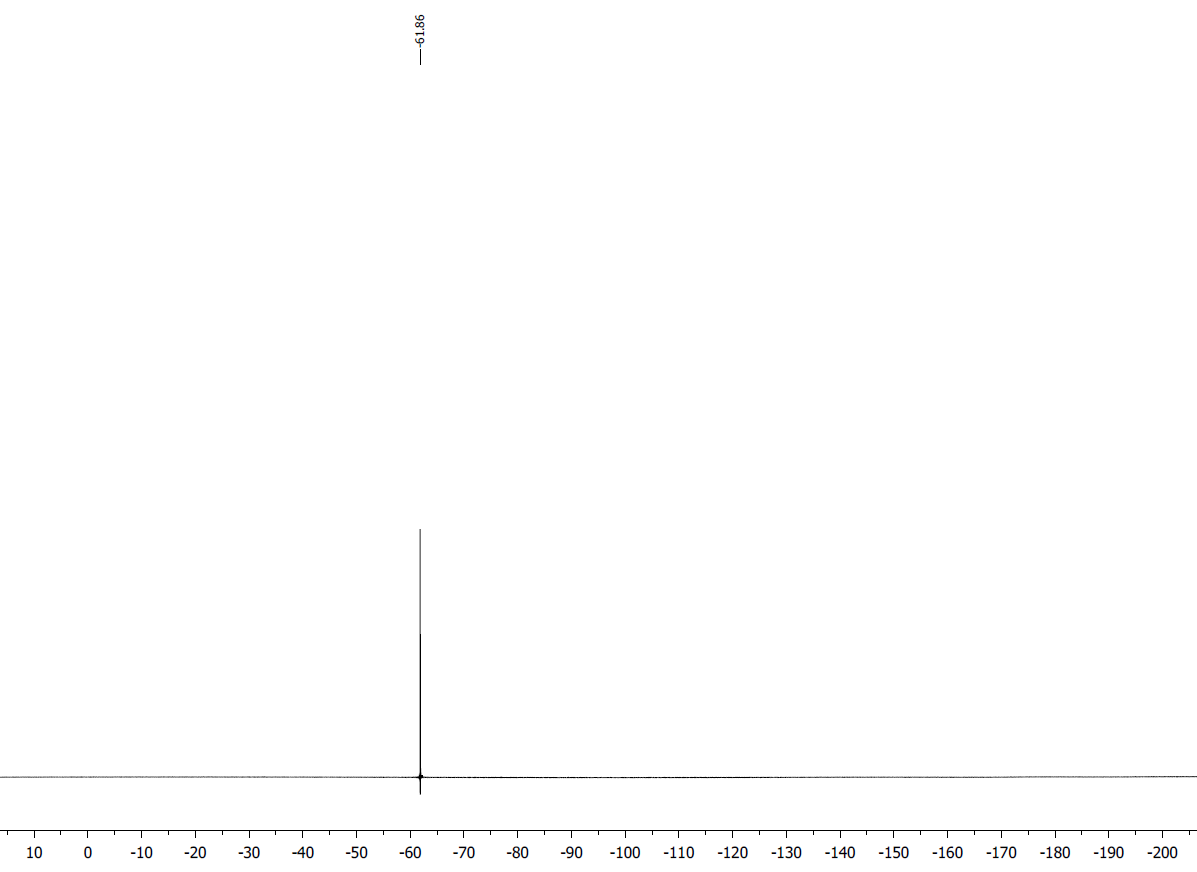


19F NMR (471MHz) spectrum of compound **MU385** in CD3OD


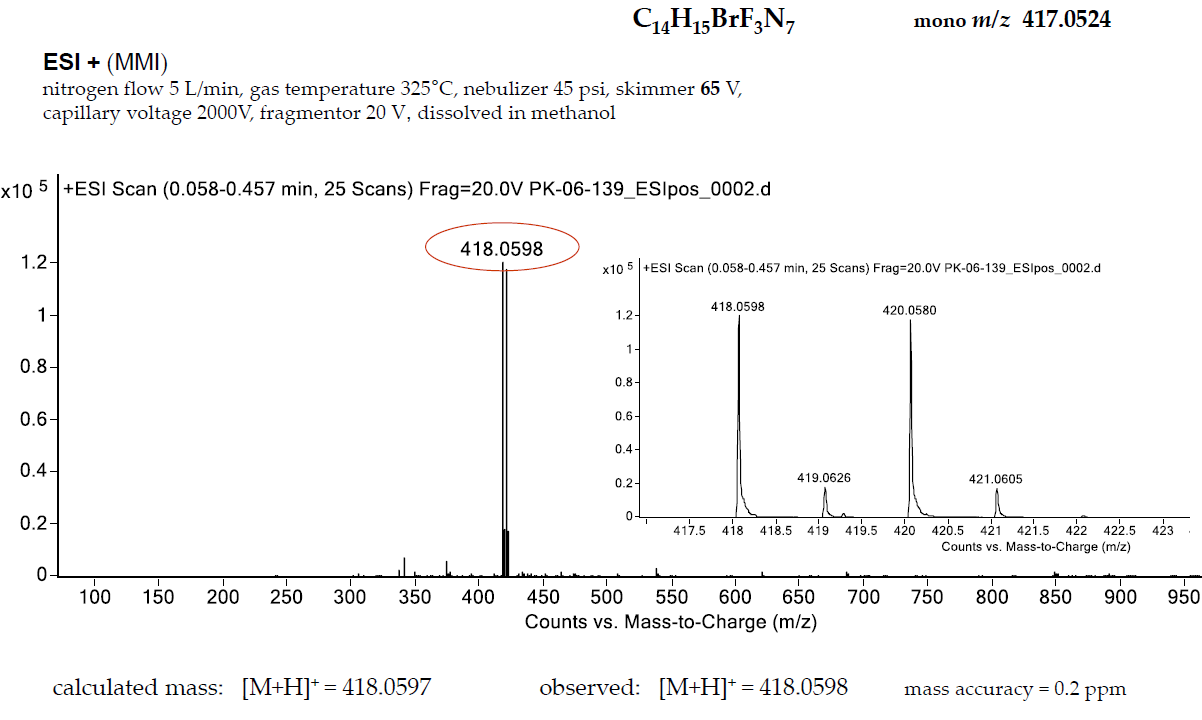


HRMS of compound **MU385**


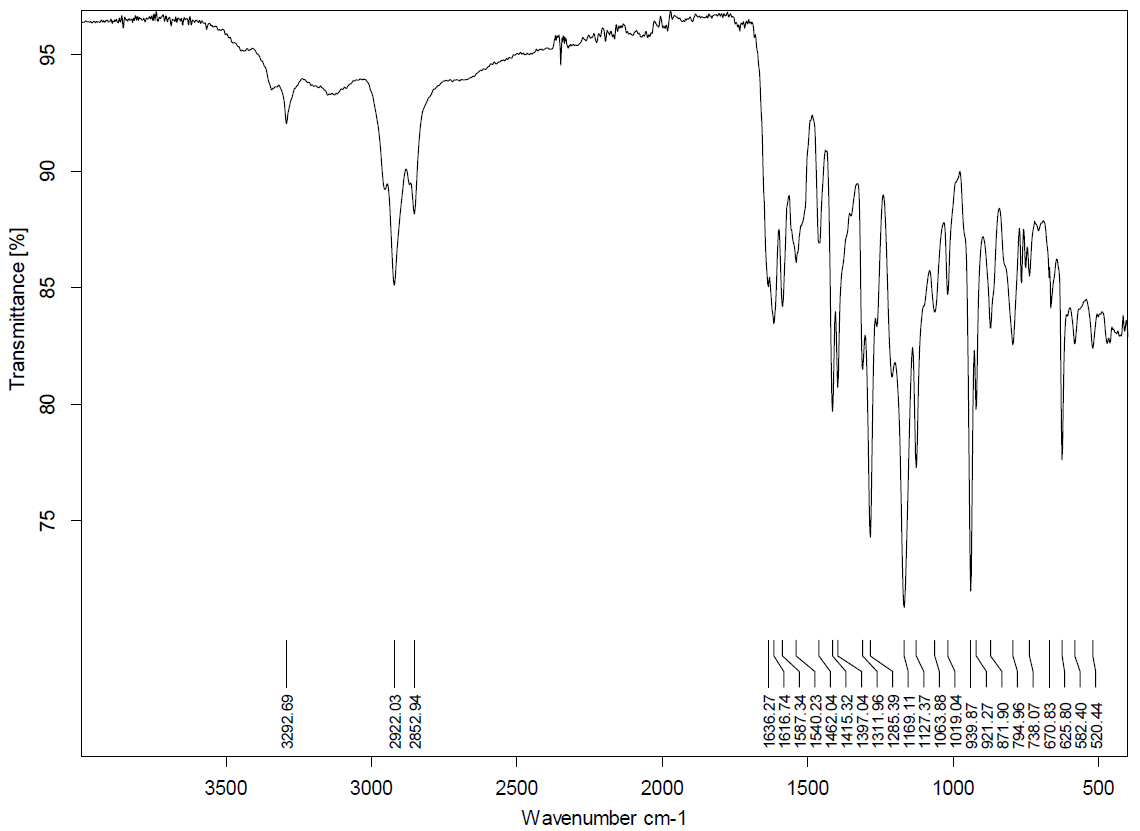


IR spectrum of compound **MU385**

**MU380 HPLC chromatograms:**

Column : NUCLEODUR® C18 HTec, 5 µm (Length: 250 mm, 4.6 mm ID)

Injection Volume : 25 µL (a solution of 1 mg of MU380 in 2 mL of Methanol)

Flow Rate : 1 mL/min

Mobile Phase : Methanol/Water 60 : 40 + 0.25 % Acetic acid

HPLC instrument : Agilent Technologies 1260 Infinity

Retention time : 2.378 minute


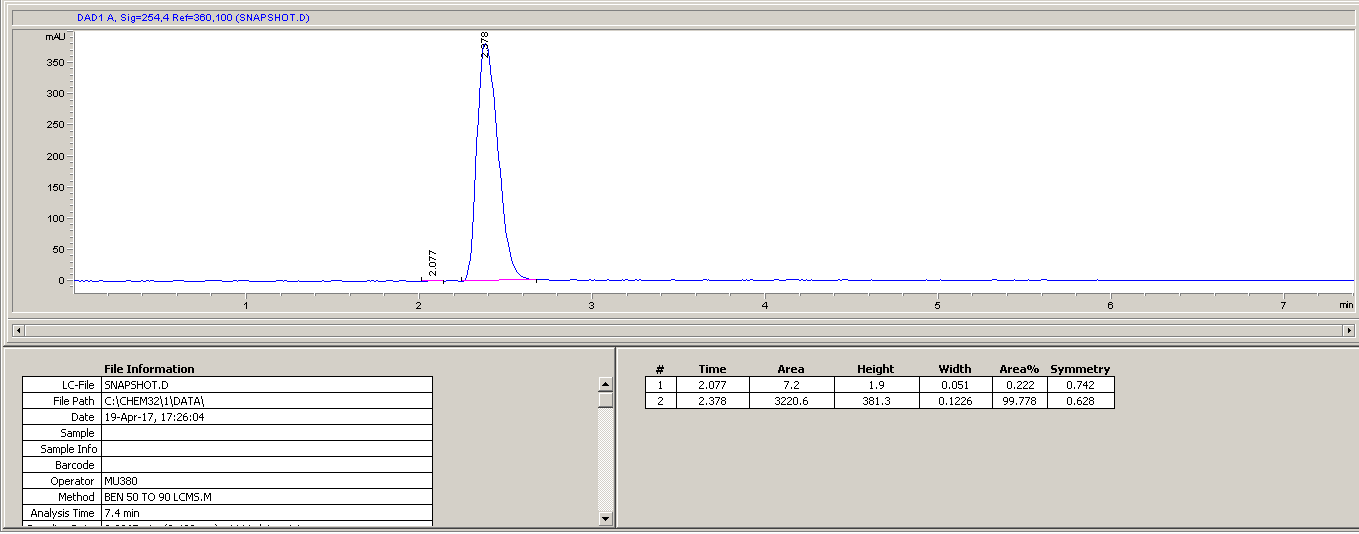


HPLC chromatogram of compound **MU380** (254 nm)


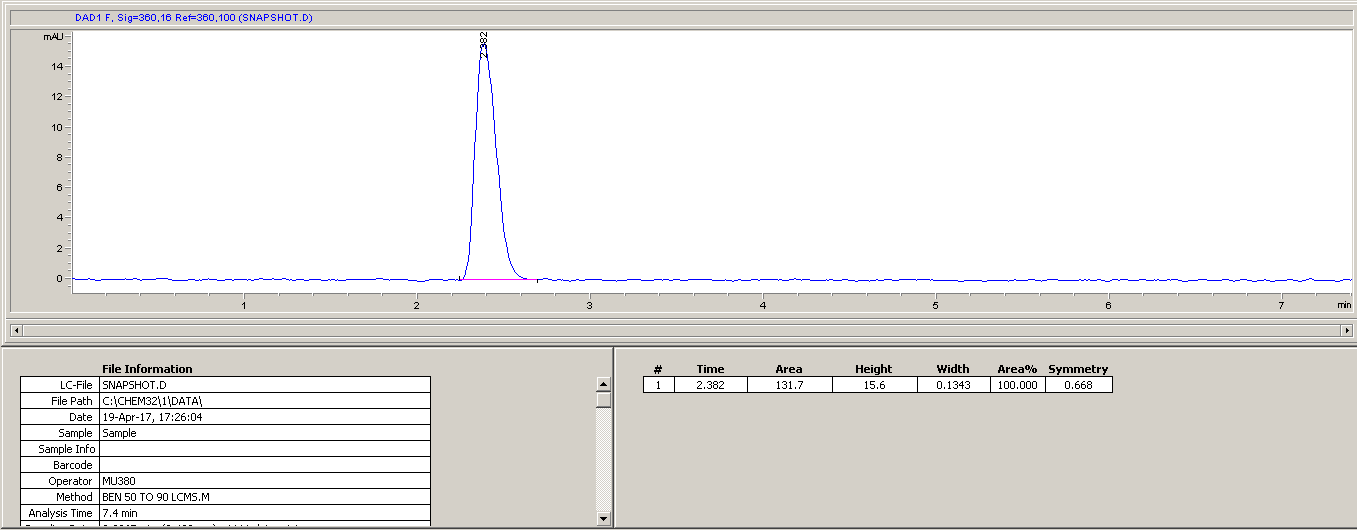


HPLC chromatogram of compound **MU380** (360 nm)

**SCH900776 HPLC chromatograms:**

Column : NUCLEODUR® C18 HTec, 5 µm (Length: 250 mm, 4.6 mm ID)

Injection Volume : 25 µL (a solution of 1 mg of SCH900776 in 2 mL of Methanol)

Flow Rate : 1 mL/min

Mobile Phase : Methanol/Water 60 : 40 + 0.25 % Acetic acid

HPLC instrument : Agilent Technologies 1260 Infinity

Retention time : 1.833 minute


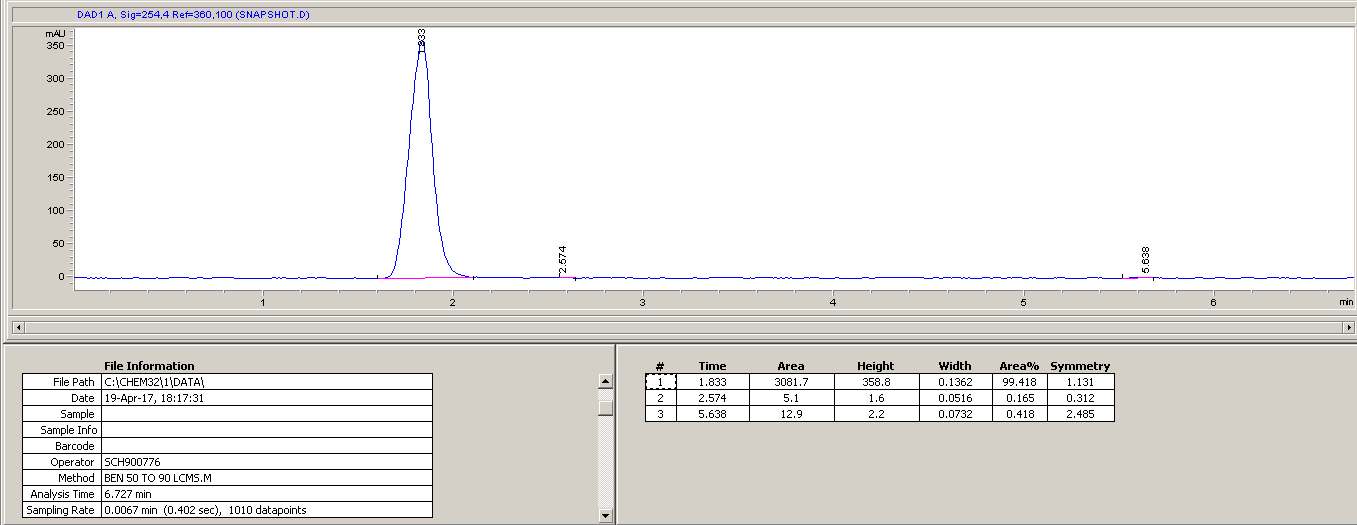


HPLC chromatogram of compound **SCH900776** (254 nm)


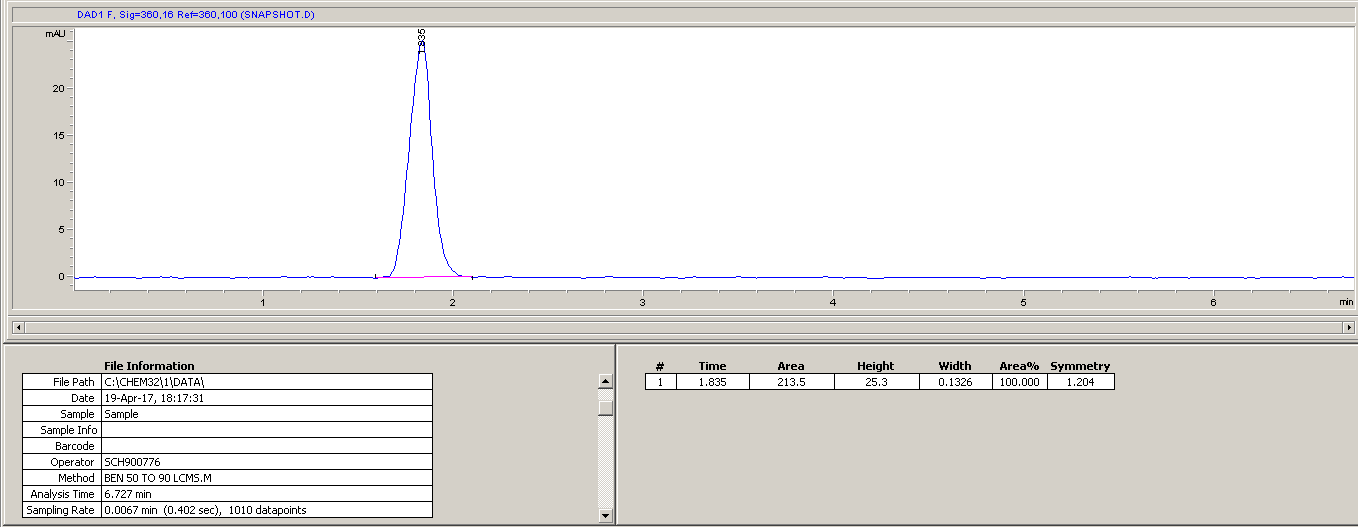


HPLC chromatogram of compound **SCH900776** (360 nm)
